# Supplementary material for: Synthesis and biological evaluation of XB-1 analogues as novel histamine H3 receptor antagonists and neuroprotective agents
Source: Royal Society of Chemistry journal article supplement (doi:10.1039/c3ra46392c), 2014-01-01

## Supporting Materials

|                                                                                              |     |
|----------------------------------------------------------------------------------------------|-----|
| Figure 1. $^1\text{H}$ NMR (500MHz, DMSO- $d_6$ ) of <b>4a</b> .....                         | S5  |
| Figure 2. $^{13}\text{C}$ NMR (125MHz, DMSO- $d_6$ ) of <b>4a</b> .....                      | S6  |
| Figure 3. $^1\text{H}$ NMR (500MHz, $\text{CD}_3\text{OD}$ ) of <b>5a</b> .....              | S7  |
| Figure 4. $^{13}\text{C}$ NMR (125MHz, $\text{CD}_3\text{OD}$ ) of <b>5a</b> .....           | S8  |
| Figure 5. $^{19}\text{F}$ NMR (475MHz, $\text{CD}_3\text{OD}$ ) of <b>5a</b> .....           | S9  |
| Figure 6. $^1\text{H}$ NMR (500MHz, $\text{CDCl}_3$ ) of <b>2b</b> .....                     | S10 |
| Figure 7. $^1\text{H}$ NMR (500MHz, $\text{CDCl}_3$ ) of <b>3b</b> .....                     | S11 |
| Figure 8. $^1\text{H}$ NMR (500MHz, $\text{CDCl}_3$ ) of <b>4b</b> .....                     | S12 |
| Figure 9. $^{13}\text{C}$ NMR (125MHz, DMSO- $d_6$ ) of <b>4b</b> .....                      | S13 |
| Figure 10. $^1\text{H}$ NMR (400MHz, $\text{CDCl}_3$ ) of <b>5b</b> .....                    | S14 |
| Figure 11. $^{13}\text{C}$ NMR (125MHz, $\text{CDCl}_3$ ) of <b>5b</b> .....                 | S15 |
| Figure 12. $^1\text{H}$ NMR (500MHz, $\text{CDCl}_3$ ) of <b>2c</b> .....                    | S16 |
| Figure 13. $^1\text{H}$ NMR (500MHz, $\text{CDCl}_3$ ) of <b>3c</b> .....                    | S17 |
| Figure 14. $^1\text{H}$ NMR (500MHz, $\text{CD}_3\text{OD}$ ) of <b>4c</b> .....             | S18 |
| Figure 15. $^1\text{H}$ NMR (500MHz, $\text{CDCl}_3$ ) of <b>5c</b> .....                    | S19 |
| Figure 16. $^{13}\text{C}$ NMR (125MHz, $\text{CDCl}_3$ ) of <b>5c</b> .....                 | S20 |
| Figure 17. $^{19}\text{F}$ NMR (470MHz, $\text{CDCl}_3$ ) of <b>5c</b> .....                 | S21 |
| Figure 18. $^1\text{H}$ NMR (500MHz, $\text{CDCl}_3$ ) of <b>2d</b> .....                    | S22 |
| Figure 19. $^1\text{H}$ NMR (500MHz, $\text{CDCl}_3/\text{DMSO-}d_6$ ) of <b>3d</b> .....    | S23 |
| Figure 20. $^{13}\text{C}$ NMR (125MHz, $\text{CDCl}_3/\text{DMSO-}d_6$ ) of <b>3d</b> ..... | S24 |
| Figure 21. $^1\text{H}$ NMR (500MHz, DMSO- $d_6$ ) of <b>4d</b> .....                        | S25 |
| Figure 22. $^{13}\text{C}$ NMR (125MHz, DMSO- $d_6$ ) of <b>4d</b> .....                     | S26 |
| Figure 23. $^1\text{H}$ NMR (500MHz, $\text{CDCl}_3$ ) of <b>5d</b> .....                    | S27 |
| Figure 24. $^{13}\text{C}$ NMR (125MHz, $\text{CDCl}_3$ ) of <b>5d</b> .....                 | S28 |
| Figure 25. $^1\text{H}$ NMR (500MHz, $\text{CDCl}_3$ ) of <b>6a</b> .....                    | S29 |
| Figure 26. $^{13}\text{C}$ NMR (125MHz, $\text{CDCl}_3$ ) of <b>6a</b> .....                 | S30 |
| Figure 27. $^1\text{H}$ NMR (500MHz, $\text{CDCl}_3$ ) of <b>7a</b> .....                    | S31 |
| Figure 28. $^{13}\text{C}$ NMR (125MHz, $\text{CDCl}_3$ ) of <b>7a</b> .....                 | S32 |

|                                                                                     |     |
|-------------------------------------------------------------------------------------|-----|
| Figure 29. $^{19}\text{F}$ NMR (470MHz, $\text{CDCl}_3$ ) of <b>7a</b> .....        | S33 |
| Figure 30. $^1\text{H}$ NMR (500MHz, $\text{CDCl}_3$ ) of <b>6a'</b> .....          | S34 |
| Figure 31. $^{13}\text{C}$ NMR (125MHz, $\text{CDCl}_3$ ) of <b>6a'</b> .....       | S35 |
| Figure 32. $^1\text{H}$ NMR (500MHz, $\text{CDCl}_3$ ) of <b>7a'</b> .....          | S36 |
| Figure 33. $^{13}\text{C}$ NMR (125MHz, $\text{CDCl}_3$ ) of <b>7a'</b> .....       | S37 |
| Figure 34. $^{19}\text{F}$ NMR (470MHz, $\text{CDCl}_3$ ) of <b>7a'</b> .....       | S38 |
| Figure 35. $^1\text{H}$ NMR (500MHz, $\text{CDCl}_3$ ) of <b>6b</b> .....           | S39 |
| Figure 36. $^{13}\text{C}$ NMR (125MHz, $\text{CDCl}_3$ ) of <b>6b</b> .....        | S40 |
| Figure 37. $^1\text{H}$ NMR (500MHz, $\text{CDCl}_3$ ) of <b>7b</b> .....           | S41 |
| Figure 38. $^{13}\text{C}$ NMR (125MHz, $\text{CD}_3\text{OD}$ ) of <b>7b</b> ..... | S42 |
| Figure 39. $^1\text{H}$ NMR (500MHz, $\text{CDCl}_3$ ) of <b>6b'</b> .....          | S43 |
| Figure 40. $^{13}\text{C}$ NMR (125MHz, $\text{CDCl}_3$ ) of <b>6b'</b> .....       | S44 |
| Figure 41. $^1\text{H}$ NMR (500MHz, $\text{CDCl}_3$ ) of <b>7b'</b> .....          | S45 |
| Figure 42. $^{13}\text{C}$ NMR (125MHz, $\text{CDCl}_3$ ) of <b>7b'</b> .....       | S46 |
| Figure 43. $^1\text{H}$ NMR (500MHz, $\text{CDCl}_3$ ) of <b>6c</b> .....           | S47 |
| Figure 44. $^{13}\text{C}$ NMR (125MHz, $\text{CDCl}_3$ ) of <b>6c</b> .....        | S48 |
| Figure 45. $^1\text{H}$ NMR (500MHz, $\text{CDCl}_3$ ) of <b>7c</b> .....           | S49 |
| Figure 46. $^{13}\text{C}$ NMR (125MHz, $\text{CDCl}_3$ ) of <b>7c</b> .....        | S50 |
| Figure 47. $^{19}\text{F}$ NMR (470MHz, $\text{CDCl}_3$ ) of <b>7c</b> .....        | S51 |
| Figure 48. $^1\text{H}$ NMR (500MHz, $\text{CDCl}_3$ ) of <b>6d</b> .....           | S52 |
| Figure 49. $^{13}\text{C}$ NMR (125MHz, $\text{CDCl}_3$ ) of <b>6d</b> .....        | S53 |
| Figure 50. $^1\text{H}$ NMR (500MHz, $\text{CDCl}_3$ ) of <b>7d</b> .....           | S54 |
| Figure 51. $^{13}\text{C}$ NMR (125MHz, $\text{CDCl}_3$ ) of <b>7d</b> .....        | S55 |
| Figure 52. $^1\text{H}$ NMR (500MHz, $\text{CDCl}_3$ ) of <b>6e</b> .....           | S56 |
| Figure 53. $^{13}\text{C}$ NMR (125MHz, $\text{CDCl}_3$ ) of <b>6e</b> .....        | S57 |
| Figure 54. $^1\text{H}$ NMR (500MHz, $\text{CDCl}_3$ ) of <b>7e</b> .....           | S58 |
| Figure 55. $^{13}\text{C}$ NMR (125MHz, $\text{CDCl}_3$ ) of <b>7e</b> .....        | S59 |
| Figure 56. $^{19}\text{F}$ NMR (470MHz, $\text{CDCl}_3$ ) of <b>7e</b> .....        | S60 |
| Figure 57. $^1\text{H}$ NMR (500MHz, $\text{CDCl}_3$ ) of <b>6e'</b> .....          | S61 |
| Figure 58. $^{13}\text{C}$ NMR (125MHz, $\text{CDCl}_3$ ) of <b>6e'</b> .....       | S62 |

|                                                                               |     |
|-------------------------------------------------------------------------------|-----|
| Figure 59. $^1\text{H}$ NMR (500MHz, $\text{CDCl}_3$ ) of <b>7e'</b> .....    | S63 |
| Figure 60. $^{13}\text{C}$ NMR (125MHz, $\text{CDCl}_3$ ) of <b>7e'</b> ..... | S64 |
| Figure 61. $^{19}\text{F}$ NMR (470MHz, $\text{CDCl}_3$ ) of <b>7e'</b> ..... | S65 |
| Figure 62. $^1\text{H}$ NMR (500MHz, $\text{CDCl}_3$ ) of <b>6f</b> .....     | S66 |
| Figure 63. $^{13}\text{C}$ NMR (125MHz, $\text{CDCl}_3$ ) of <b>6f</b> .....  | S67 |
| Figure 64. $^1\text{H}$ NMR (500MHz, $\text{CDCl}_3$ ) of <b>7f</b> .....     | S68 |
| Figure 65. $^{13}\text{C}$ NMR (125MHz, $\text{CDCl}_3$ ) of <b>7f</b> .....  | S69 |
| Figure 66. $^1\text{H}$ NMR (500MHz, $\text{CDCl}_3$ ) of <b>6f'</b> .....    | S70 |
| Figure 67. $^{13}\text{C}$ NMR (125MHz, $\text{CDCl}_3$ ) of <b>6f'</b> ..... | S71 |
| Figure 68. $^1\text{H}$ NMR (500MHz, $\text{CDCl}_3$ ) of <b>7f'</b> .....    | S72 |
| Figure 69. $^{13}\text{C}$ NMR (125MHz, $\text{CDCl}_3$ ) of <b>7f'</b> ..... | S73 |
| Figure 70. $^1\text{H}$ NMR (500MHz, DMSO-d6) of <b>2B</b> .....              | S74 |
| Figure 71. $^1\text{H}$ NMR (500MHz, DMSO-d6) of <b>3B</b> .....              | S75 |
| Figure 72. $^1\text{H}$ NMR (500MHz, DMSO-d6) of <b>4B</b> .....              | S76 |
| Figure 73. $^{13}\text{C}$ NMR (125MHz, DMSO-d6) of <b>4B</b> .....           | S77 |
| Figure 74. $^1\text{H}$ NMR (500MHz, $\text{CDCl}_3$ ) of <b>5B</b> .....     | S78 |
| Figure 75. $^{13}\text{C}$ NMR (125MHz, $\text{CDCl}_3$ ) of <b>5B</b> .....  | S79 |
| Figure 76. $^1\text{H}$ NMR (500MHz, $\text{CDCl}_3$ ) of <b>2E</b> .....     | S80 |
| Figure 77. $^{19}\text{F}$ NMR (470MHz, $\text{CDCl}_3$ ) of <b>2E</b> .....  | S81 |
| Figure 78. $^1\text{H}$ NMR (500MHz, $\text{CDCl}_3$ ) of <b>3E</b> .....     | S82 |
| Figure 79. $^1\text{H}$ NMR (500MHz, $\text{CDCl}_3$ ) of <b>4E</b> .....     | S83 |
| Figure 80. $^{13}\text{C}$ NMR (125MHz, $\text{CDCl}_3$ ) of <b>4E</b> .....  | S84 |
| Figure 81. $^1\text{H}$ NMR (500MHz, $\text{CDCl}_3$ ) of <b>5E</b> .....     | S85 |
| Figure 82. $^{13}\text{C}$ NMR (125MHz, $\text{CDCl}_3$ ) of <b>5E</b> .....  | S86 |
| Figure 83. $^{19}\text{F}$ NMR (470MHz, $\text{CDCl}_3$ ) of <b>5E</b> .....  | S87 |
| Figure 84. $^1\text{H}$ NMR (500MHz, $\text{CDCl}_3$ ) of <b>2F</b> .....     | S88 |
| Figure 85. $^1\text{H}$ NMR (500MHz, $\text{CDCl}_3$ ) of <b>3F</b> .....     | S89 |
| Figure 86. $^1\text{H}$ NMR (500MHz, DMSO-d6) of <b>4F</b> .....              | S90 |
| Figure 87. $^{13}\text{C}$ NMR (125MHz, DMSO-d6) of <b>4F</b> .....           | S91 |
| Figure 88. $^1\text{H}$ NMR (500MHz, $\text{CDCl}_3$ ) of <b>5F</b> .....     | S92 |

|                                                                                |      |
|--------------------------------------------------------------------------------|------|
| Figure 89. $^{13}\text{C}$ NMR (125MHz, $\text{CDCl}_3$ ) of <b>5F</b> .....   | S93  |
| Figure 91. $^{13}\text{C}$ NMR (125MHz, $\text{CDCl}_3$ ) of <b>6B</b> .....   | S95  |
| Figure 92. $^1\text{H}$ NMR (500MHz, $\text{CDCl}_3$ ) of <b>7B</b> .....      | S96  |
| Figure 93. $^{13}\text{C}$ NMR (125MHz, $\text{CDCl}_3$ ) of <b>7B</b> .....   | S97  |
| Figure 94. $^1\text{H}$ NMR (500MHz, $\text{CDCl}_3$ ) of <b>6B'</b> .....     | S98  |
| Figure 95. $^{13}\text{C}$ NMR (125MHz, $\text{CDCl}_3$ ) of <b>6B'</b> .....  | S99  |
| Figure 96. $^1\text{H}$ NMR (500MHz, $\text{CDCl}_3$ ) of <b>7B'</b> .....     | S100 |
| Figure 97. $^{13}\text{C}$ NMR (125MHz, $\text{CDCl}_3$ ) of <b>7B'</b> .....  | S101 |
| Figure 98. $^1\text{H}$ NMR (500MHz, $\text{CDCl}_3$ ) of <b>6E</b> .....      | S102 |
| Figure 99. $^{13}\text{C}$ NMR (125MHz, $\text{CDCl}_3$ ) of <b>6E</b> .....   | S103 |
| Figure 100. $^{19}\text{F}$ NMR (470MHz, $\text{CDCl}_3$ ) of <b>6E</b> .....  | S104 |
| Figure 101. $^1\text{H}$ NMR (500MHz, $\text{CDCl}_3$ ) of <b>7E</b> .....     | S105 |
| Figure 102. $^{13}\text{C}$ NMR (125MHz, $\text{CDCl}_3$ ) of <b>7E</b> .....  | S106 |
| Figure 103. $^{19}\text{F}$ NMR (470MHz, $\text{CDCl}_3$ ) of <b>7E</b> .....  | S107 |
| Figure 104. $^1\text{H}$ NMR (500MHz, $\text{CDCl}_3$ ) of <b>6E'</b> .....    | S108 |
| Figure 105. $^{13}\text{C}$ NMR (125MHz, $\text{CDCl}_3$ ) of <b>6E'</b> ..... | S109 |
| Figure 106. $^{19}\text{F}$ NMR (470MHz, $\text{CDCl}_3$ ) of <b>6E'</b> ..... | S110 |
| Figure 107. $^1\text{H}$ NMR (500MHz, $\text{CDCl}_3$ ) of <b>7E'</b> .....    | S111 |
| Figure 108. $^{13}\text{C}$ NMR (125MHz, $\text{CDCl}_3$ ) of <b>7E'</b> ..... | S112 |
| Figure 109. $^{19}\text{F}$ NMR (470MHz, $\text{CDCl}_3$ ) of <b>7E'</b> ..... | S113 |
| Figure 110. $^1\text{H}$ NMR (500MHz, $\text{CDCl}_3$ ) of <b>6F</b> .....     | S114 |
| Figure 111. $^{13}\text{C}$ NMR (125MHz, $\text{CDCl}_3$ ) of <b>6F</b> .....  | S115 |
| Figure 112. $^1\text{H}$ NMR (500MHz, $\text{CDCl}_3$ ) of <b>7F</b> .....     | S116 |
| Figure 113. $^{13}\text{C}$ NMR (125MHz, $\text{CDCl}_3$ ) of <b>7F</b> .....  | S117 |
| Figure 114. $^1\text{H}$ NMR (500MHz, $\text{CDCl}_3$ ) of <b>6F'</b> .....    | S118 |
| Figure 115. $^{13}\text{C}$ NMR (125MHz, $\text{CDCl}_3$ ) of <b>6F'</b> ..... | S119 |
| Figure 116. $^1\text{H}$ NMR (500MHz, $\text{CDCl}_3$ ) of <b>7F'</b> .....    | S120 |
| Figure 117. $^{13}\text{C}$ NMR (125MHz, $\text{CDCl}_3$ ) of <b>7F'</b> ..... | S121 |

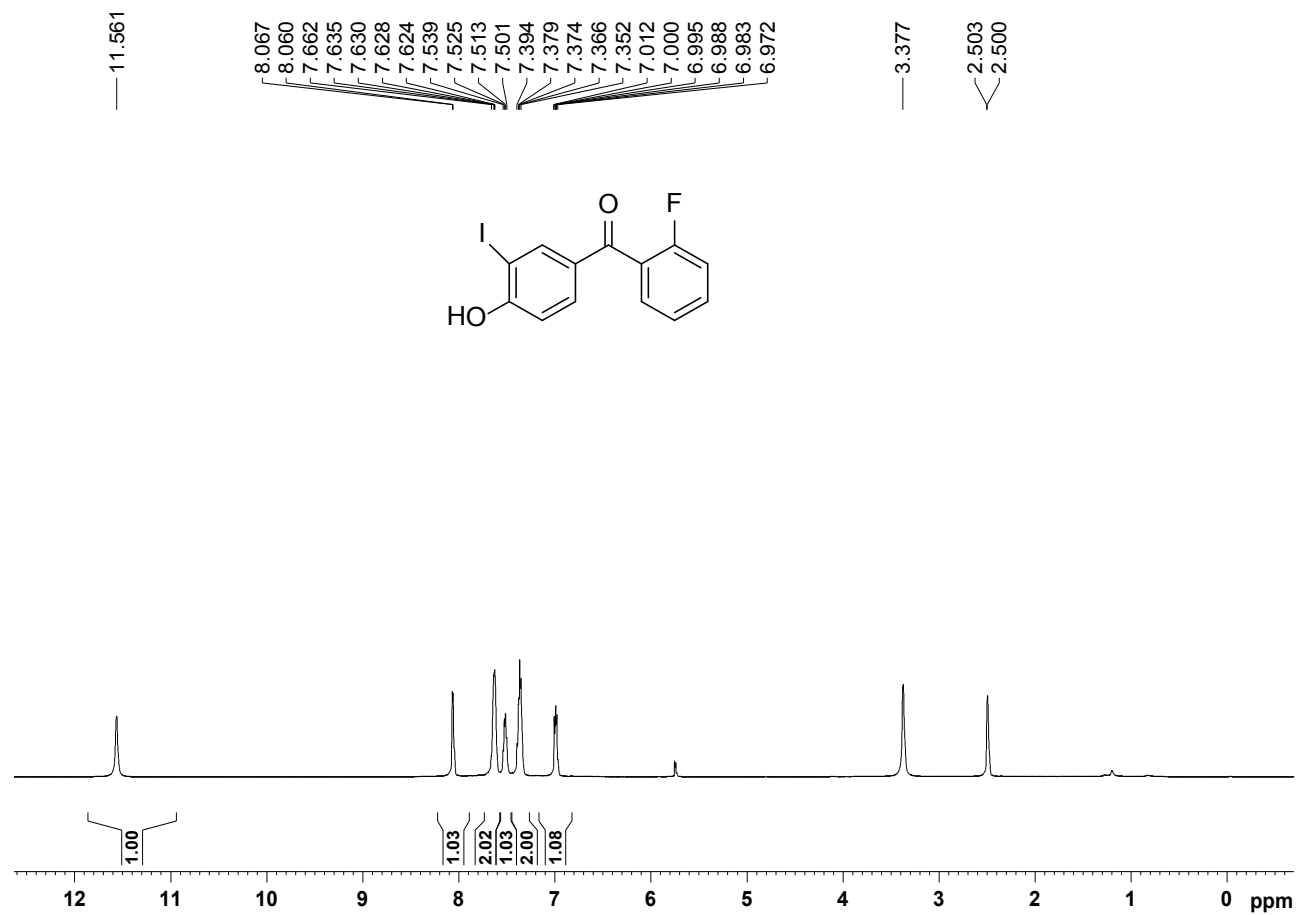

Figure 1. <sup>1</sup>H NMR (500MHz, DMSO-d<sub>6</sub>) of **4a**

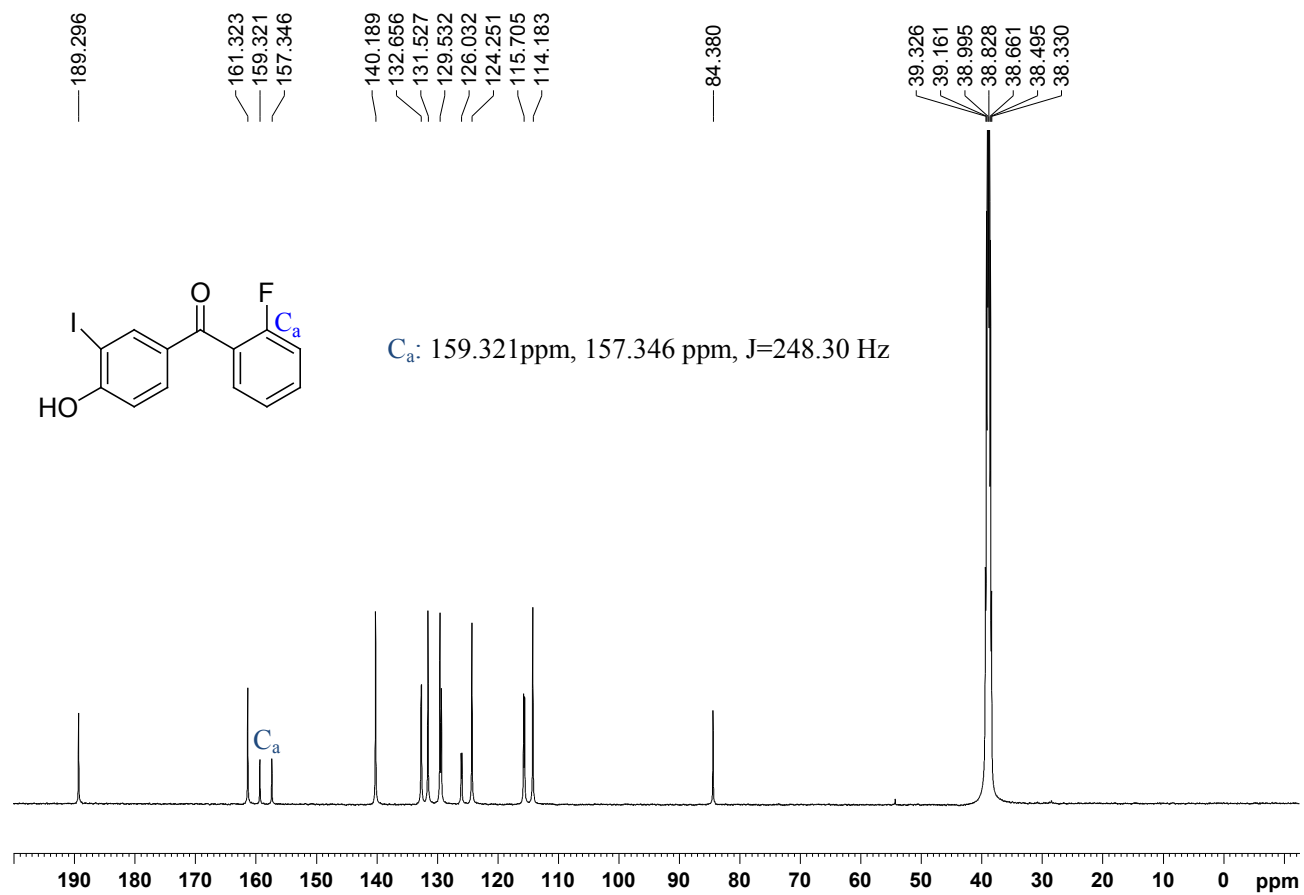

Figure 2.  $^{13}\text{C}$  NMR (125MHz, DMSO- $d_6$ ) of 4a.

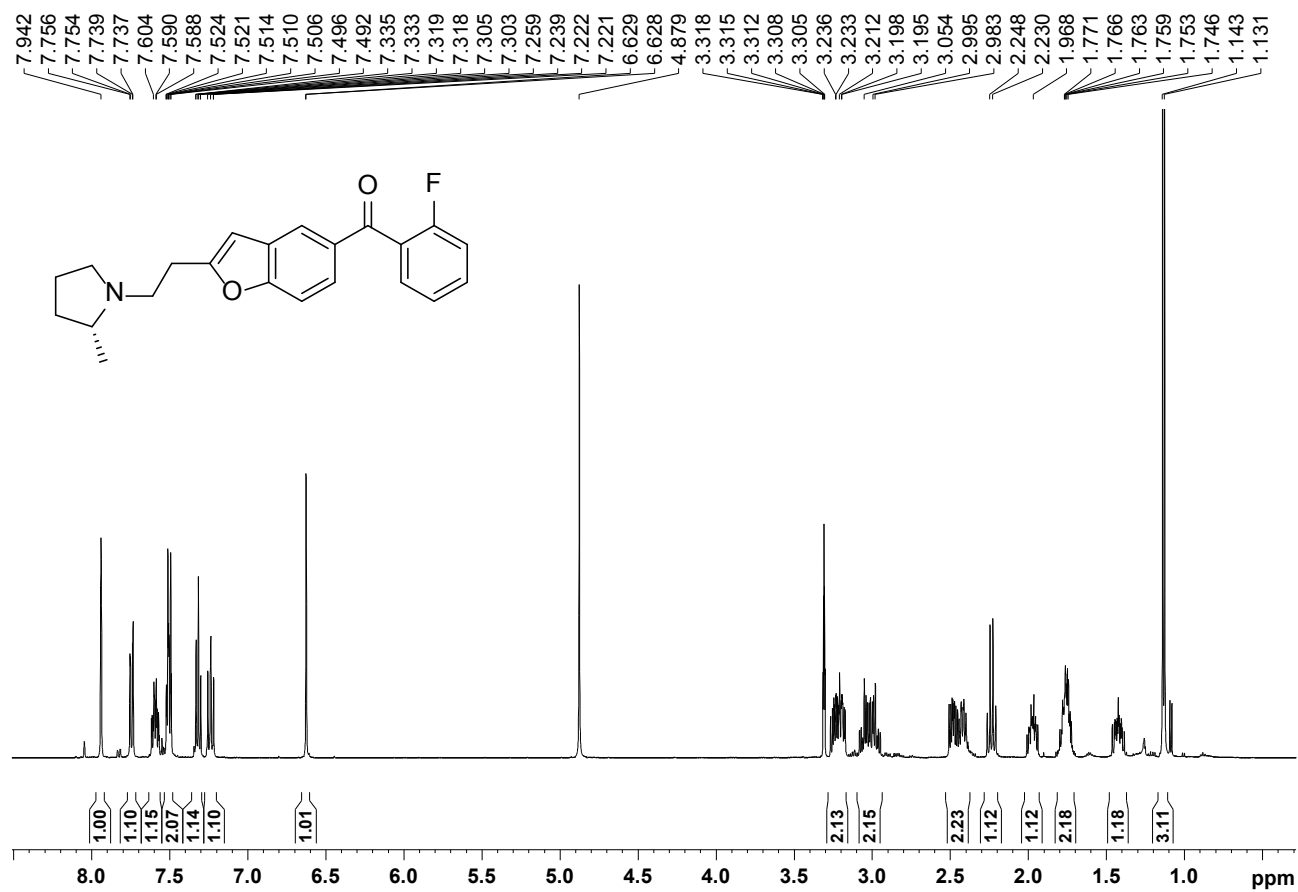

Figure 3. <sup>1</sup>H NMR (500MHz, CD<sub>3</sub>OD) of **5a**

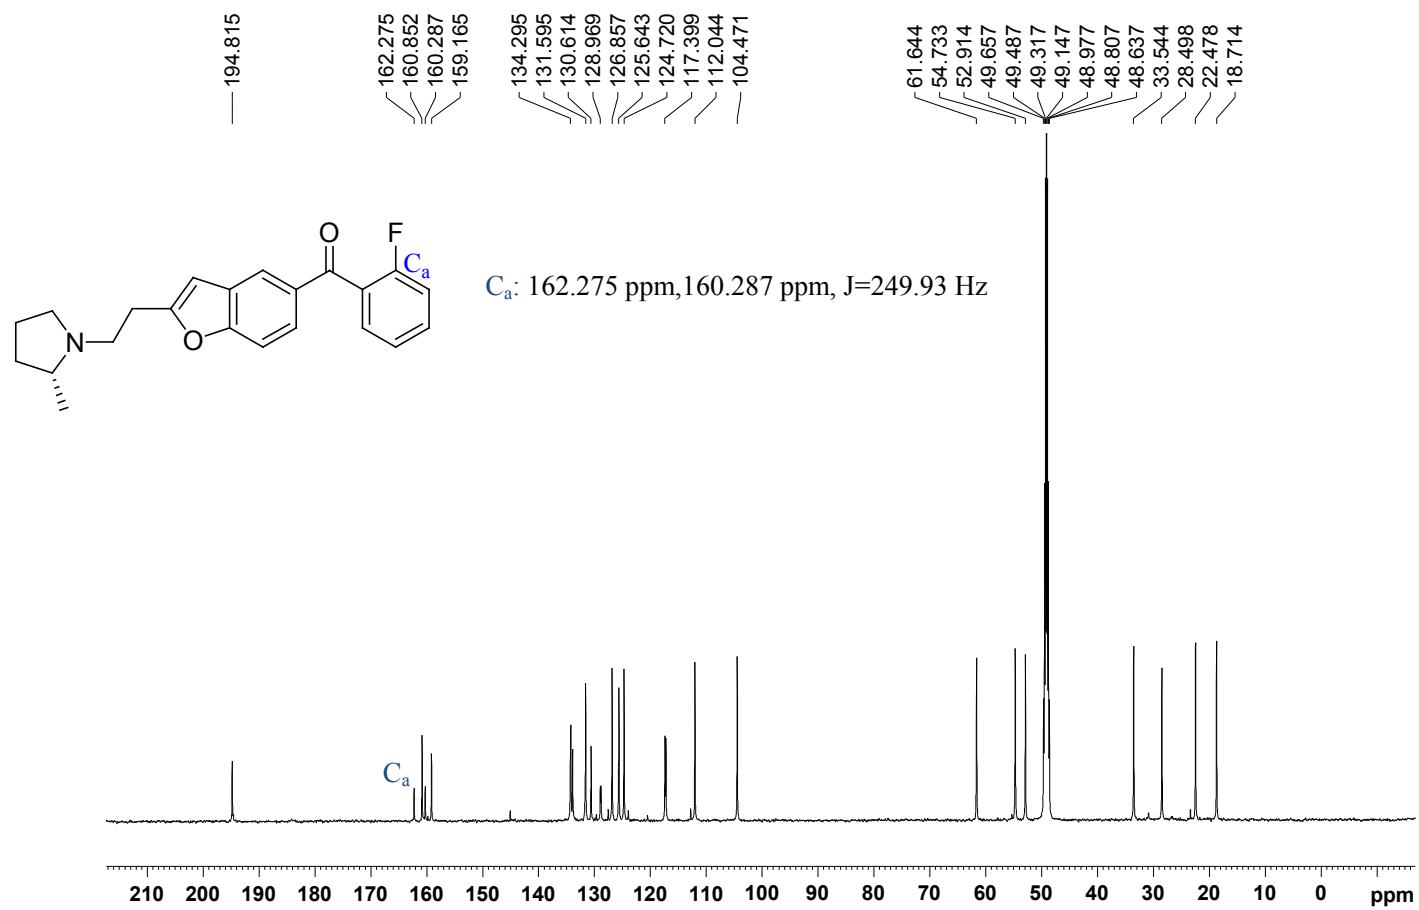

Figure 4.  $^{13}\text{C}$  NMR (125MHz,  $\text{CD}_3\text{OD}$ ) of **5a**



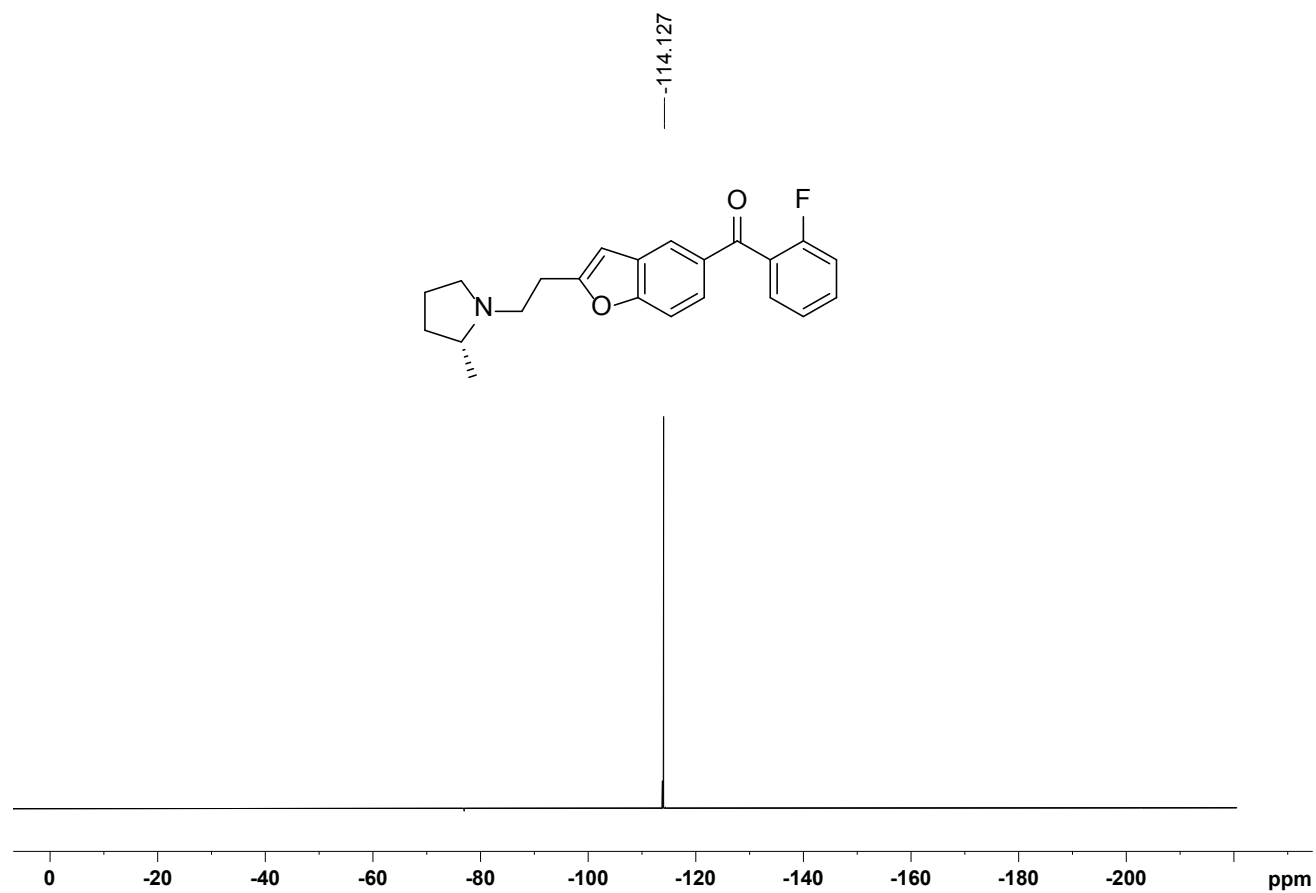

Figure 5.  $^{19}\text{F}$  NMR (475MHz,  $\text{CD}_3\text{OD}$ ) of **5a**

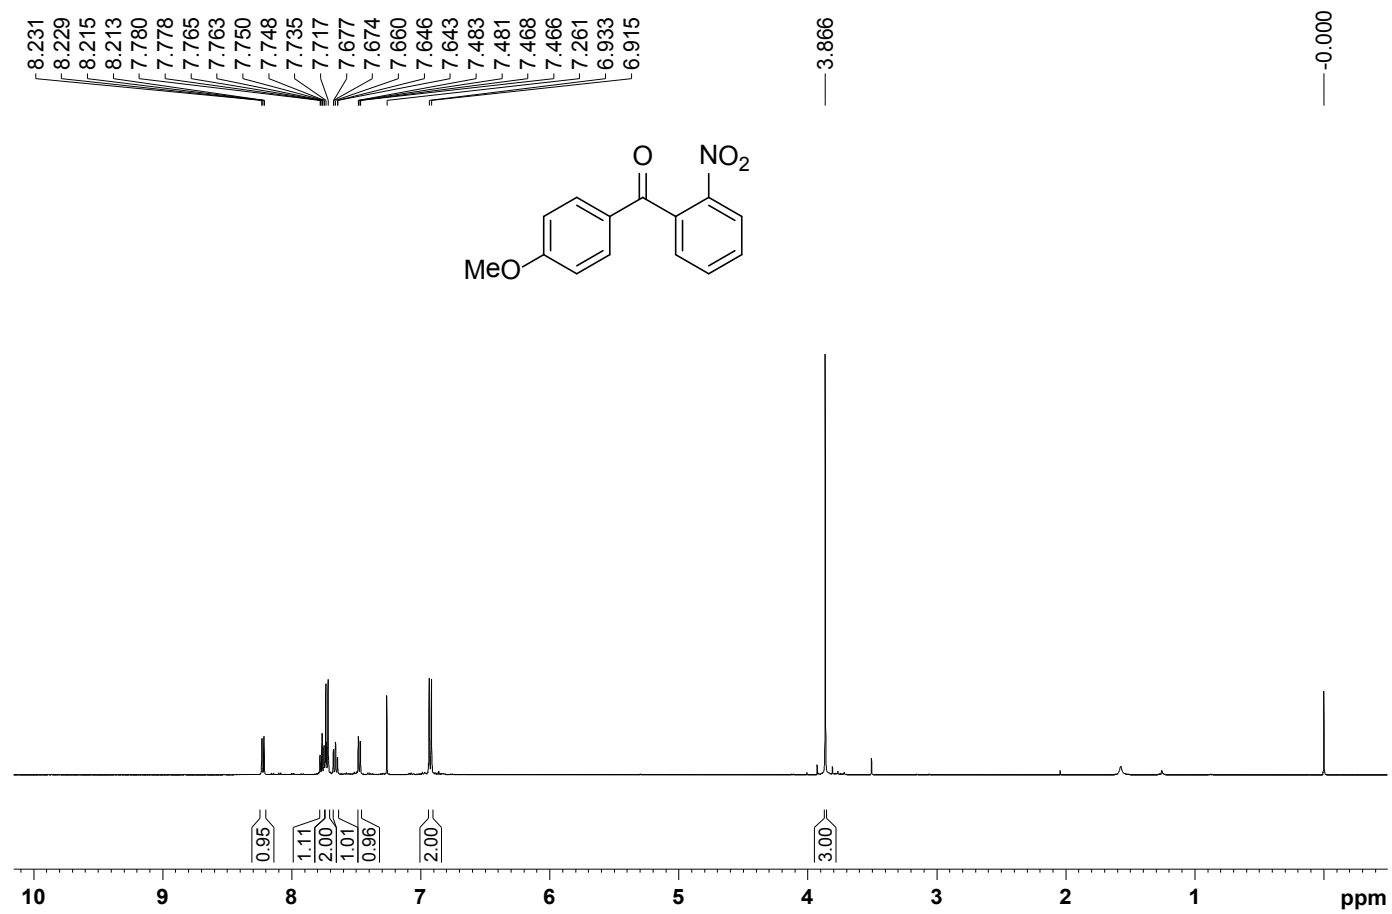

Figure 6. <sup>1</sup>H NMR (500MHz, CDCl<sub>3</sub>) of **2b**

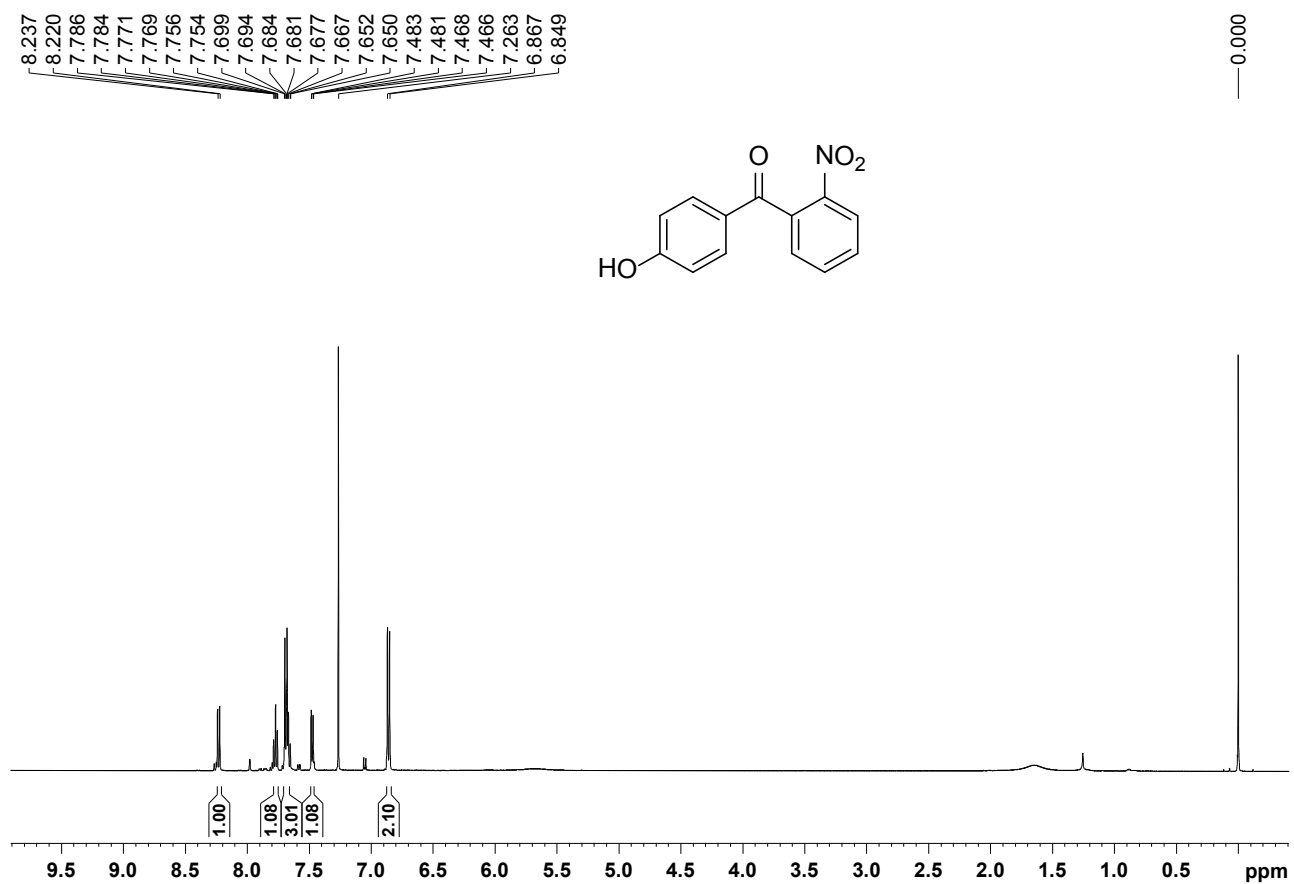

Figure 7.  $^1\text{H}$  NMR (500MHz,  $\text{CDCl}_3$ ) of **3b**

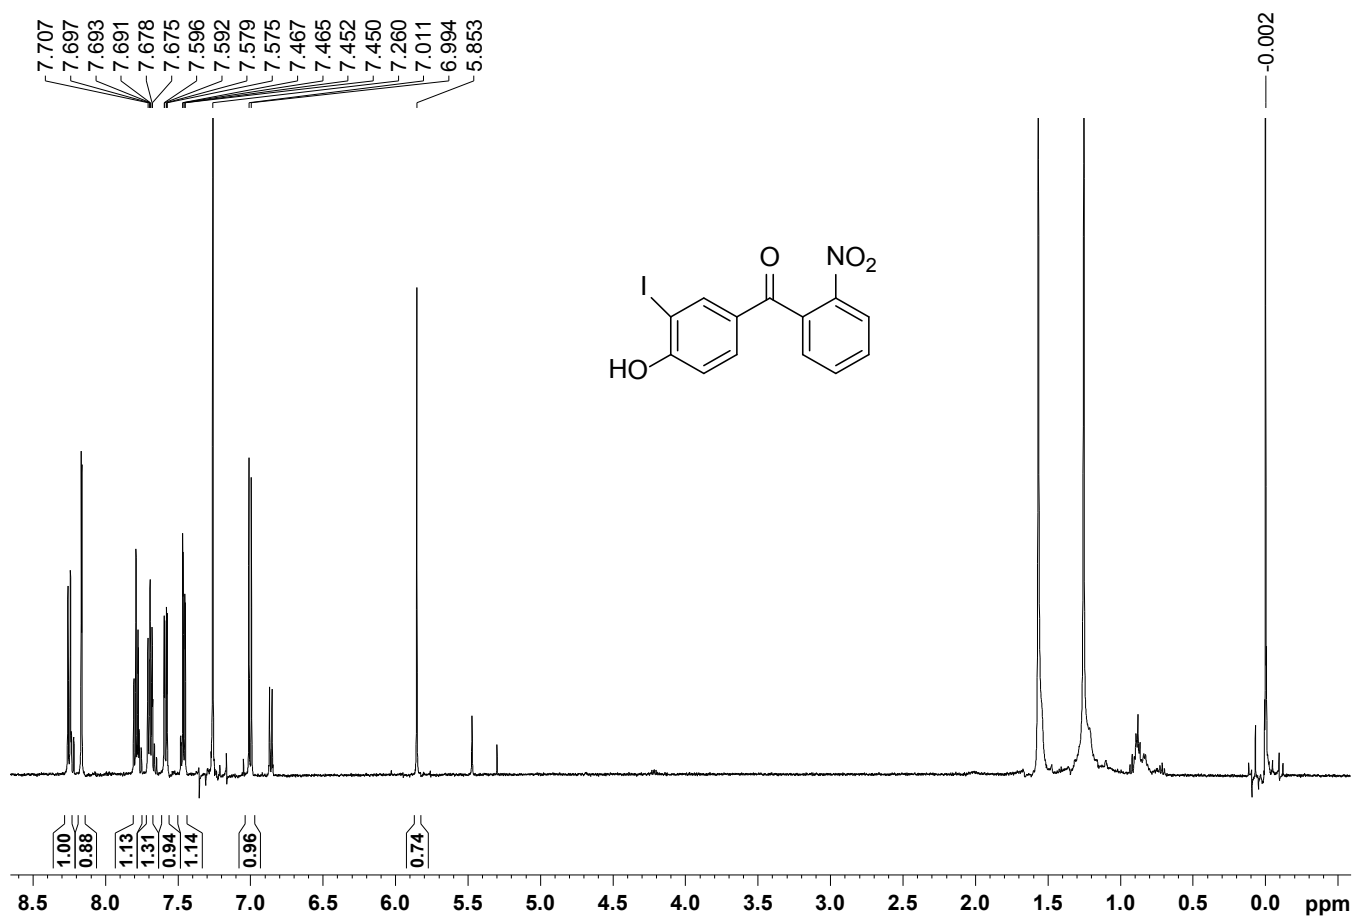

Figure 8.  $^1\text{H}$  NMR (500MHz,  $\text{CDCl}_3$ ) of **4b**

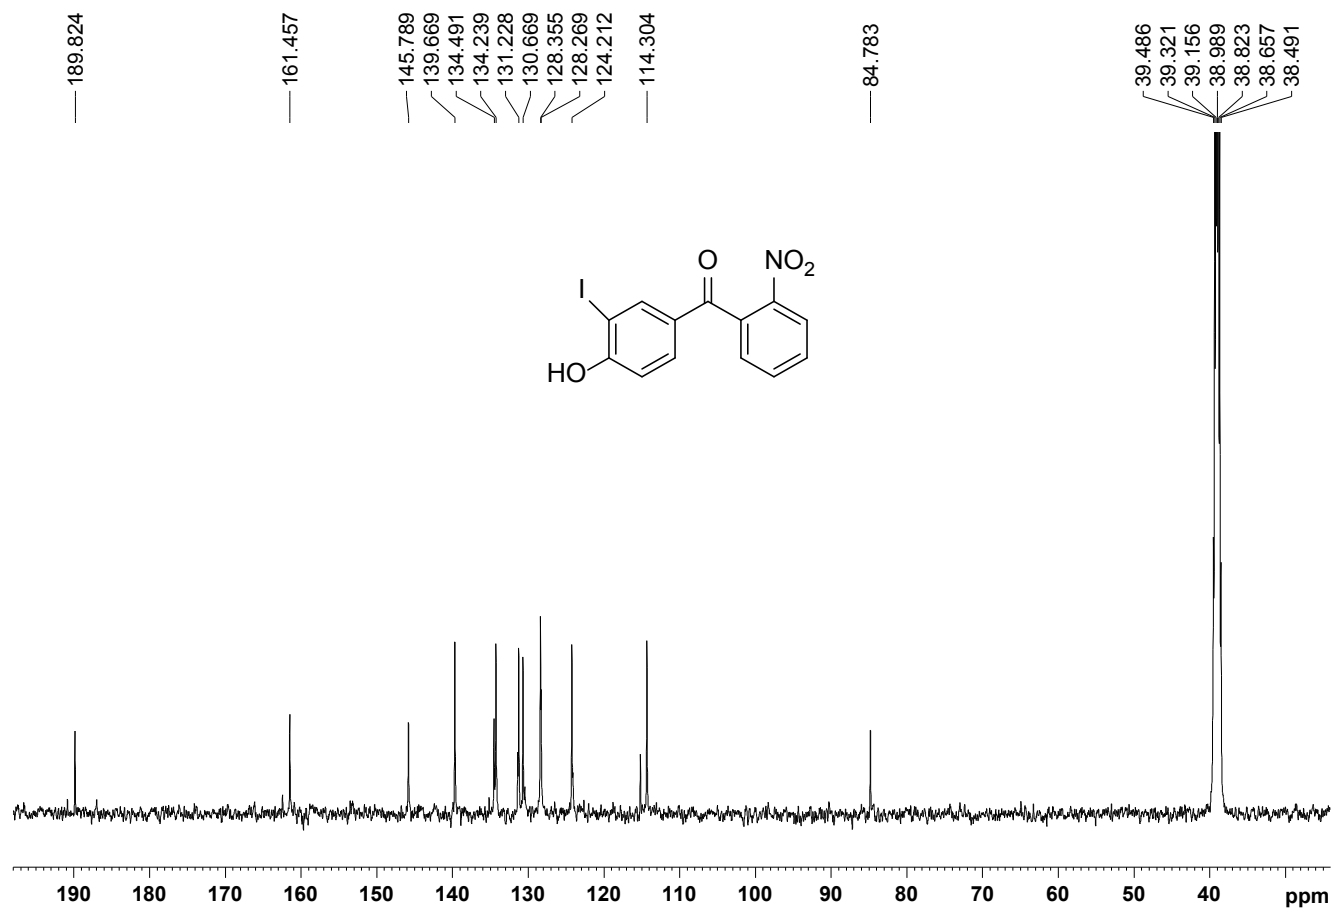

Figure 9.  $^{13}\text{C}$  NMR (125MHz, DMSO- $\text{d}_6$ ) of **4b**

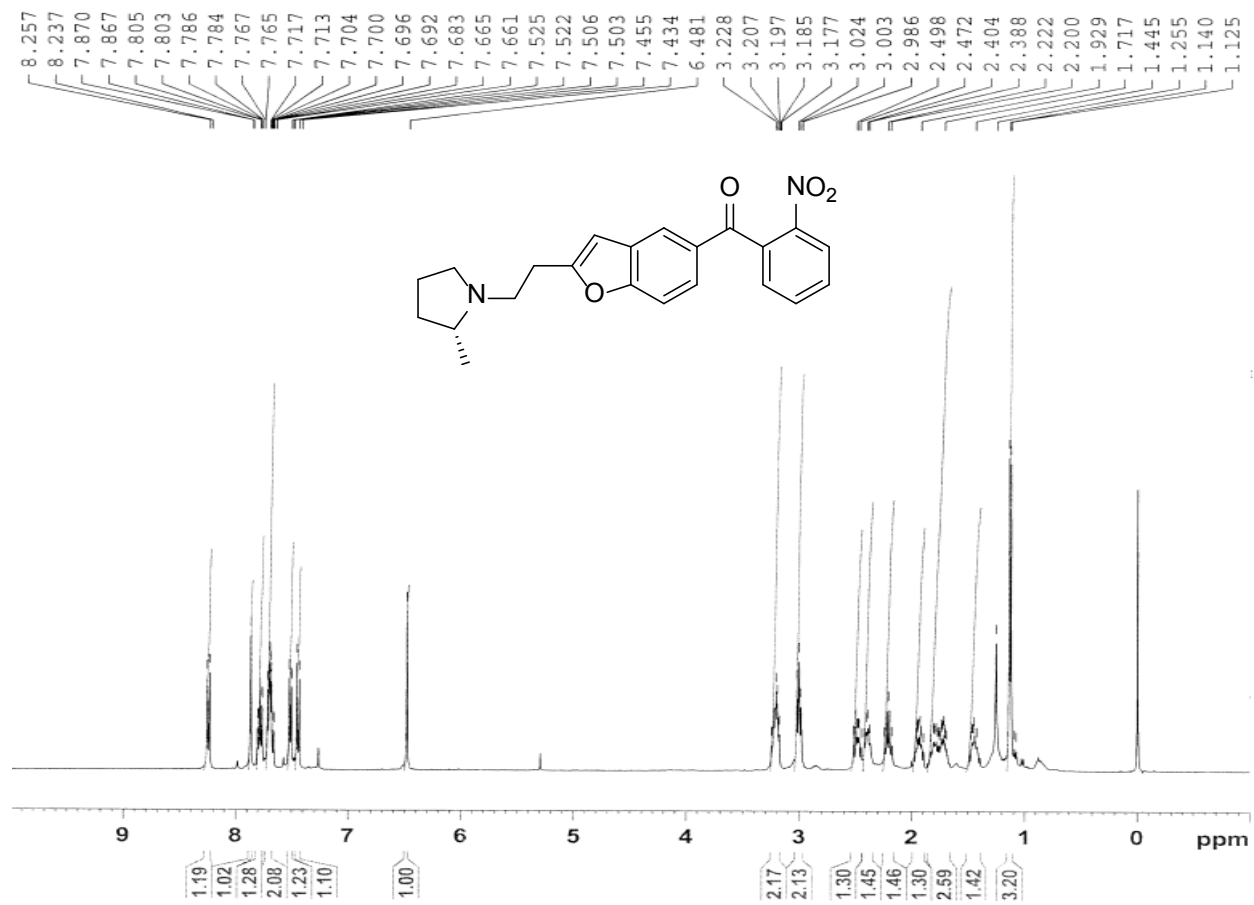

Figure 10. <sup>1</sup>H NMR (400MHz, CDCl<sub>3</sub>) of **5b**

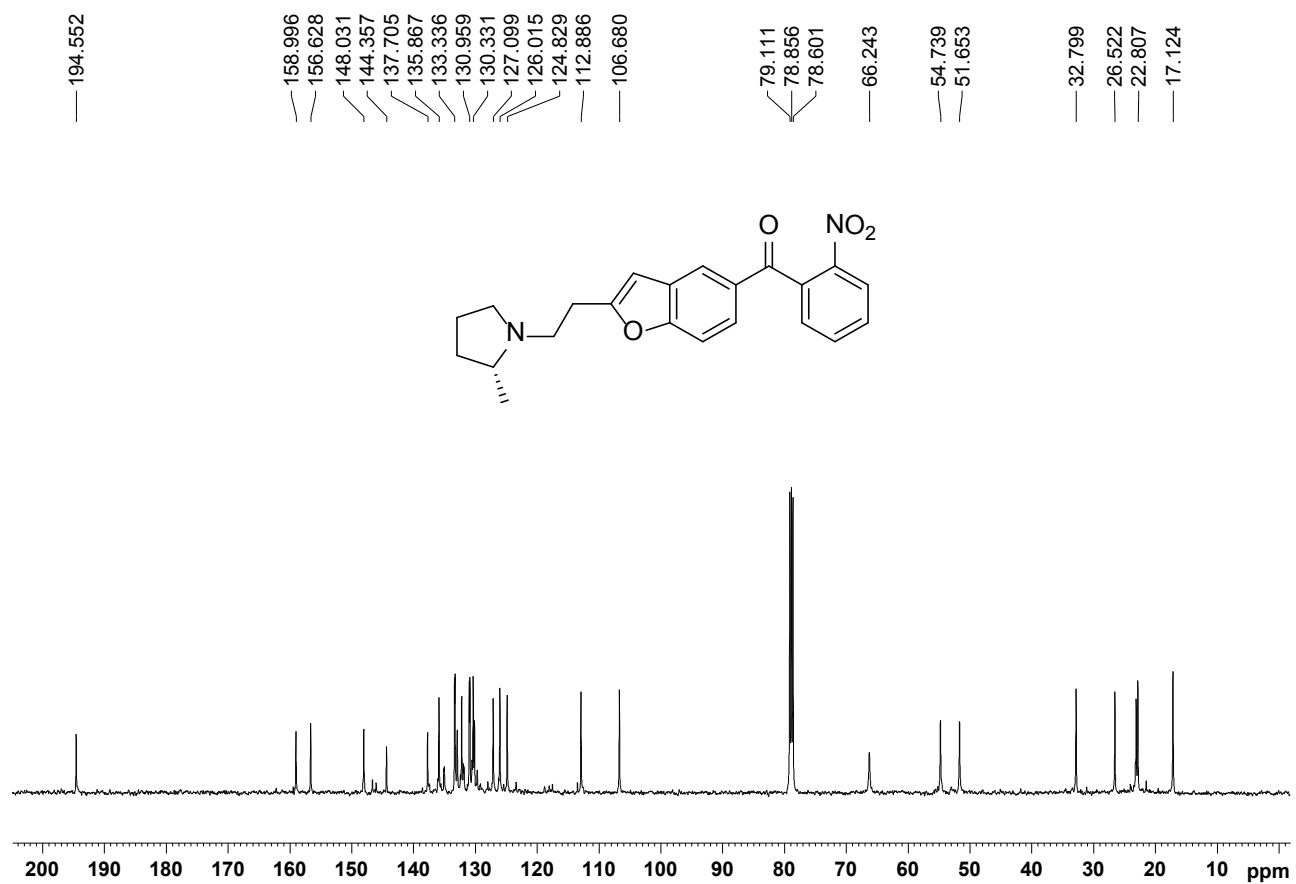

Figure 11. <sup>13</sup>C NMR (125MHz, CDCl<sub>3</sub>) of **5b**

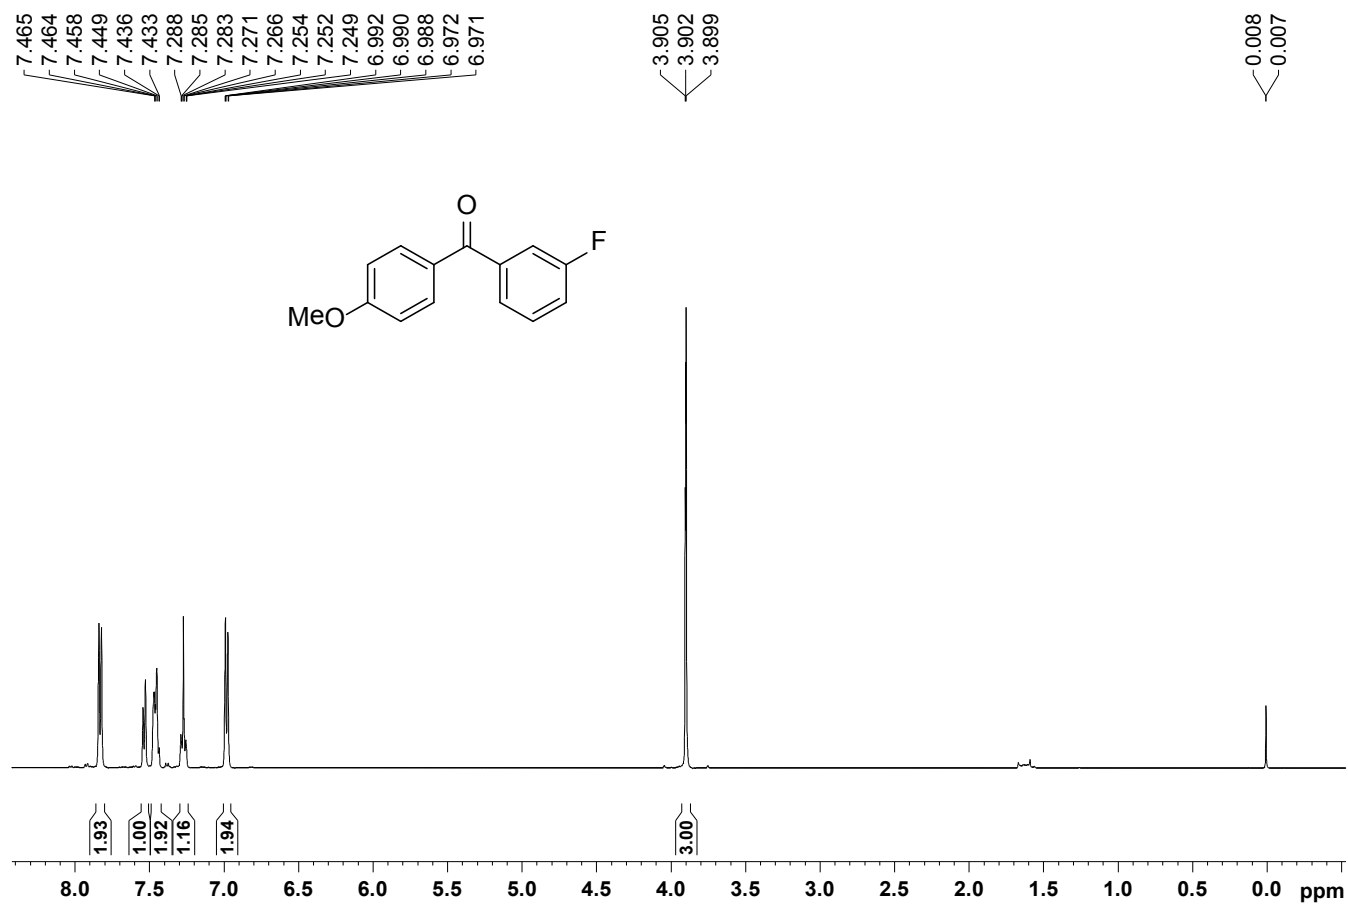

Figure 12. <sup>1</sup>H NMR (500MHz, CDCl<sub>3</sub>) of **2c**



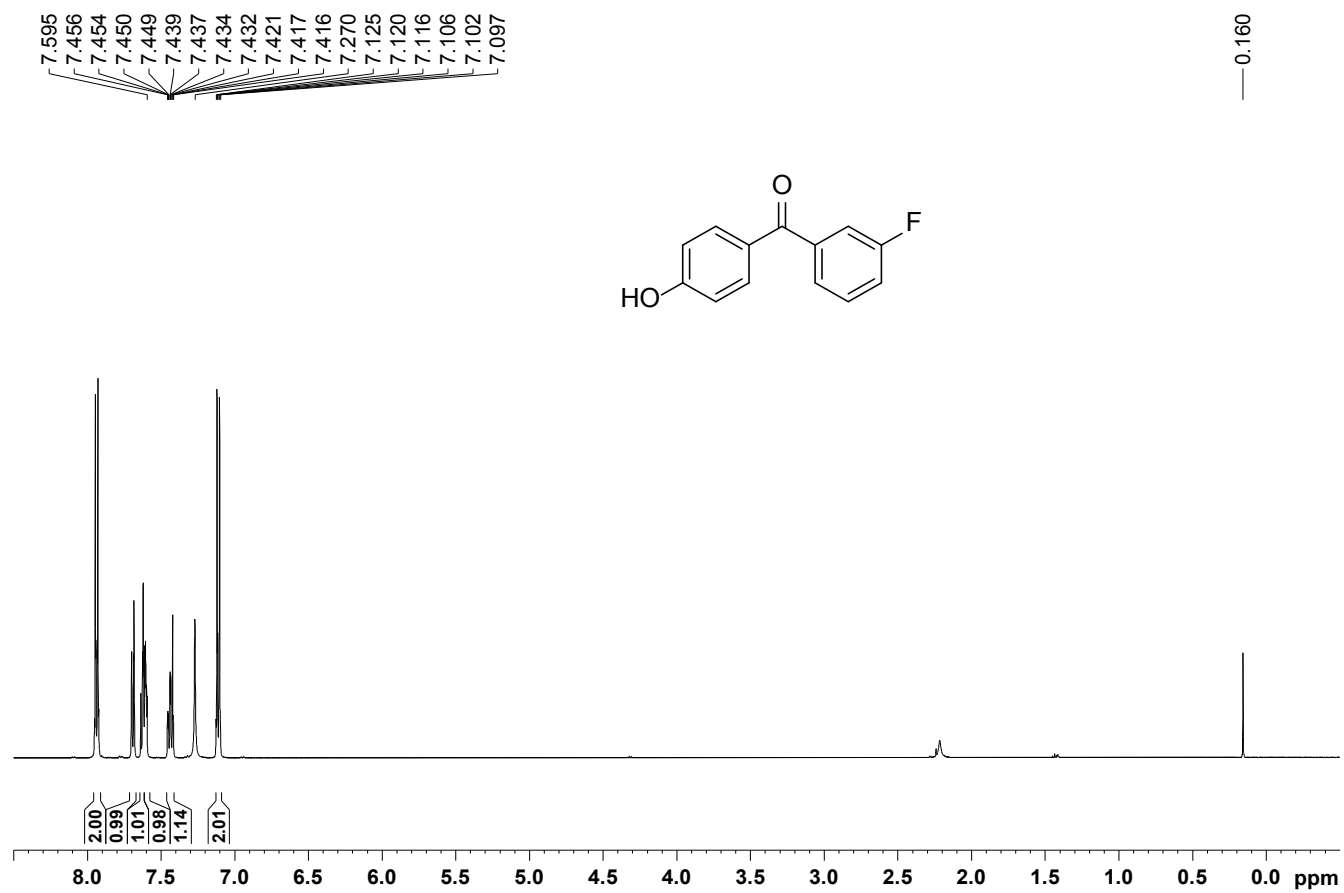

Figure 13. <sup>1</sup>H NMR (500MHz, CDCl<sub>3</sub>) of **3c**

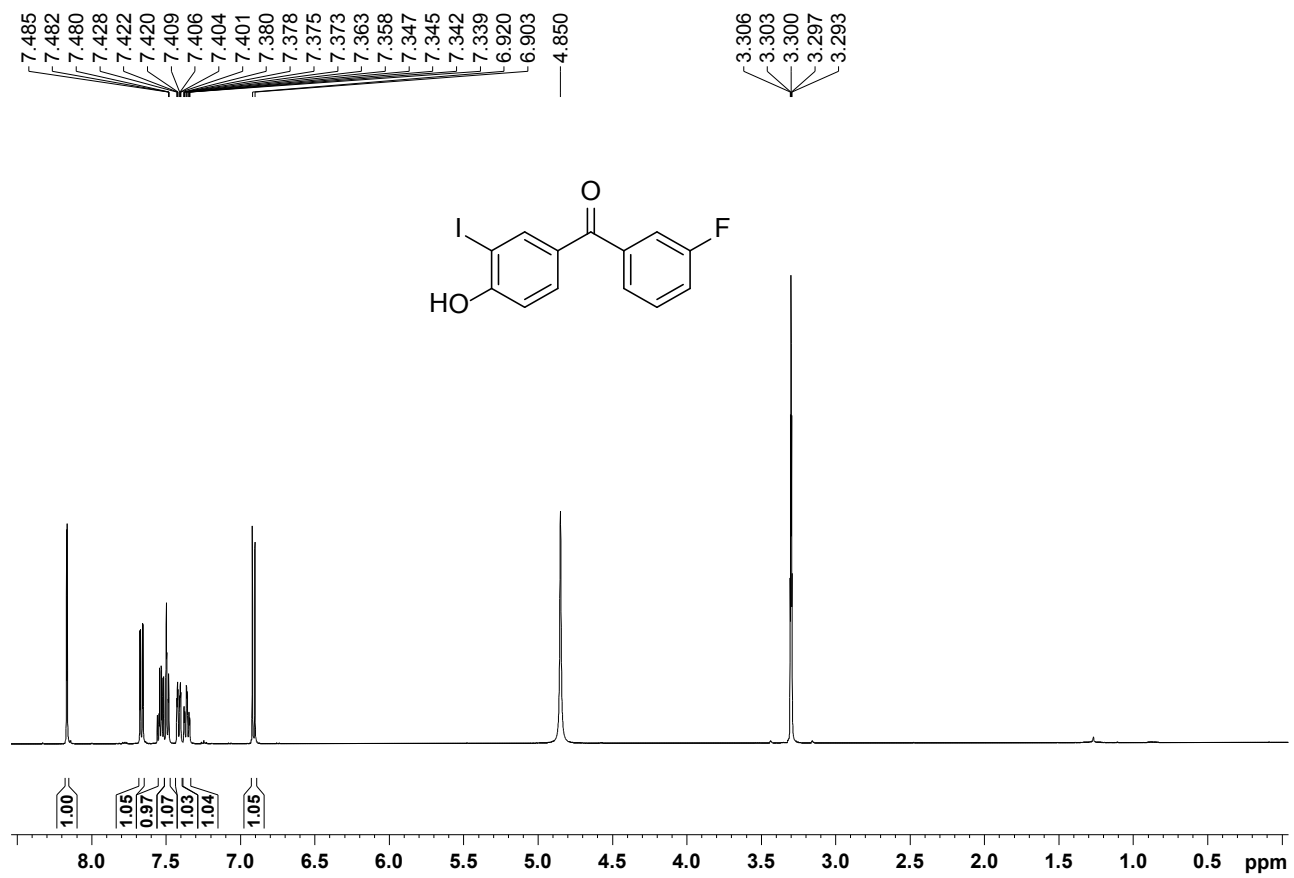

Figure 14. <sup>1</sup>H NMR (500MHz, CD<sub>3</sub>OD) of 4c

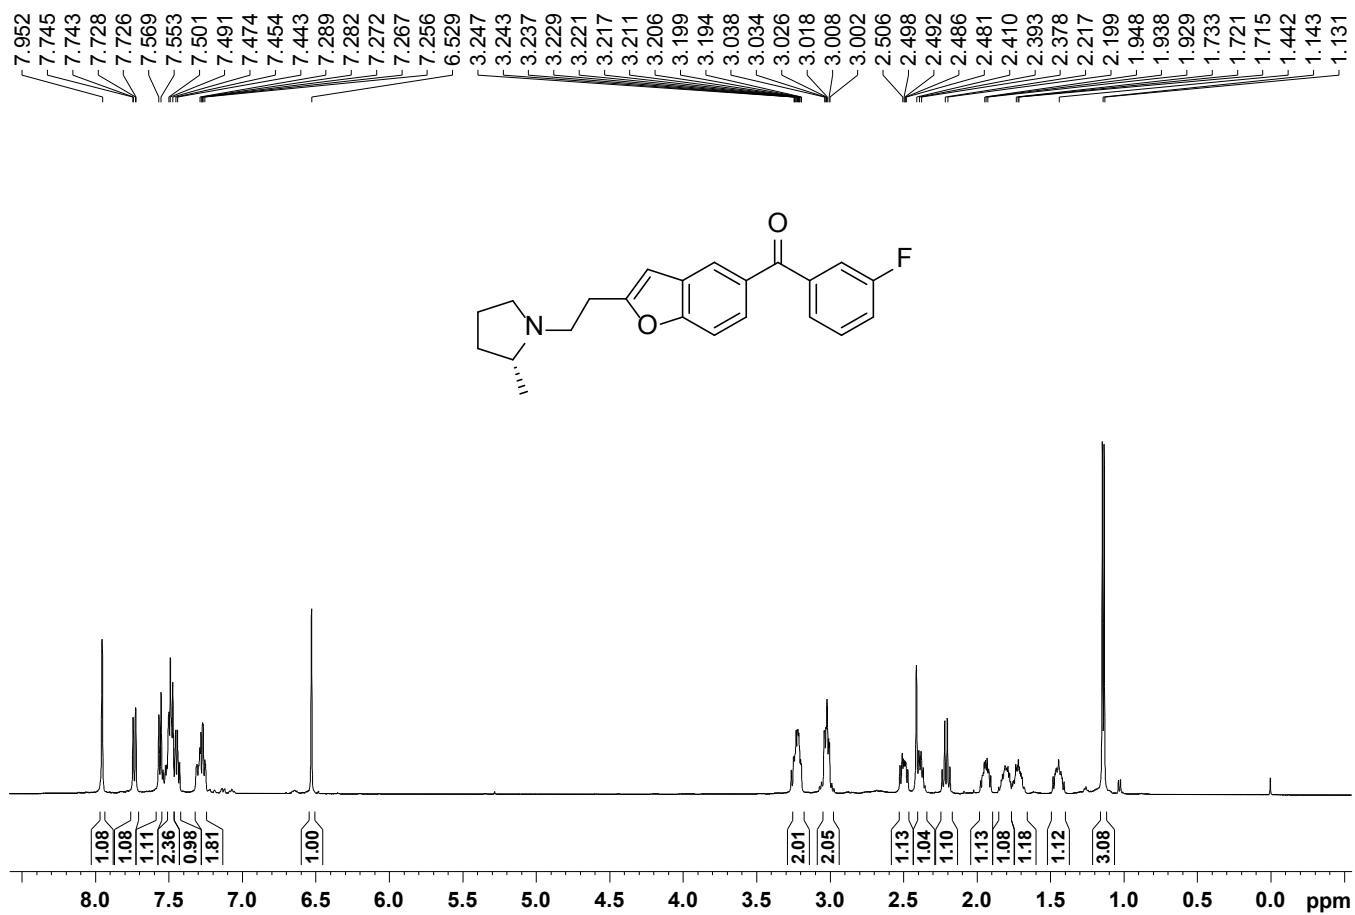

Figure 15. <sup>1</sup>H NMR (500MHz, CDCl<sub>3</sub>) of 5c

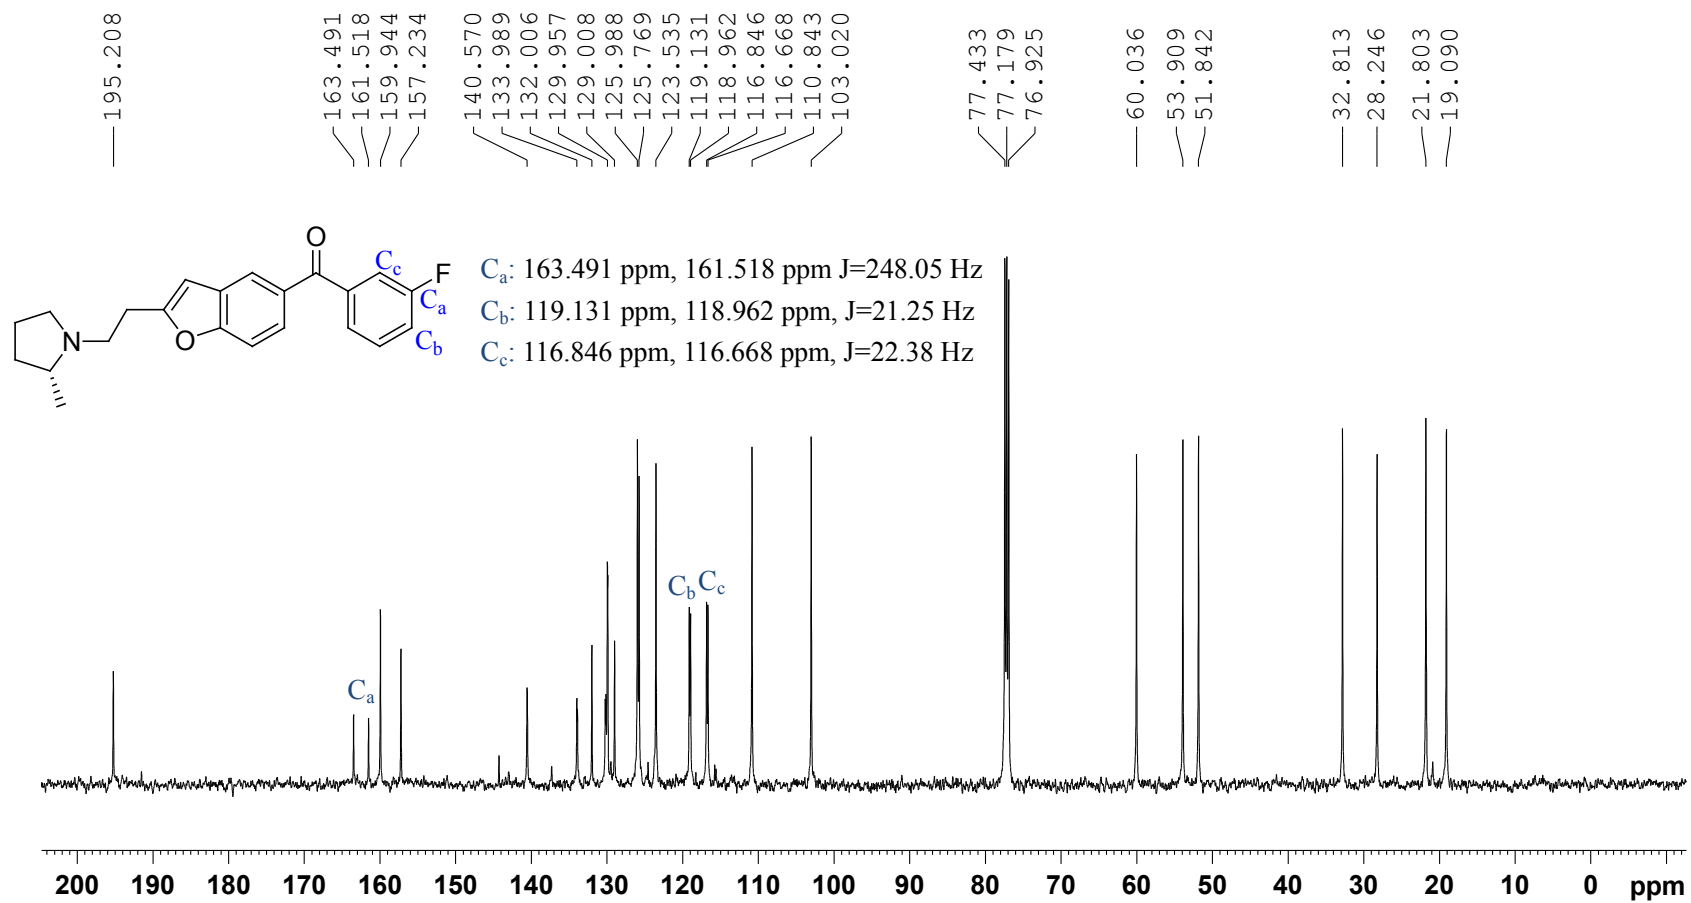

Figure 16.  $^{13}\text{C}$  NMR (125MHz,  $\text{CDCl}_3$ ) of **5c**

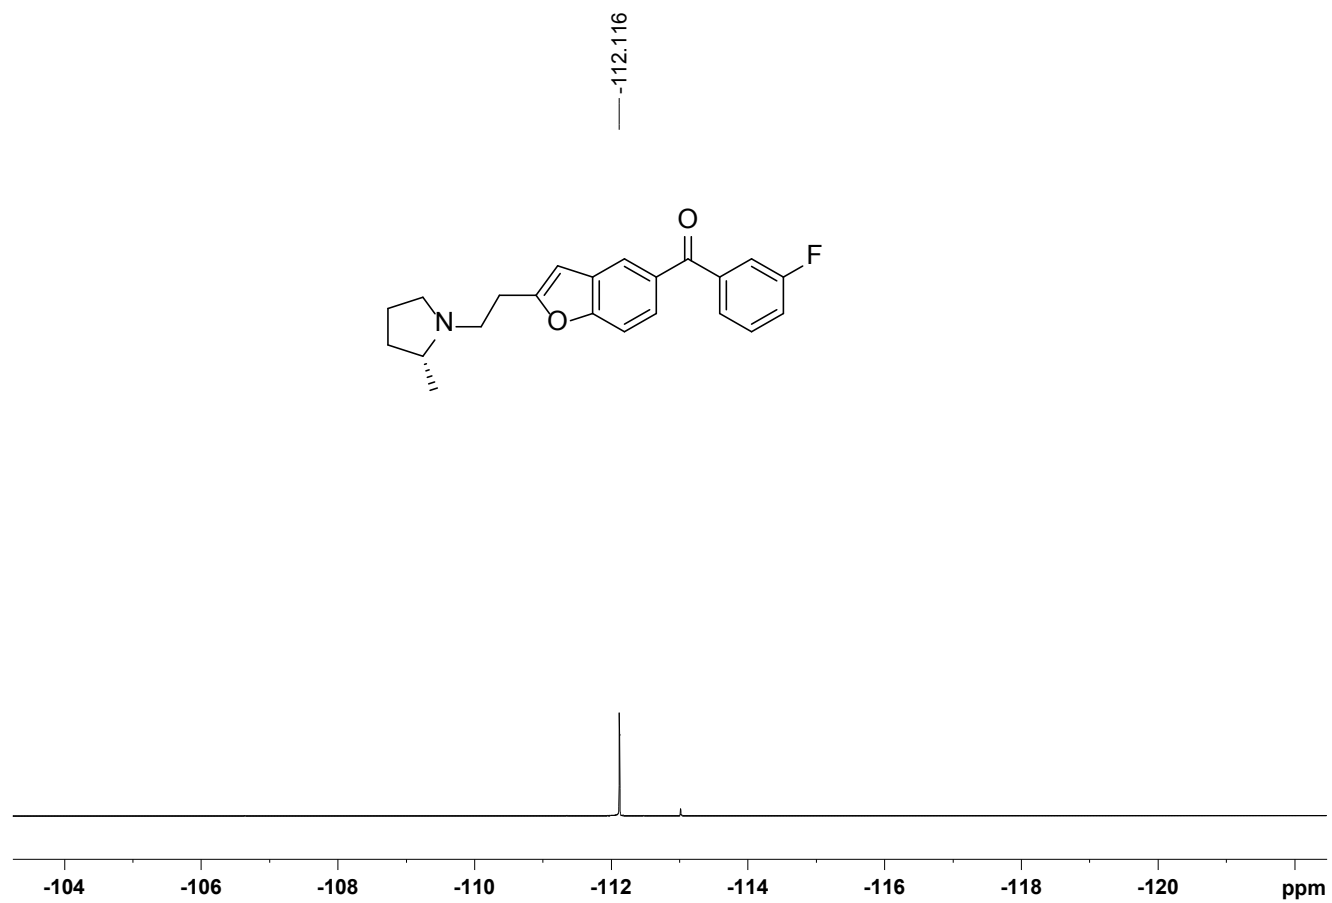

Figure 17.  $^{19}\text{F}$  NMR (470MHz,  $\text{CDCl}_3$ ) of **5c**

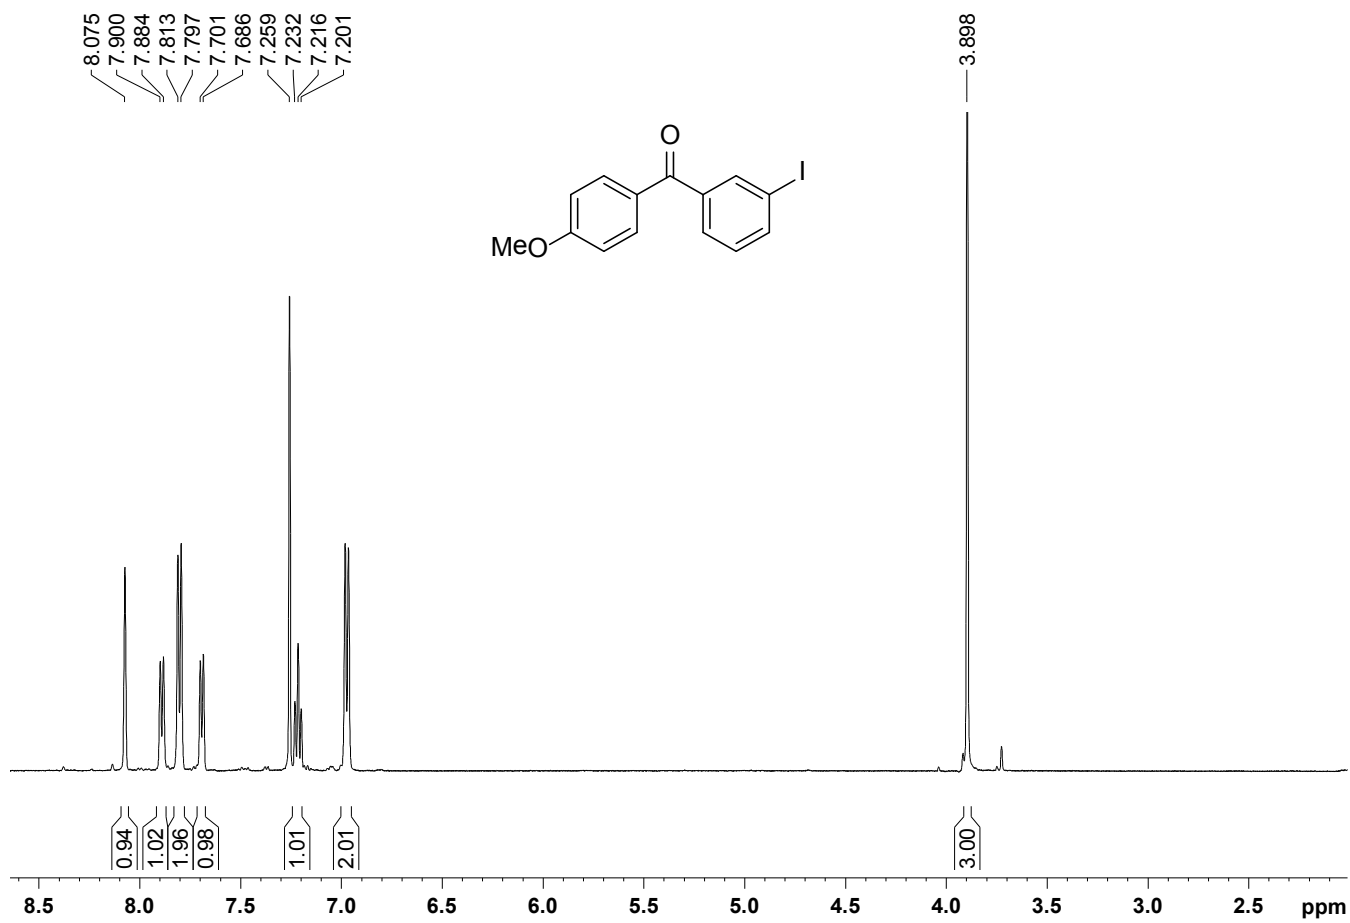

Figure 18. <sup>1</sup>H NMR (500 MHz, CDCl<sub>3</sub>) of **2d**

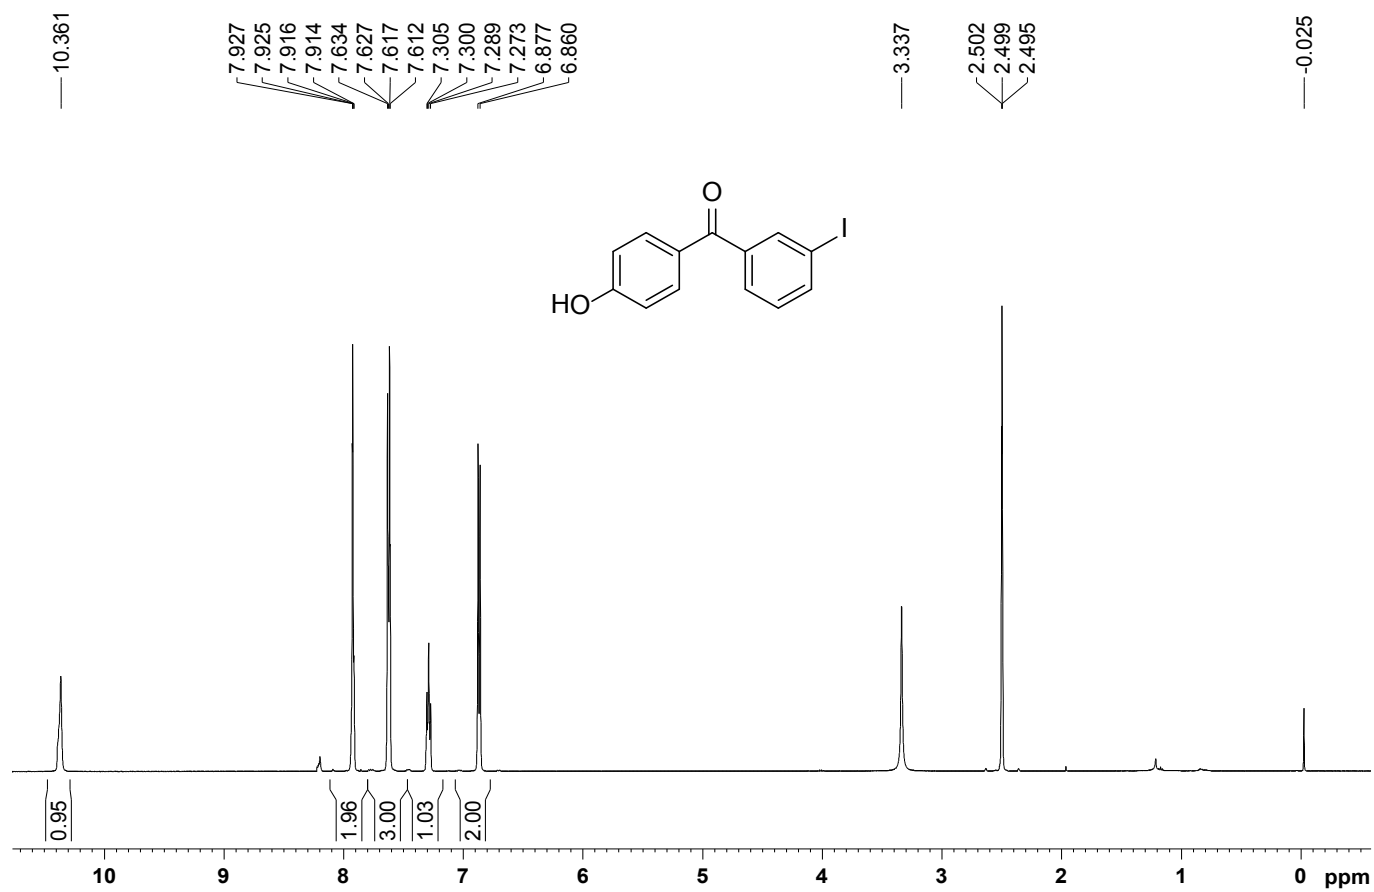

Figure 19.  $^1\text{H}$  NMR (500MHz,  $\text{CDCl}_3/\text{DMSO-d}_6$ ) of **3d**

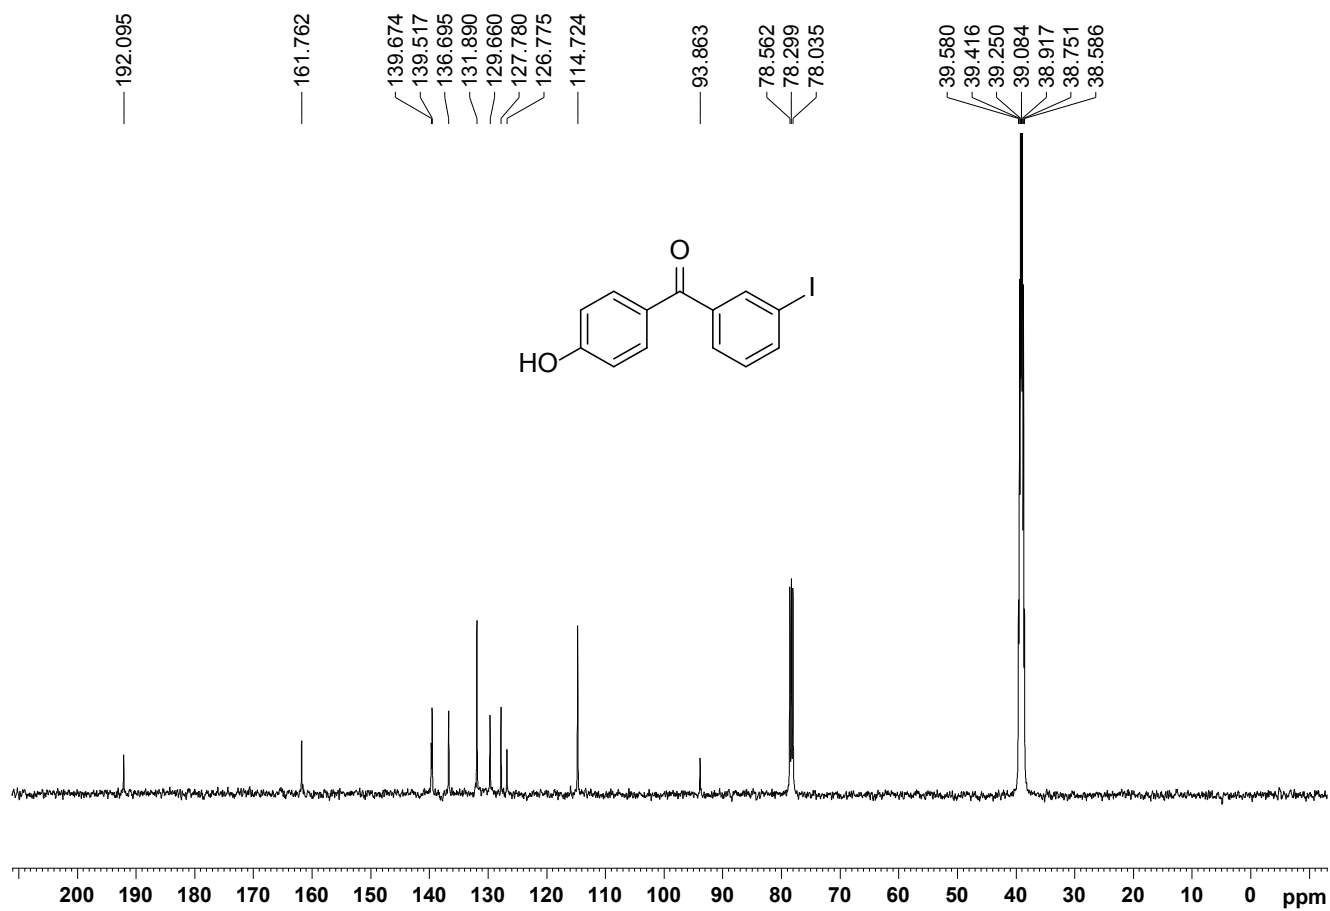

Figure 20.  $^{13}\text{C}$  NMR (125MHz,  $\text{CDCl}_3/\text{DMSO-d}_6$ ) of **3d**



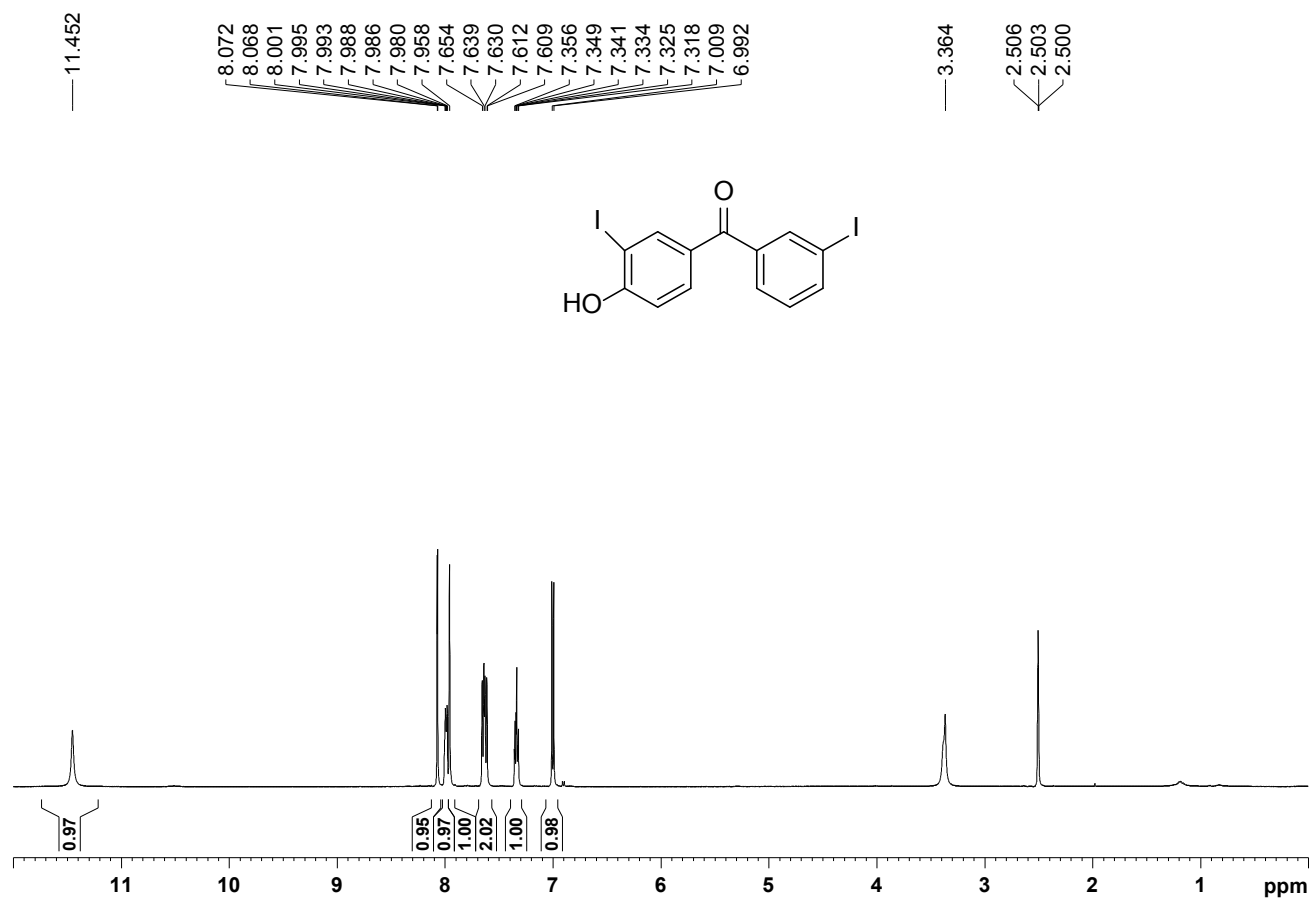

Figure 21. <sup>1</sup>H NMR (500MHz, DMSO-d<sub>6</sub>) of 4d

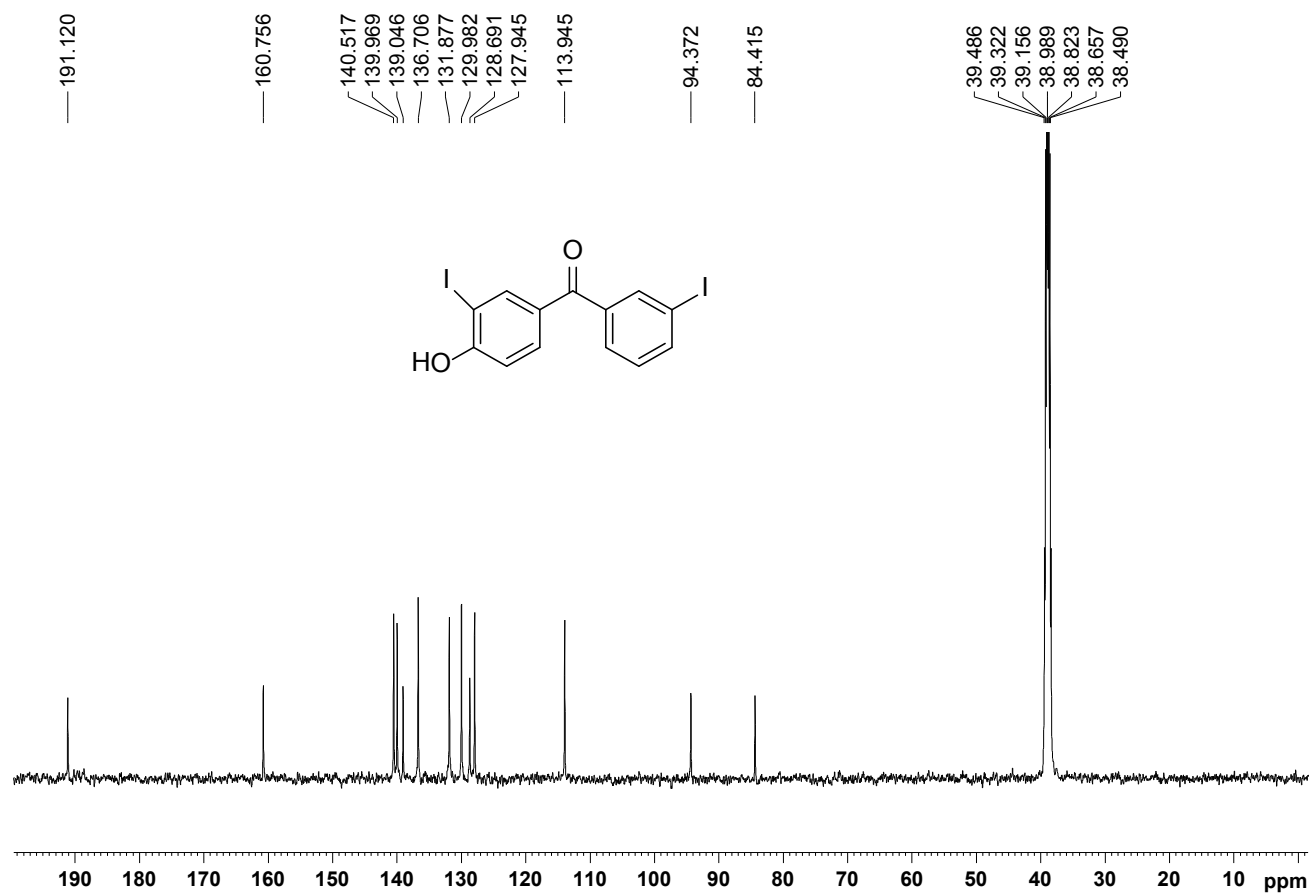

Figure 22.  $^{13}\text{C}$  NMR (125 MHz, DMSO- $d_6$ ) of **4d**

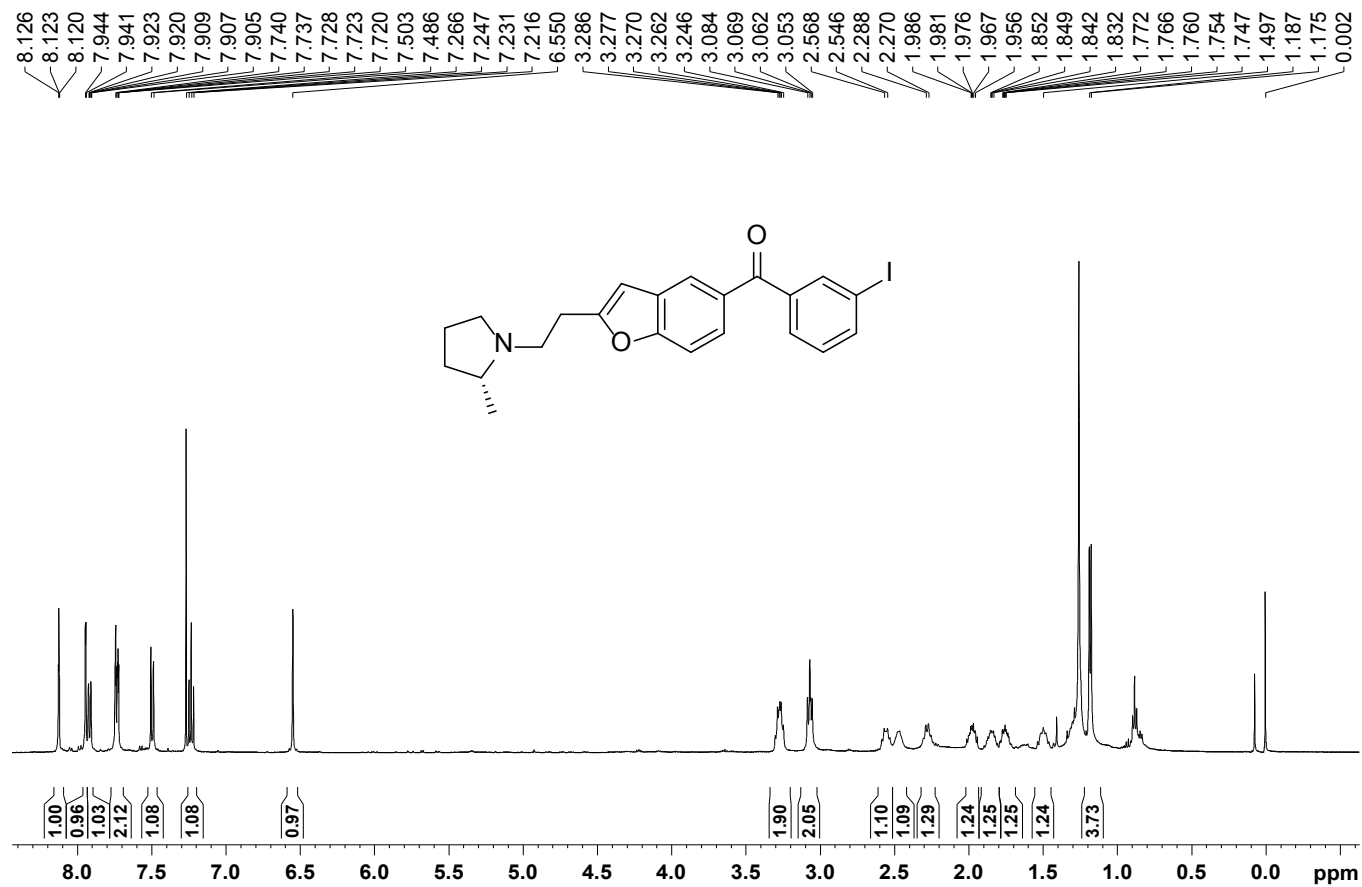

Figure 23. <sup>1</sup>H NMR (500MHz, CDCl<sub>3</sub>) of **5d**

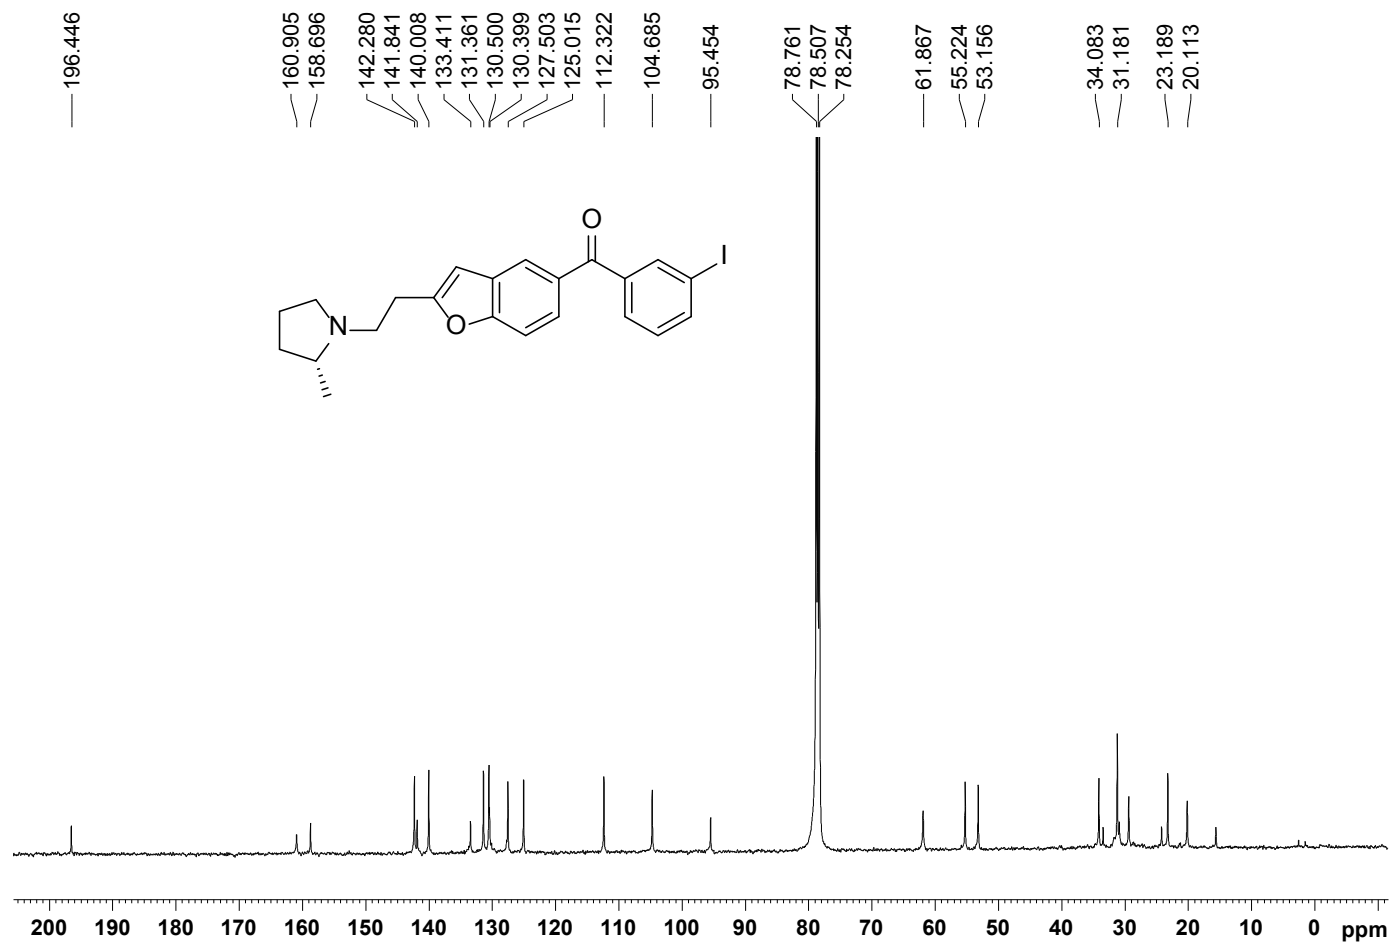

Figure 24.  $^{13}\text{C}$  NMR (125MHz,  $\text{CDCl}_3$ ) of **5d**

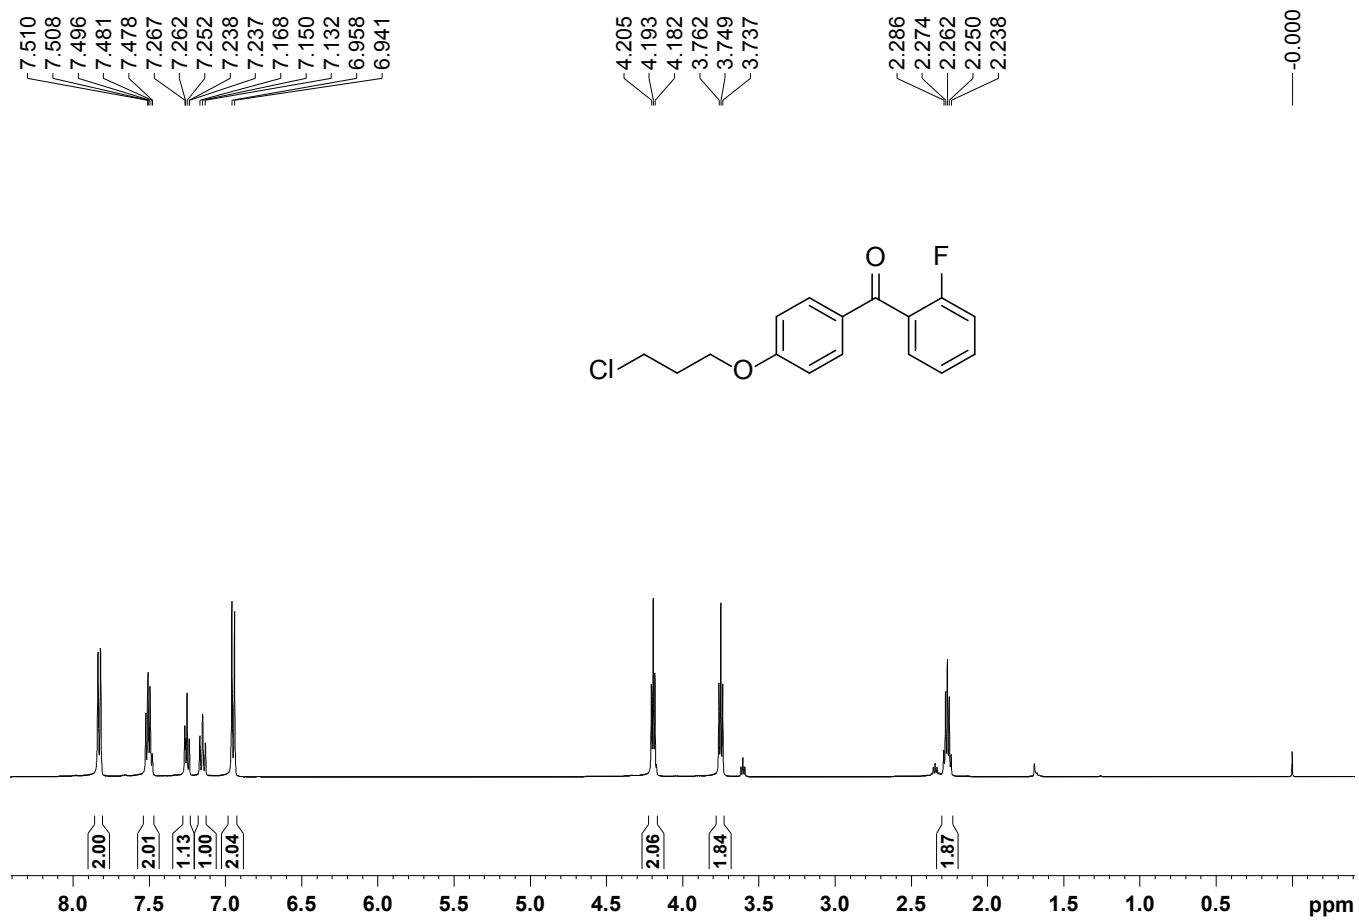

Figure 25. <sup>1</sup>H NMR (500MHz, CDCl<sub>3</sub>) of **6a**

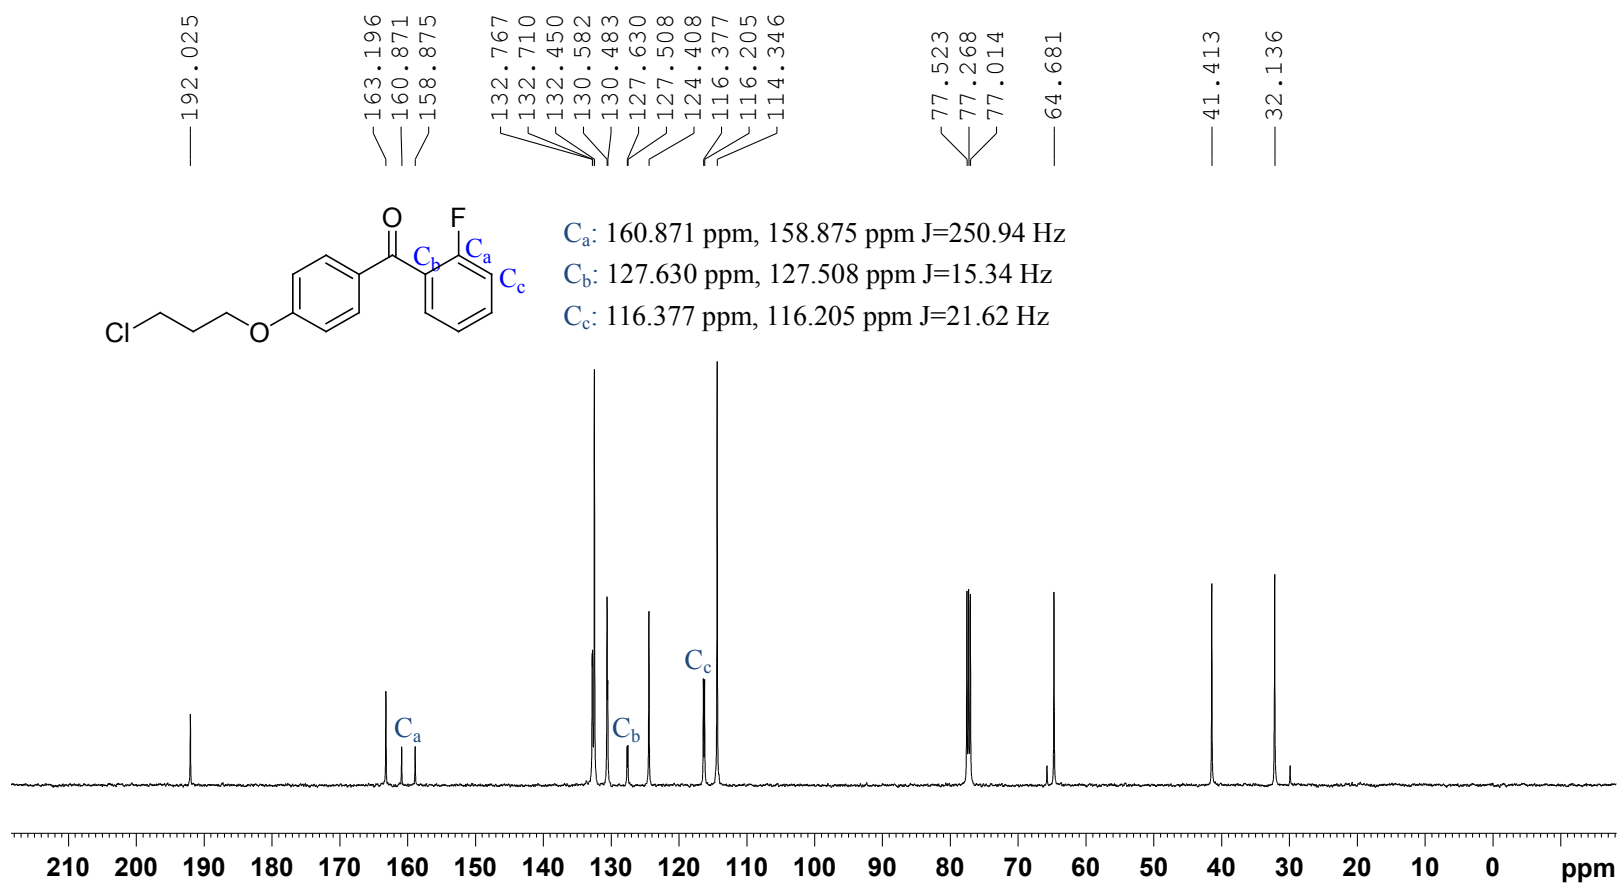

Figure 26.  $^{13}\text{C}$  NMR (125MHz,  $\text{CDCl}_3$ ) of **6a**

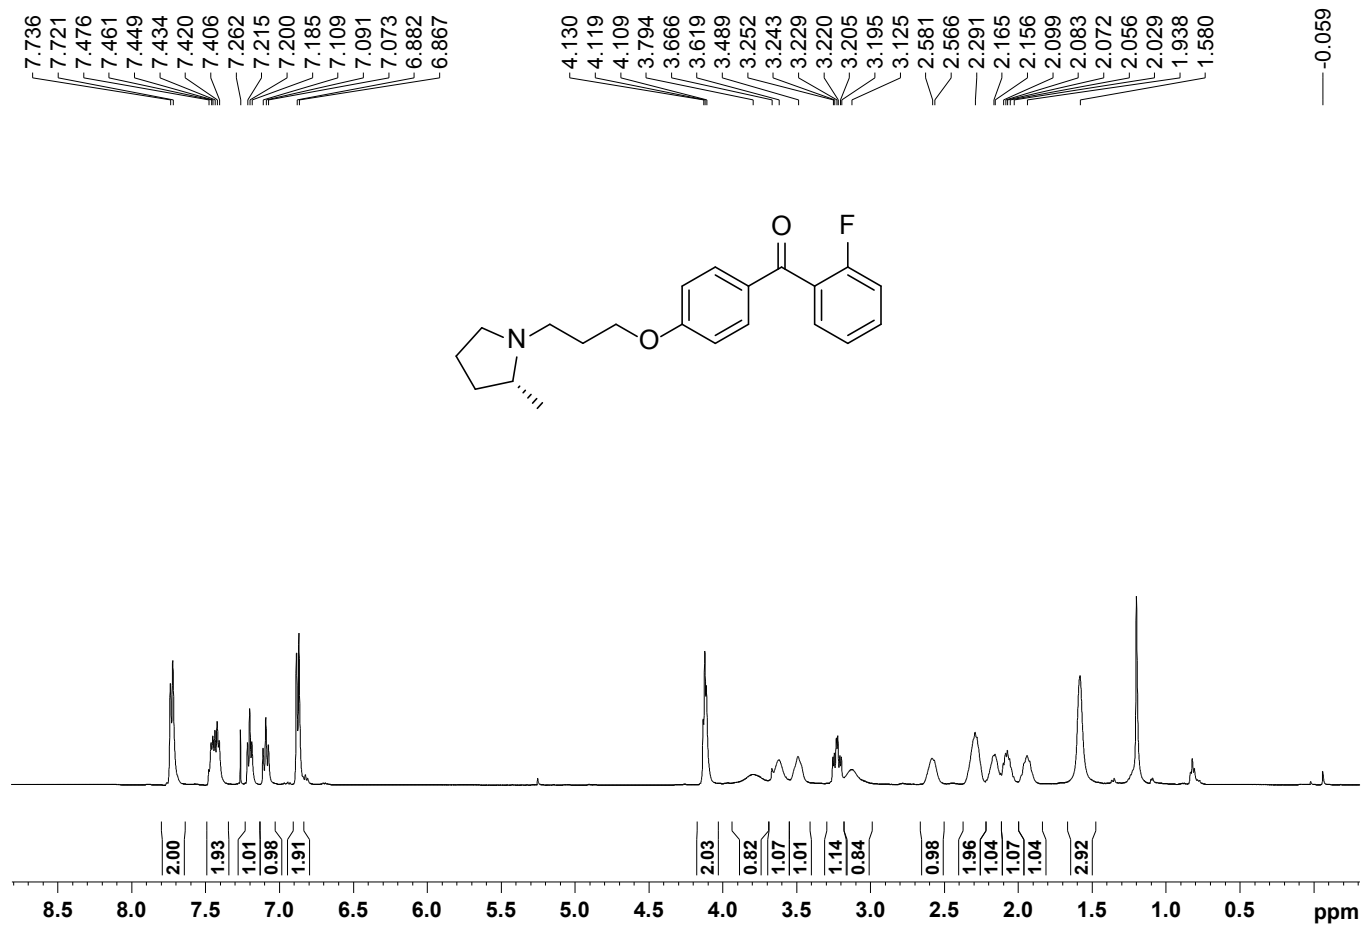

Figure 27. <sup>1</sup>H NMR (500MHz, CDCl<sub>3</sub>) of 7a

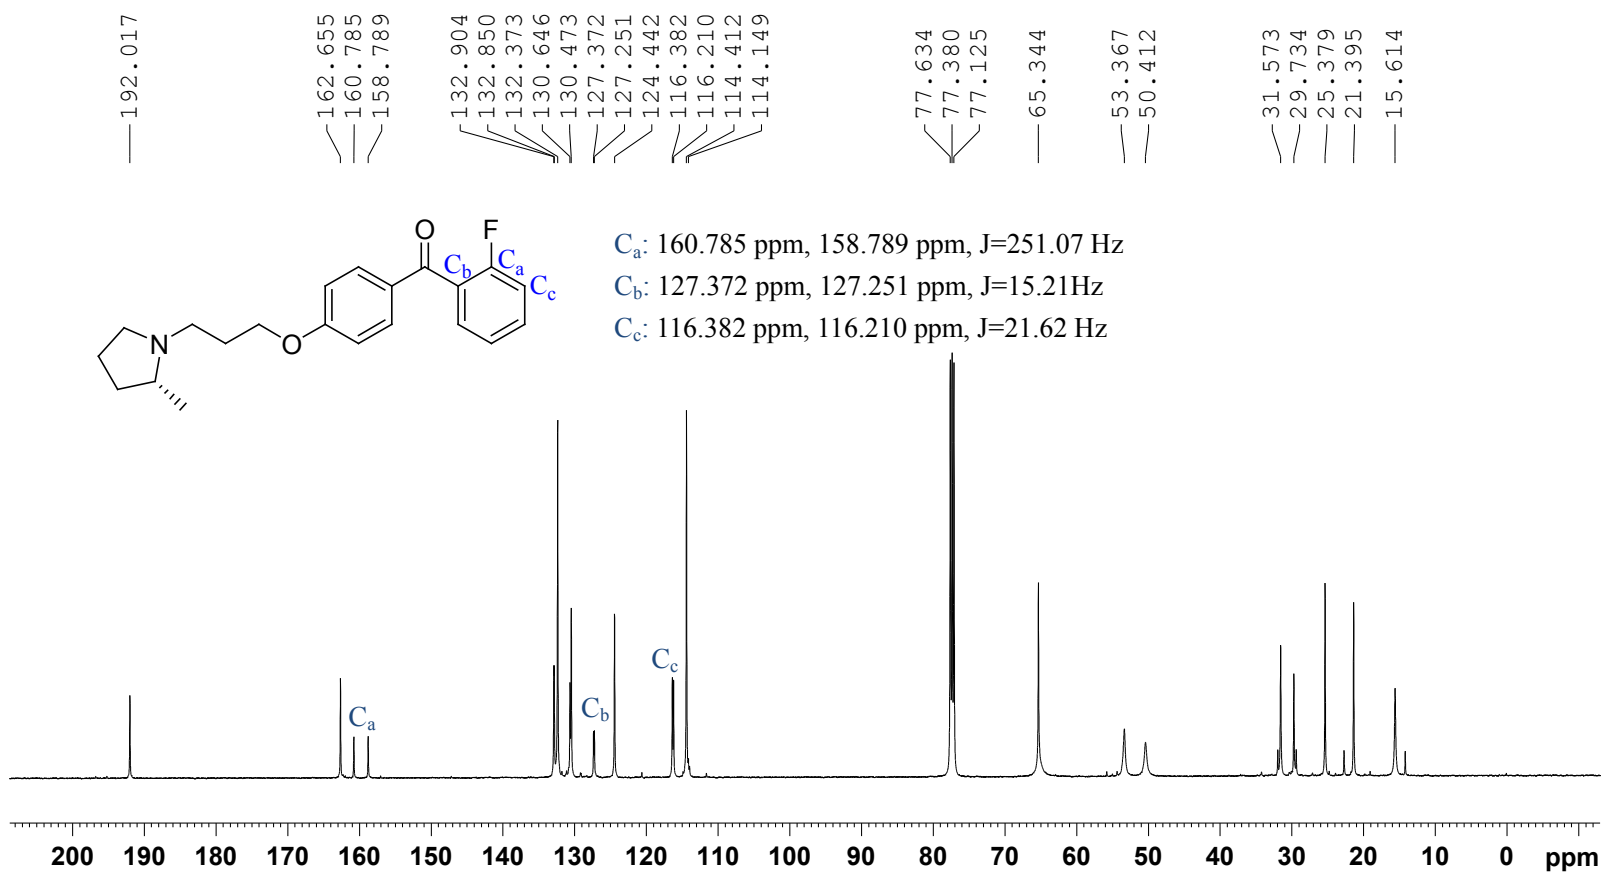

Figure 28.  $^{13}\text{C}$  NMR (125MHz,  $\text{CDCl}_3$ ) of **7a**



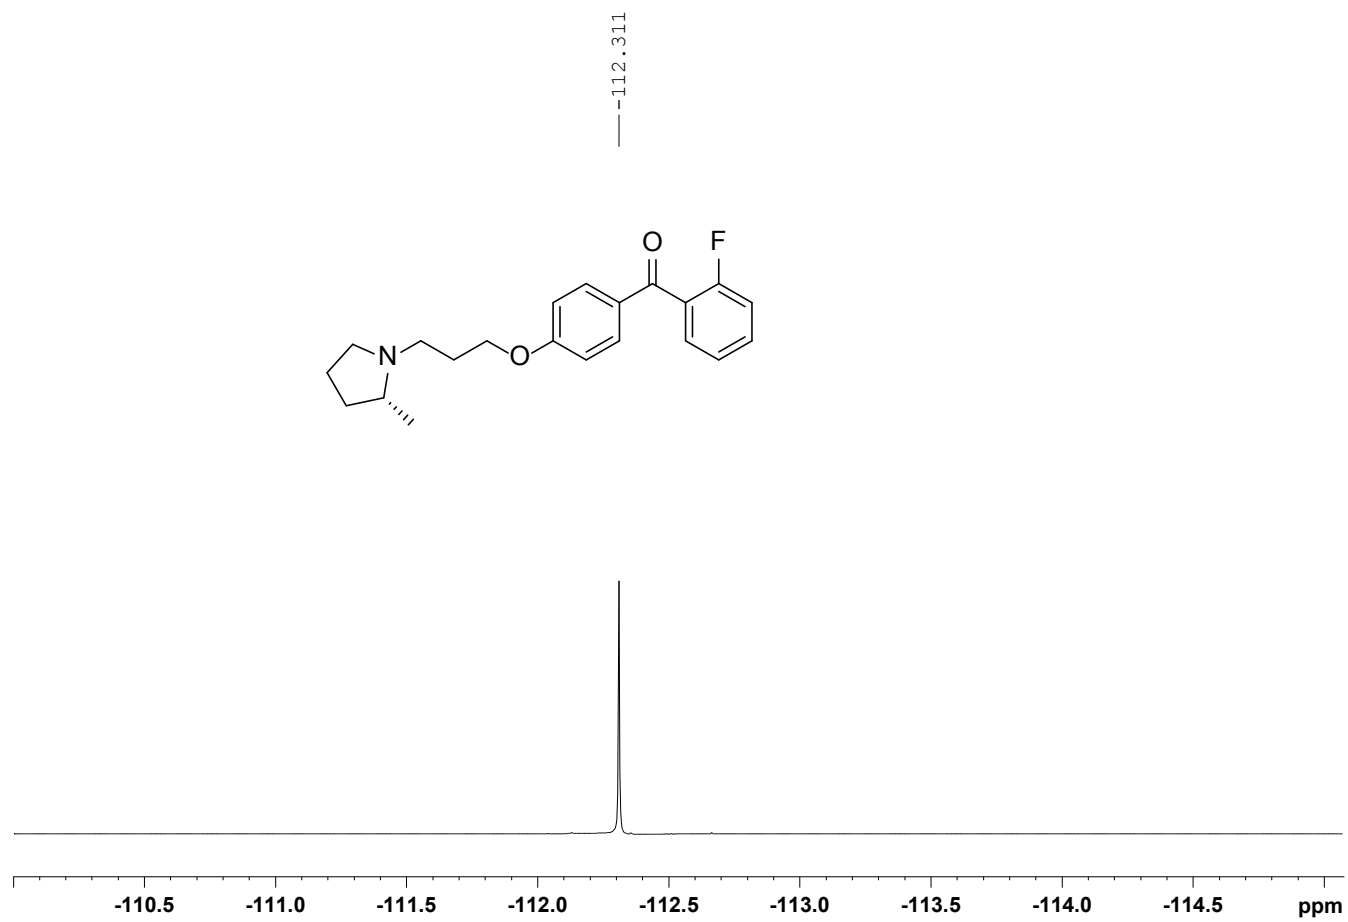

Figure 29.  $^{19}\text{F}$  NMR (470MHz,  $\text{CDCl}_3$ ) of **7a**

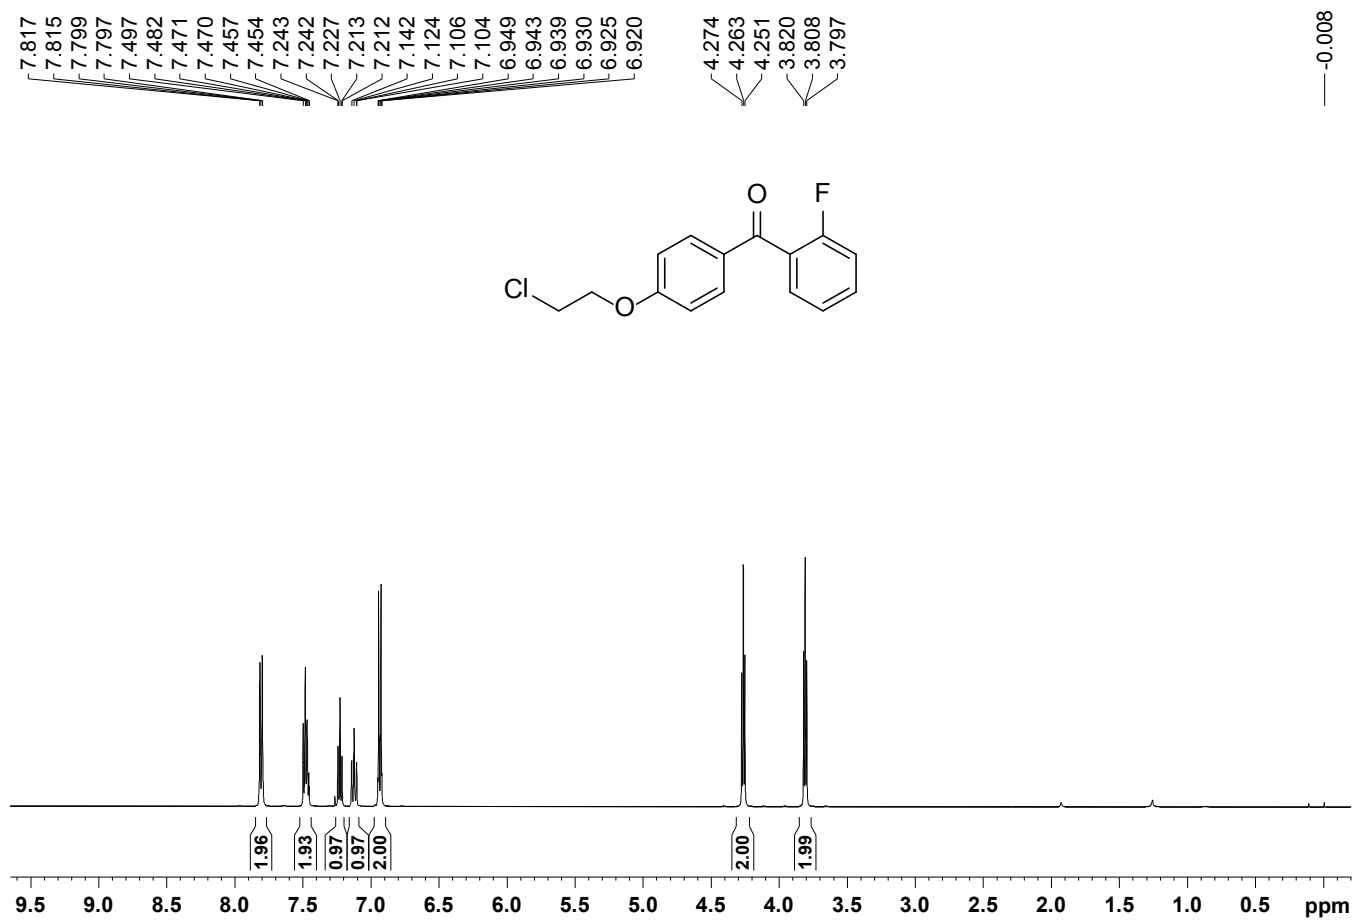

Figure 30. <sup>1</sup>H NMR (500MHz, CDCl<sub>3</sub>) of **6a'**

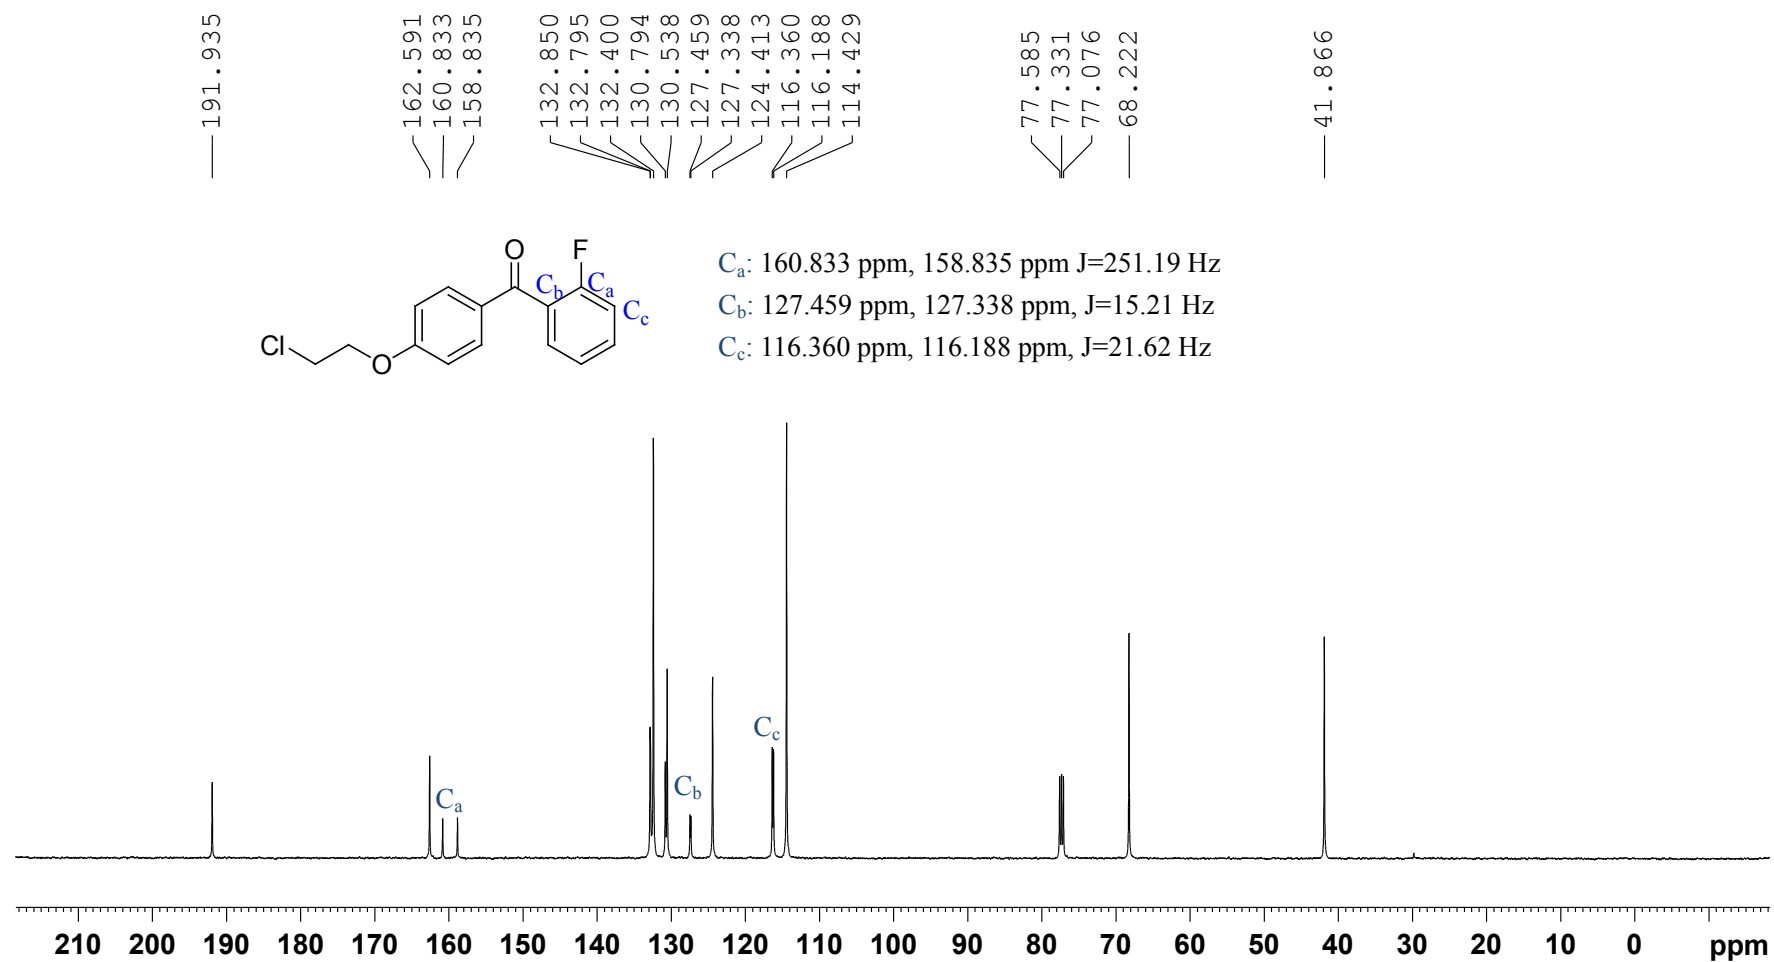

Figure 31. <sup>13</sup>C NMR (125MHz, CDCl<sub>3</sub>) of 6a'

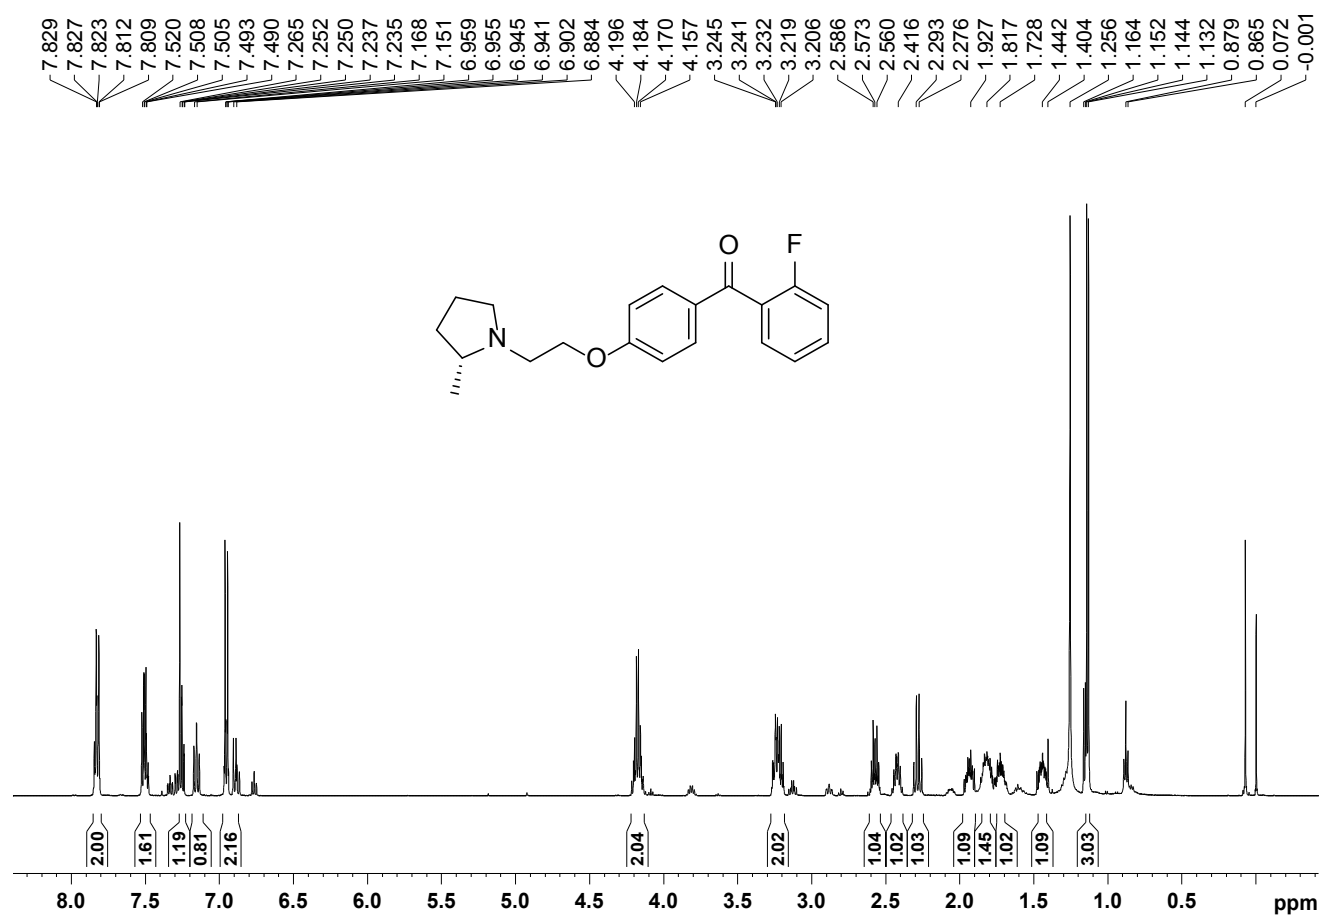

Figure 32. <sup>1</sup>H NMR (500MHz, CDCl<sub>3</sub>) of 7a'

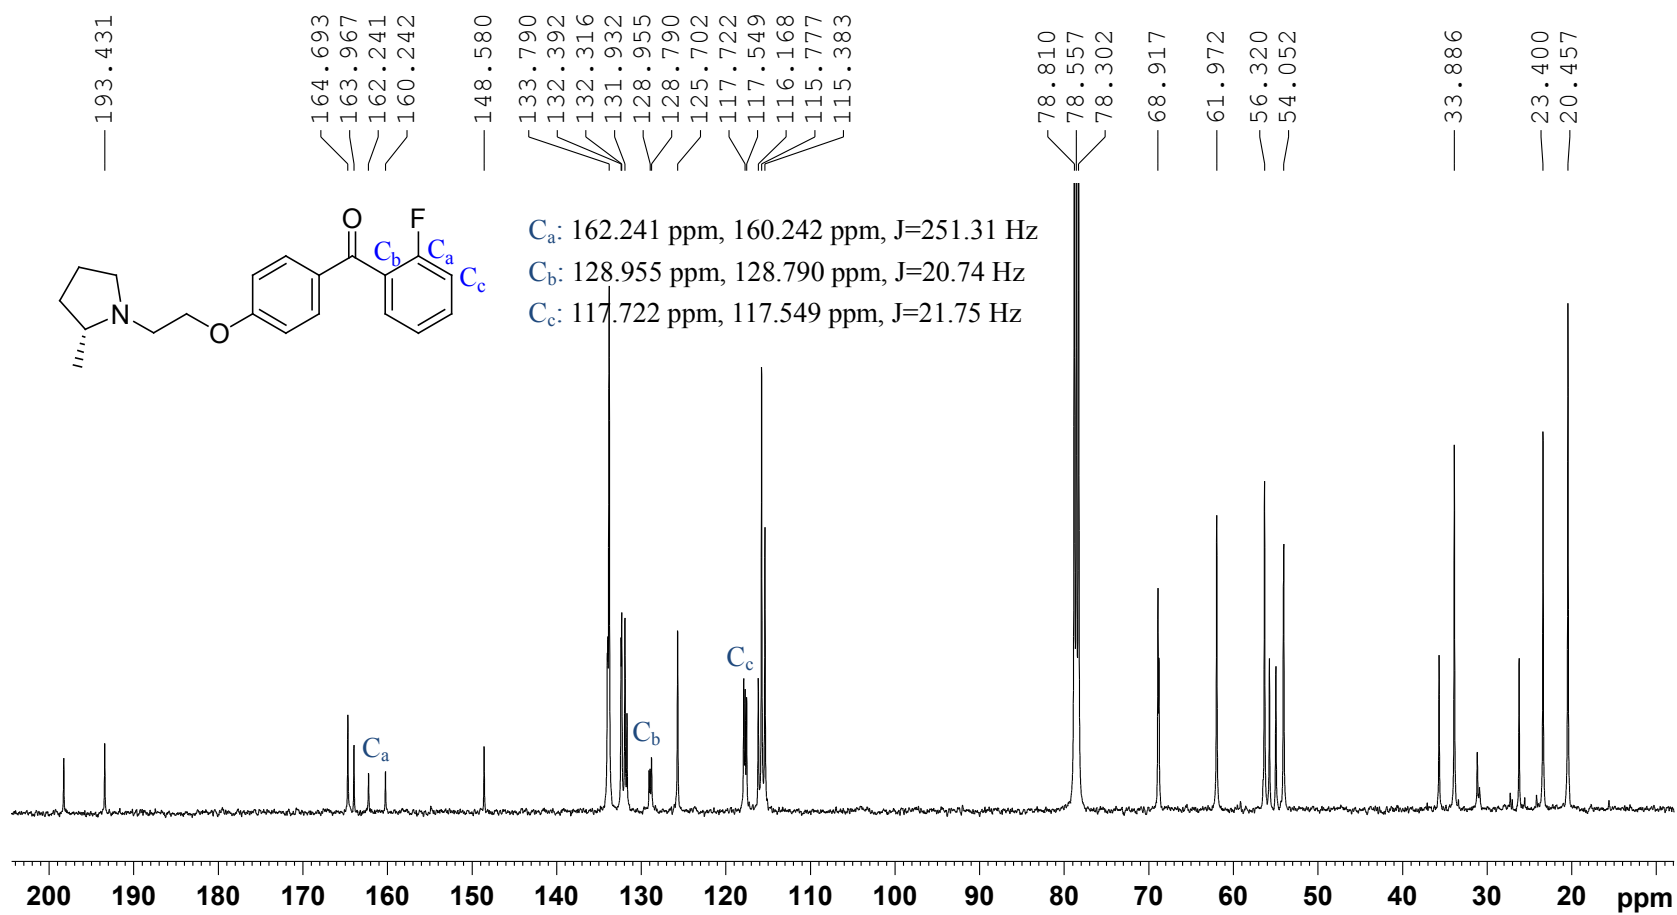

Figure 33.  $^{13}\text{C}$  NMR (125MHz,  $\text{CDCl}_3$ ) of 7a'

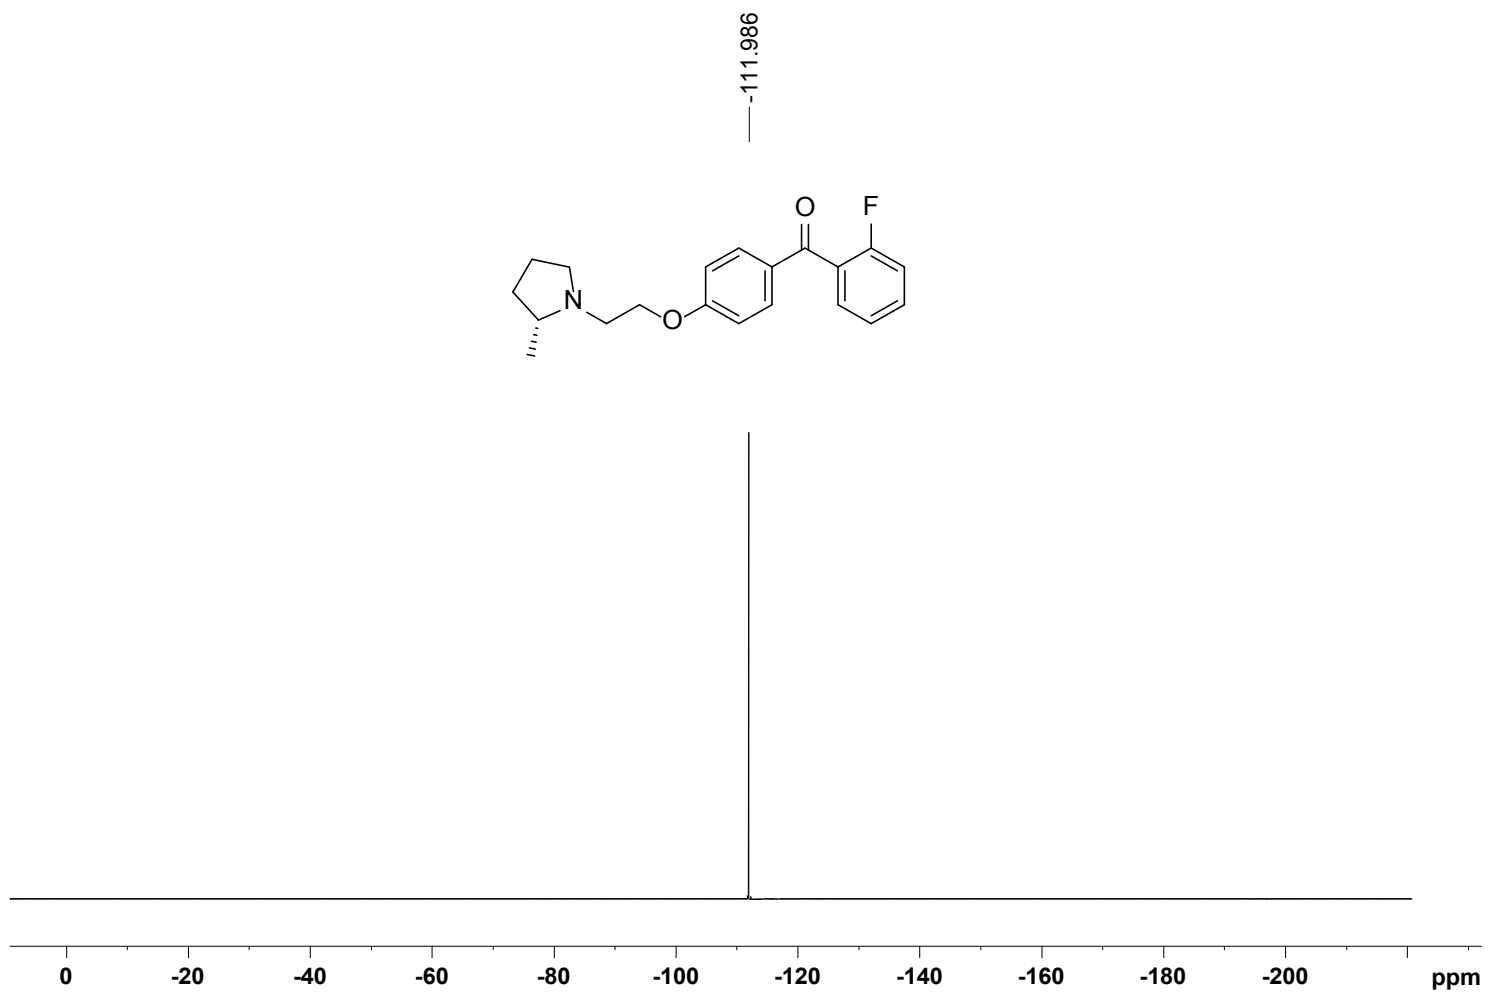

Figure 34.  $^{19}\text{F}$  NMR (470MHz,  $\text{CDCl}_3$ ) of **7a'**

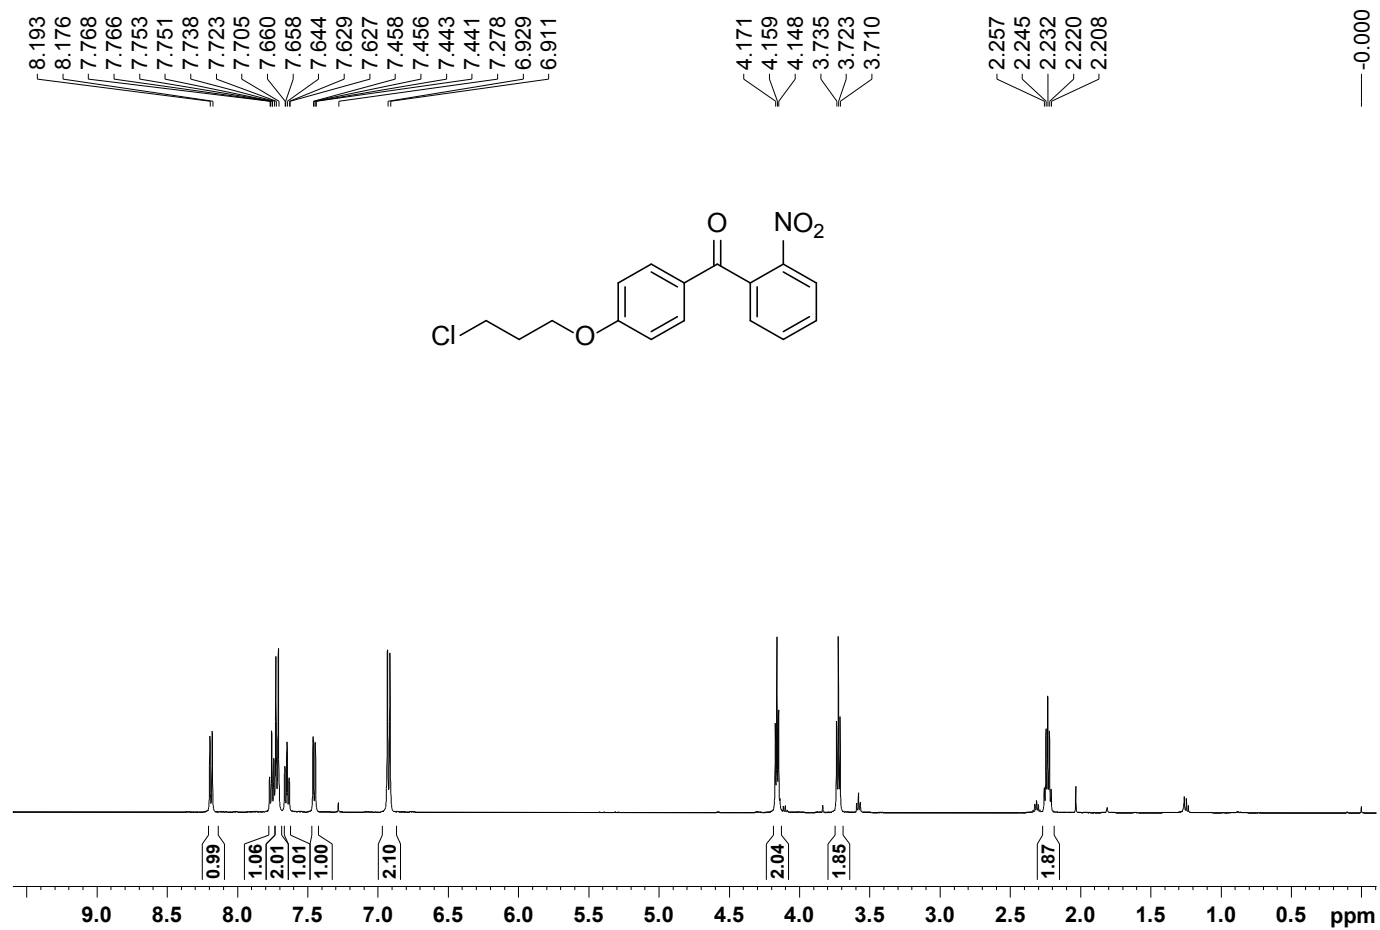

Figure 35. <sup>1</sup>H NMR (500MHz, CDCl<sub>3</sub>) of **6b**

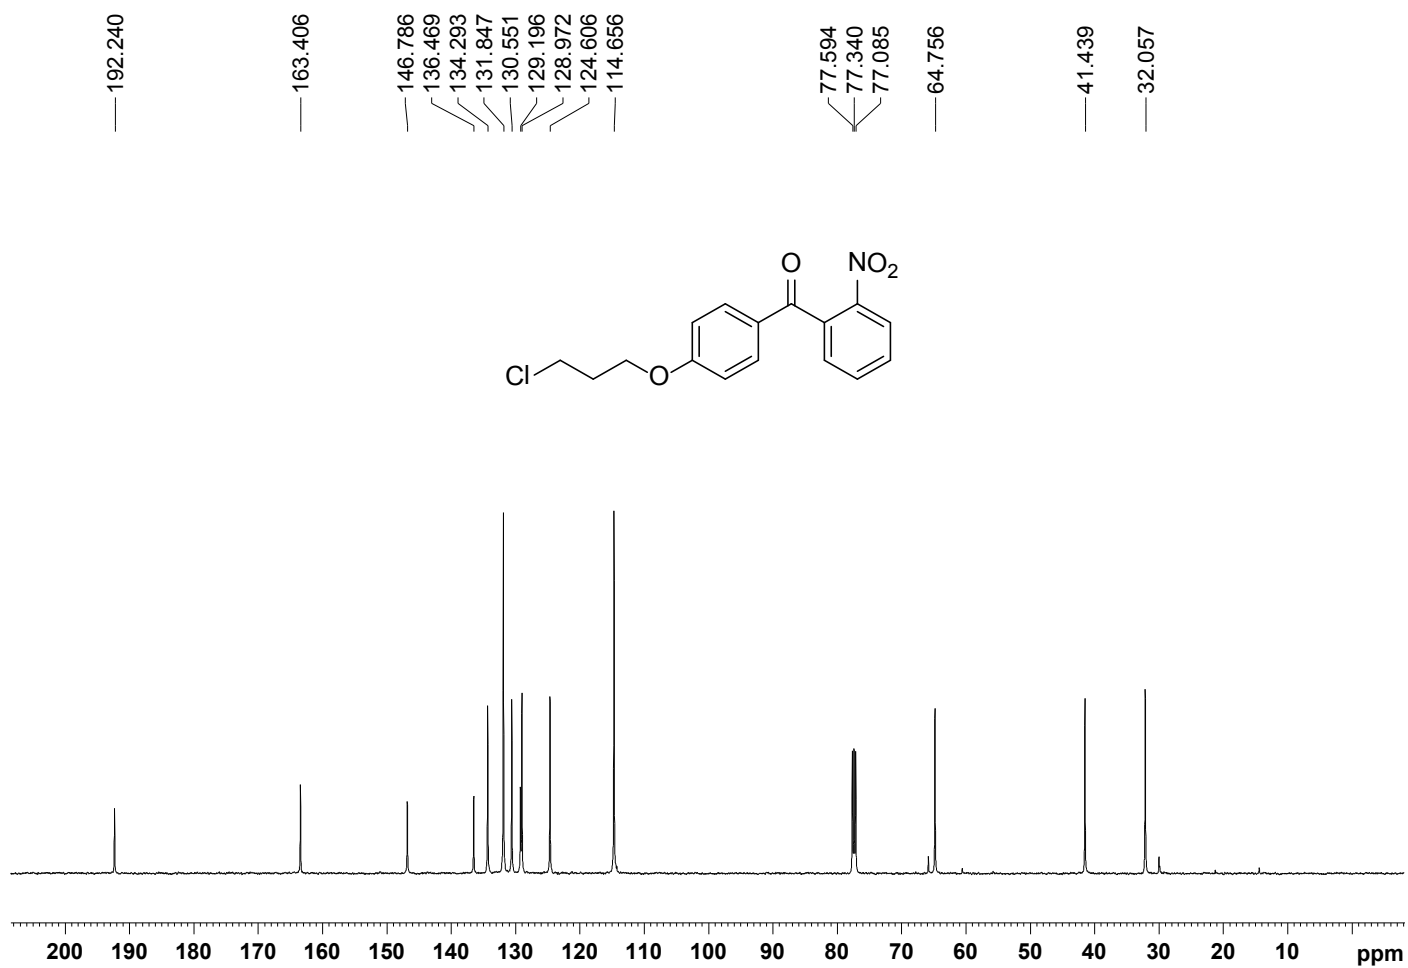

Figure 36.  $^{13}\text{C}$  NMR (125 MHz,  $\text{CDCl}_3$ ) of **6b**



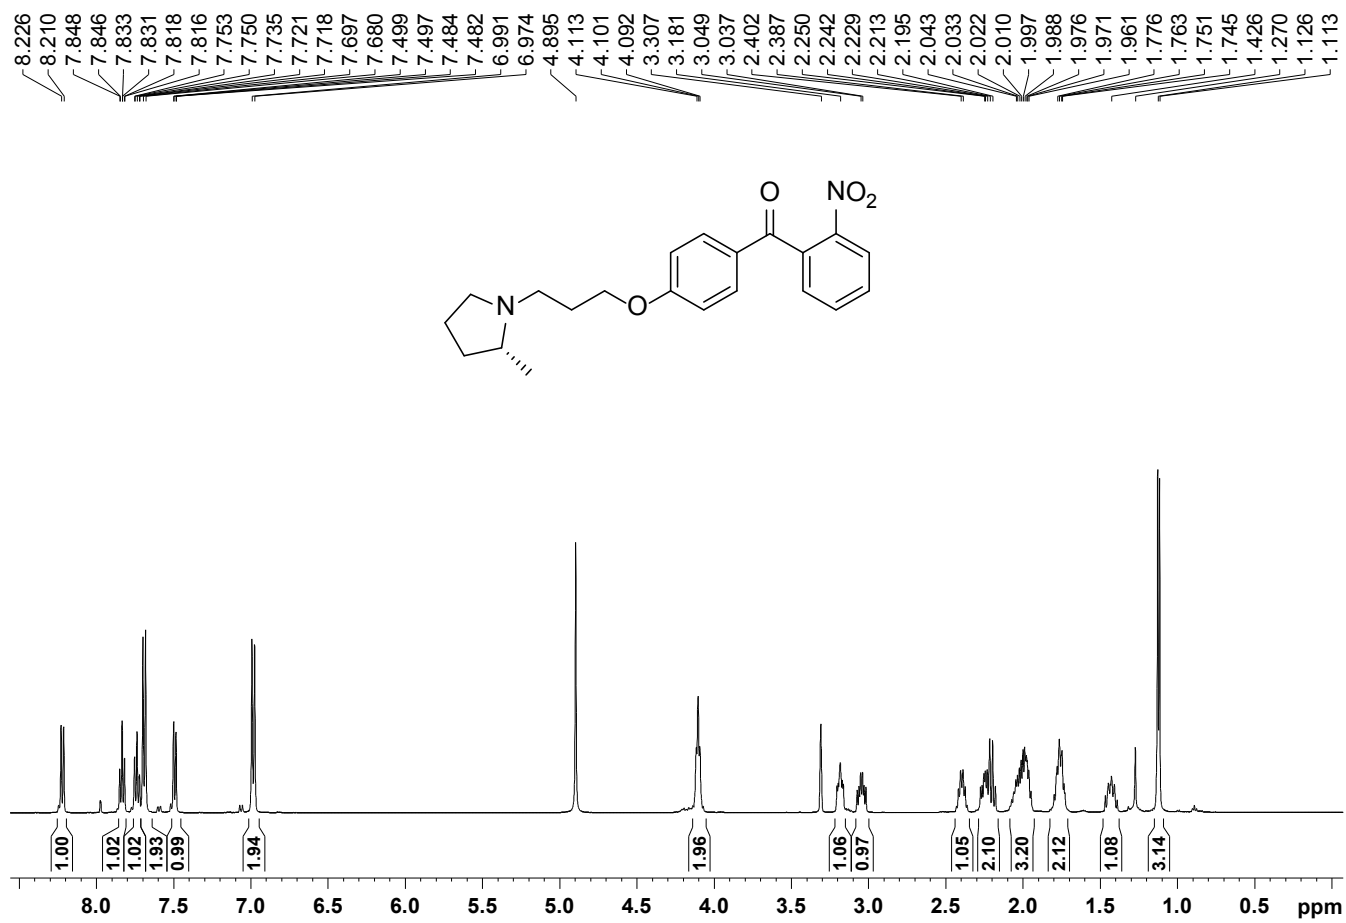

Figure 37. <sup>1</sup>H NMR (500MHz, CDCl<sub>3</sub>) of 7b

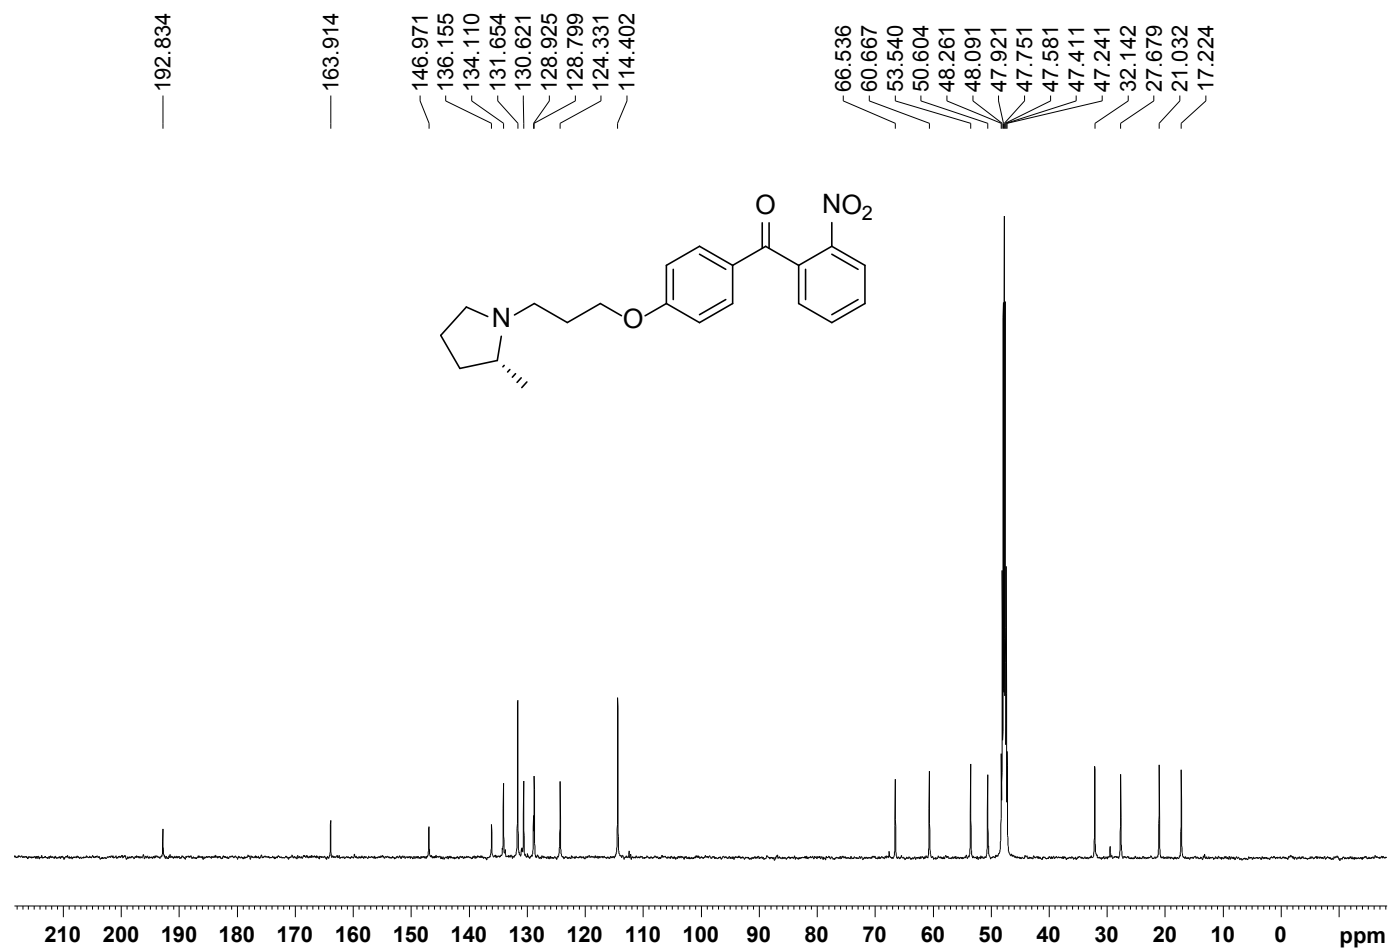

Figure 38.  $^{13}\text{C}$  NMR (125 MHz,  $\text{CD}_3\text{OD}$ ) of **7b**

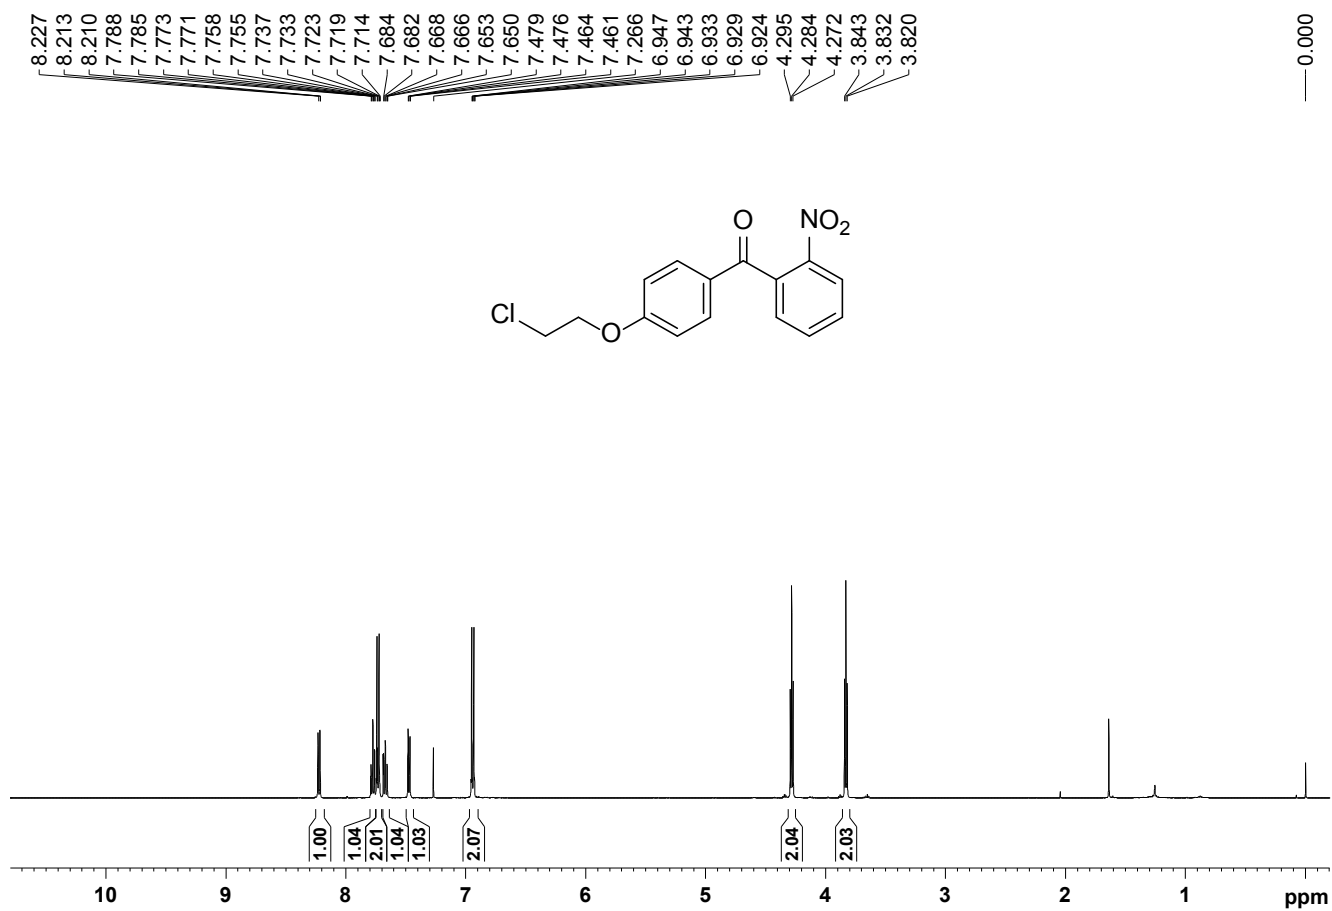

Figure 39. <sup>1</sup>H NMR (500MHz, CDCl<sub>3</sub>) of **6b'**

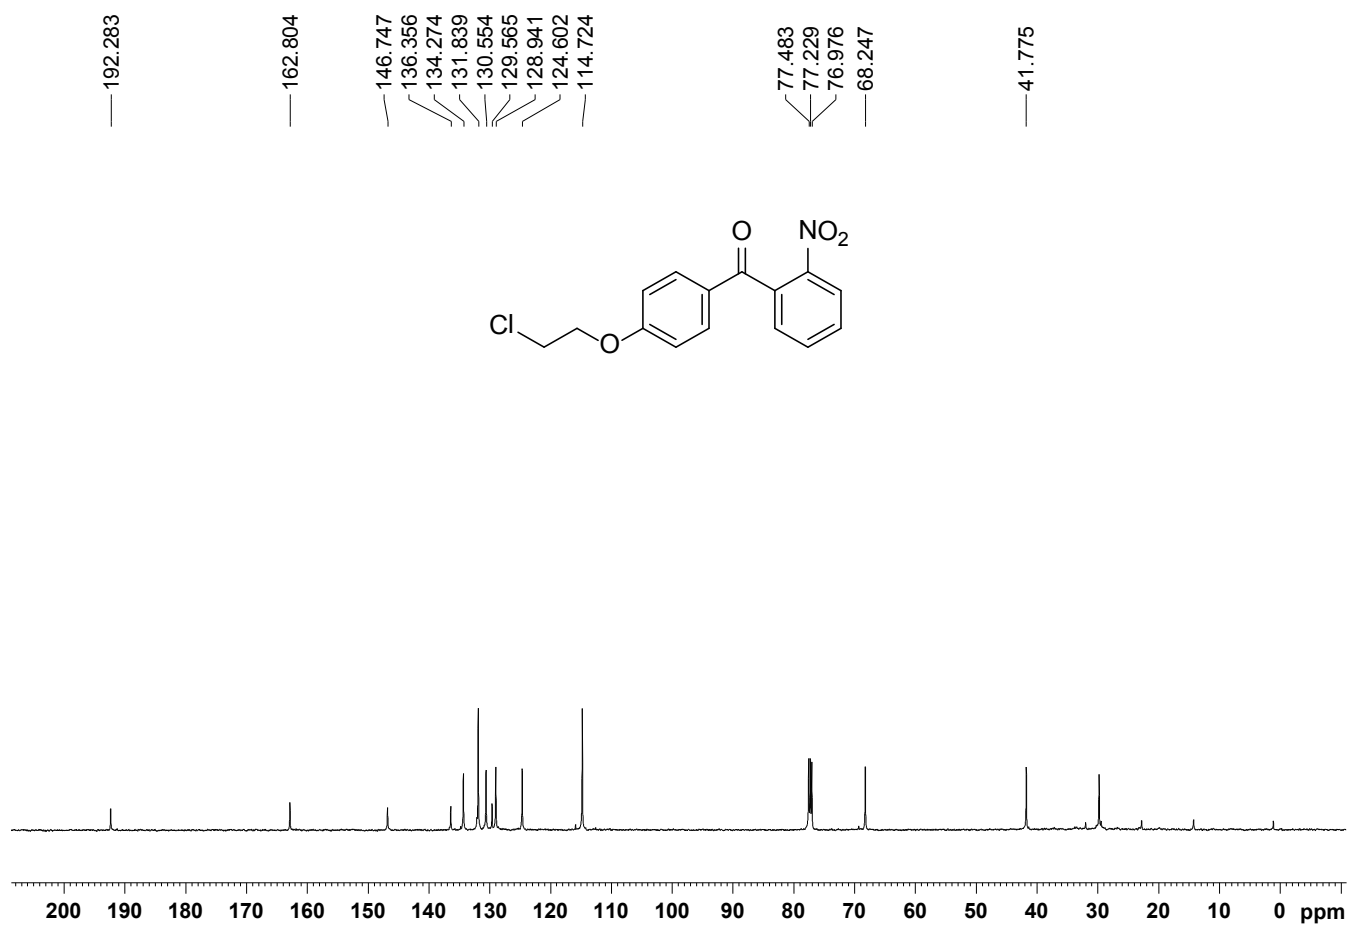

Figure 40.  $^{13}\text{C}$  NMR (125 MHz,  $\text{CDCl}_3$ ) of **6b'**

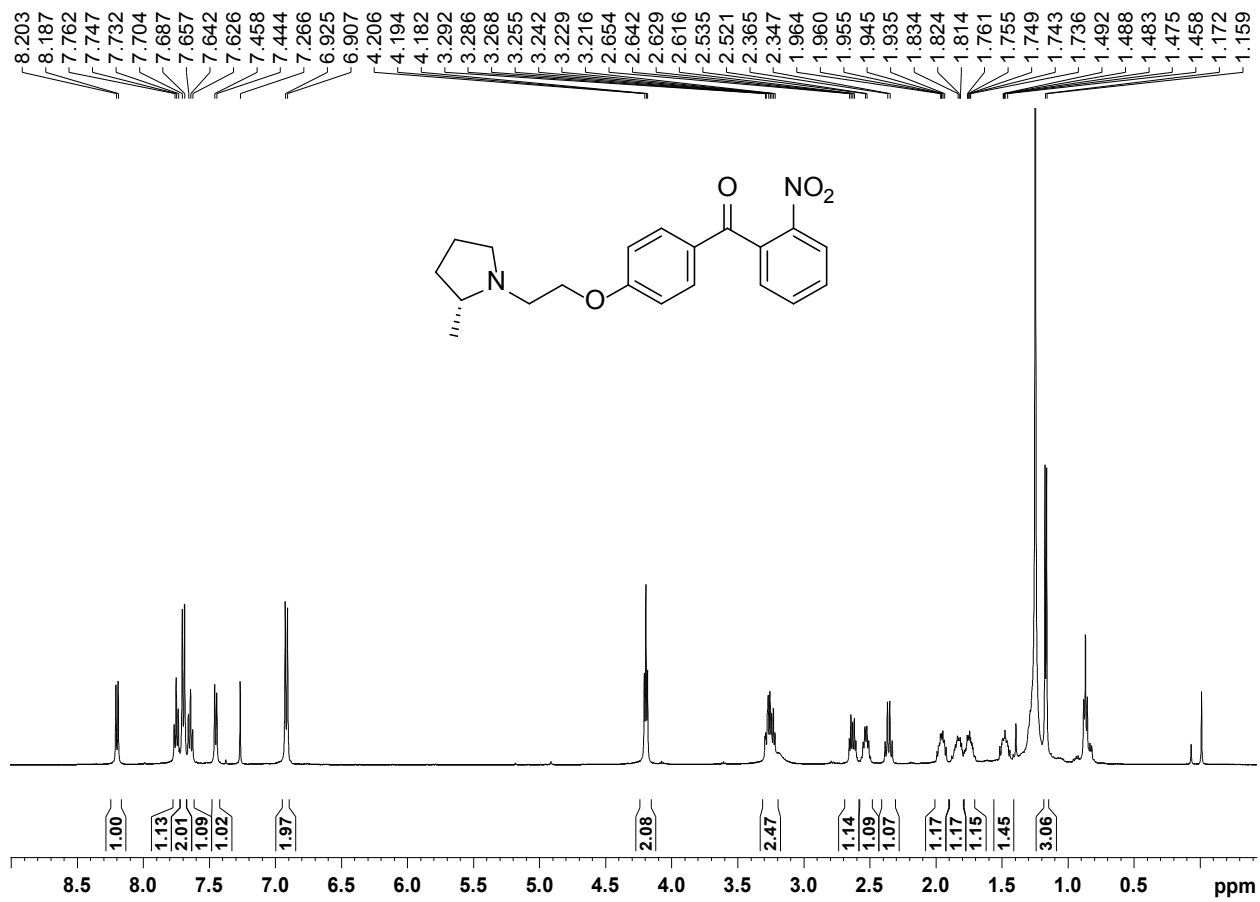

Figure 41. <sup>1</sup>H NMR (500MHz, CDCl<sub>3</sub>) of **7b'**

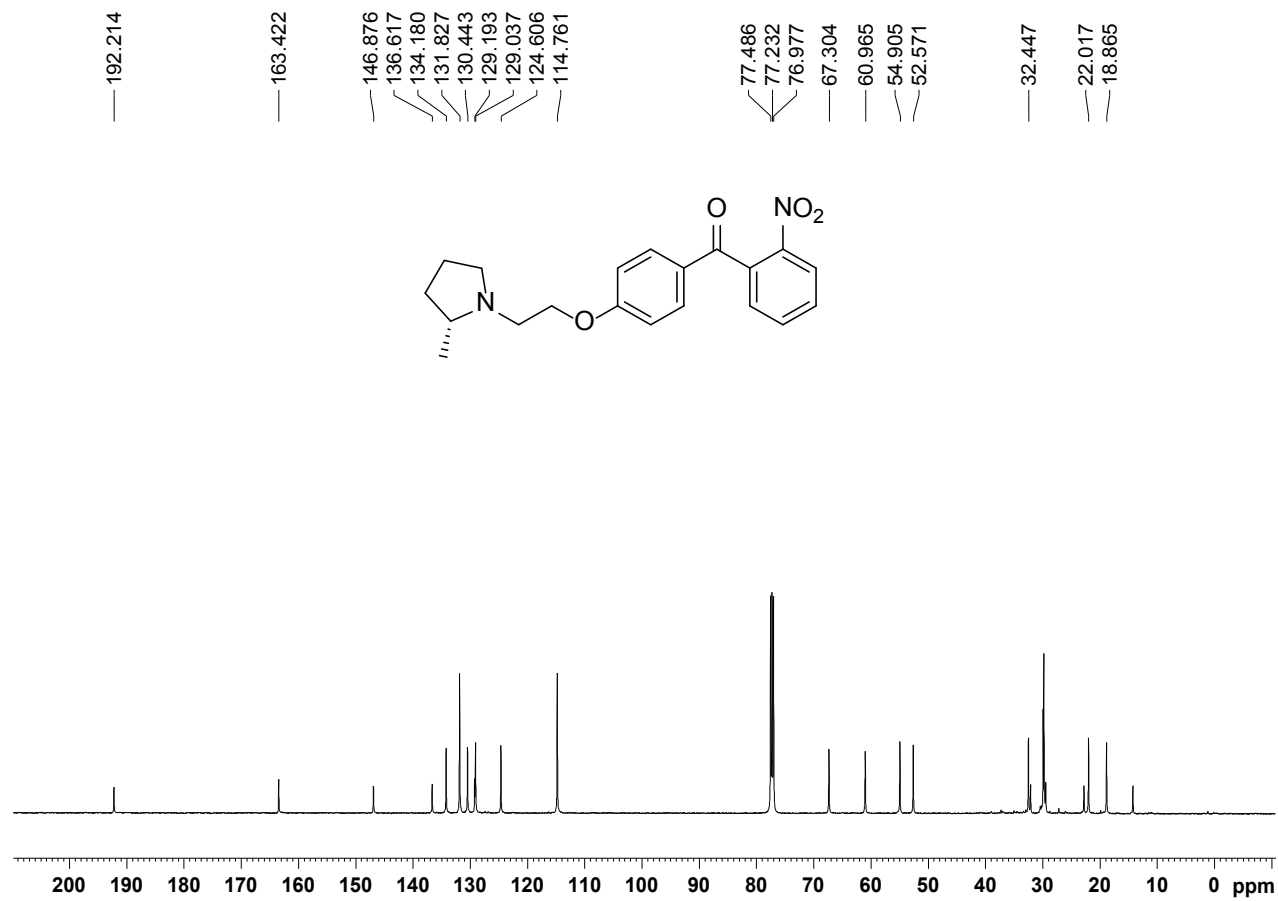

Figure 42. <sup>13</sup>C NMR (125MHz, CDCl<sub>3</sub>) of **7b'**

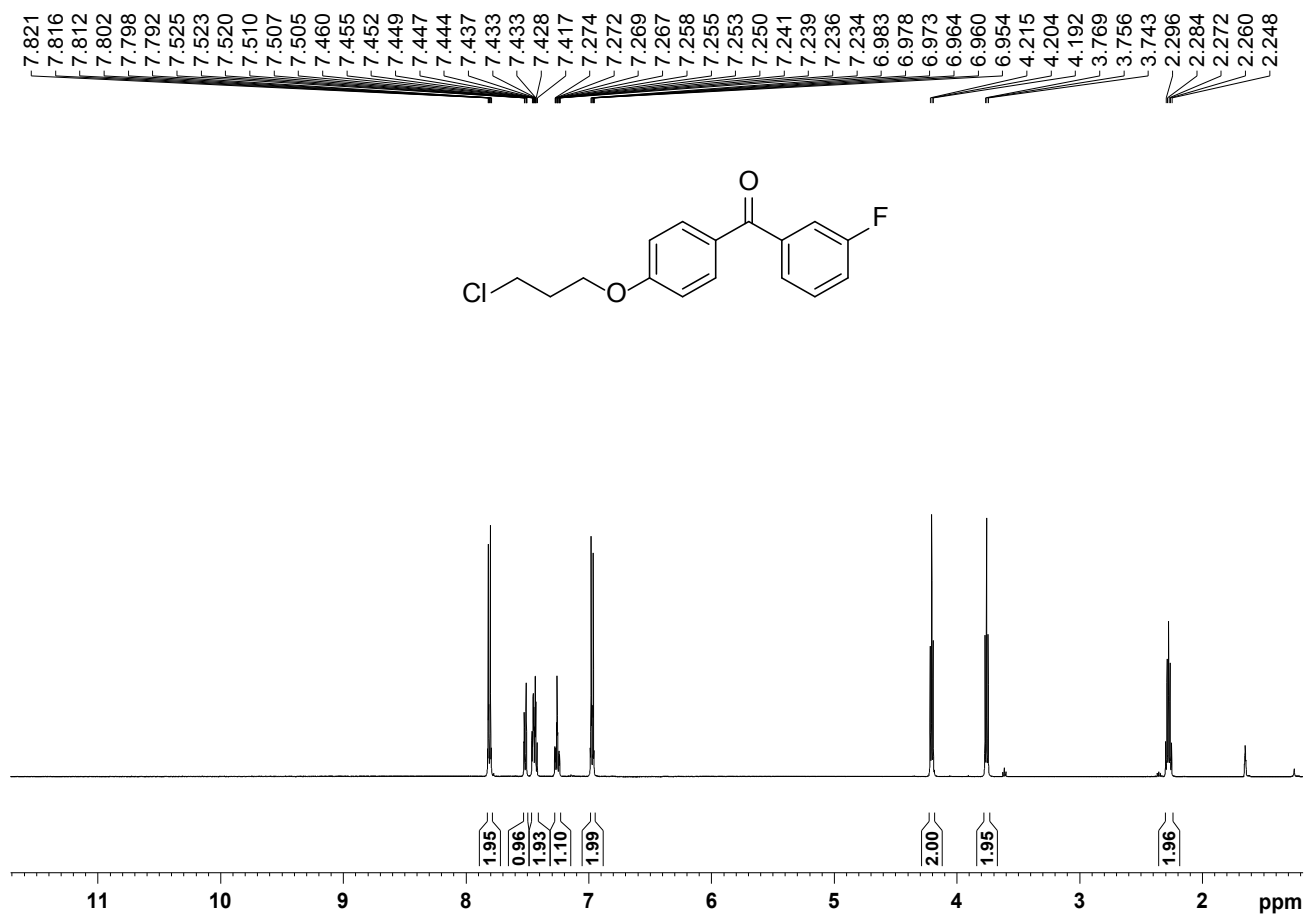

Figure 43. <sup>1</sup>H NMR (500MHz, CDCl<sub>3</sub>) of **6c**

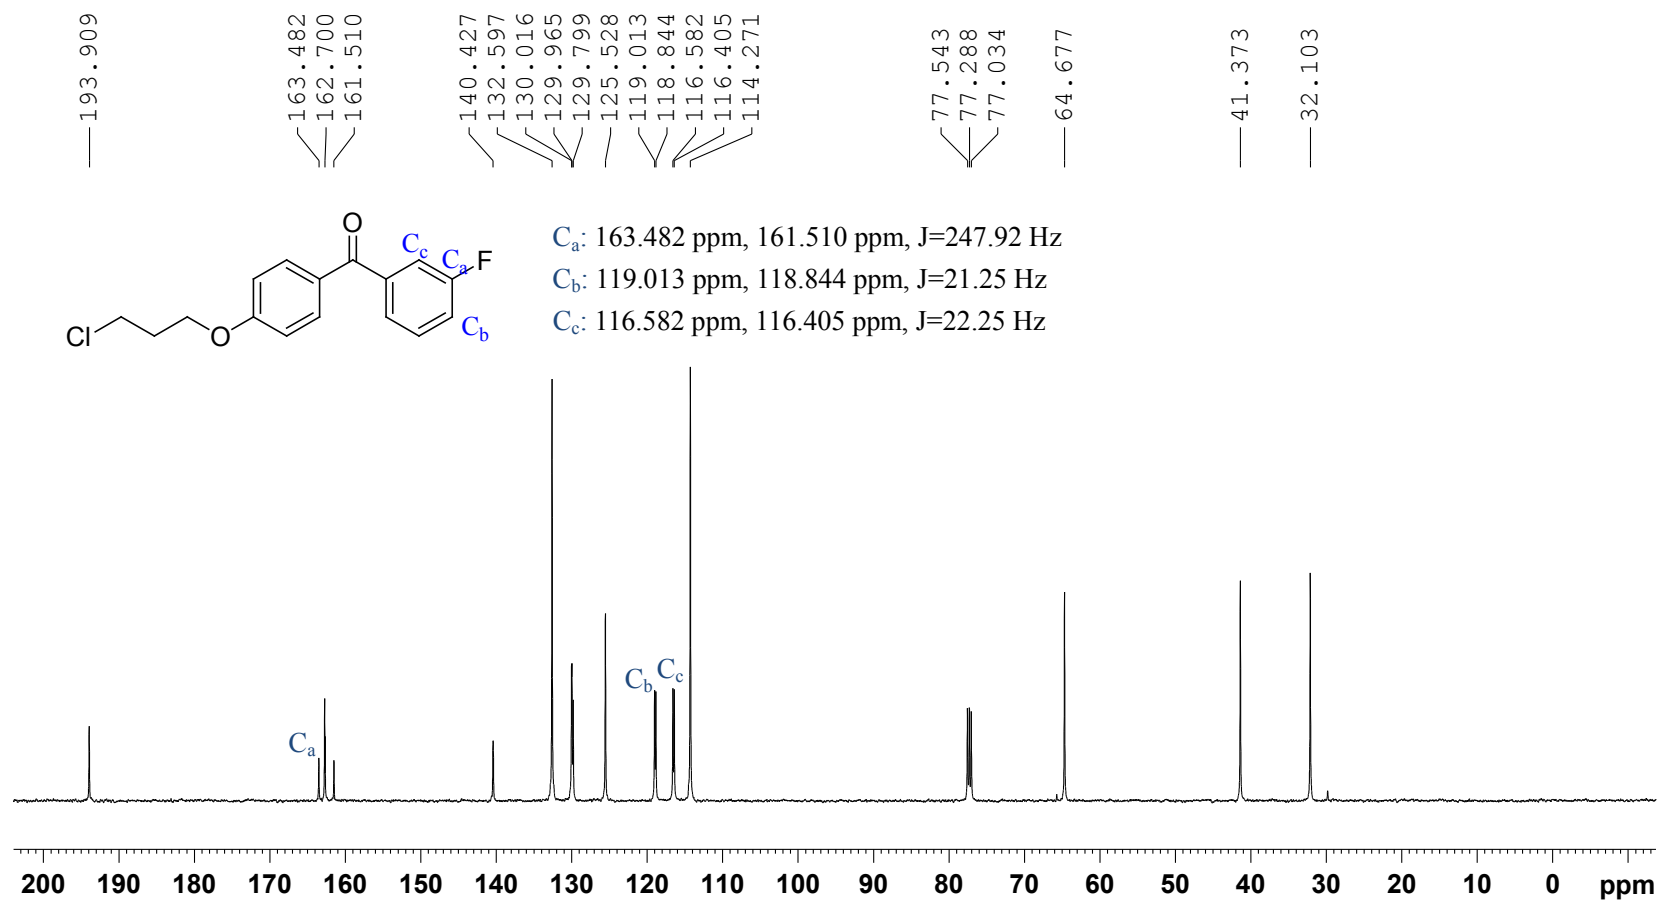

Figure 44.  $^{13}\text{C}$  NMR (125MHz,  $\text{CDCl}_3$ ) of **6c**



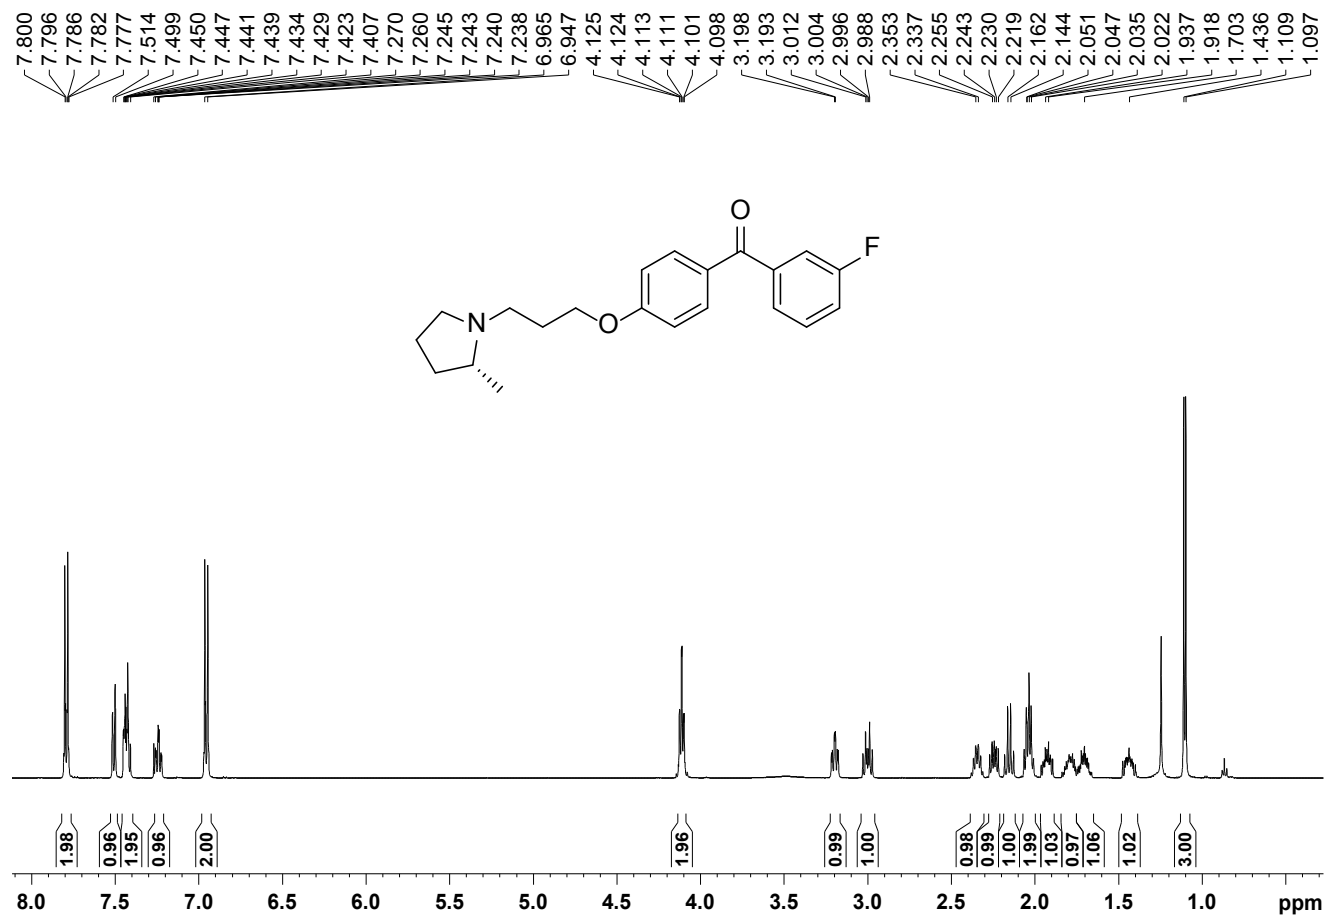

Figure 45. <sup>1</sup>H NMR (500MHz, CDCl<sub>3</sub>) of 7c

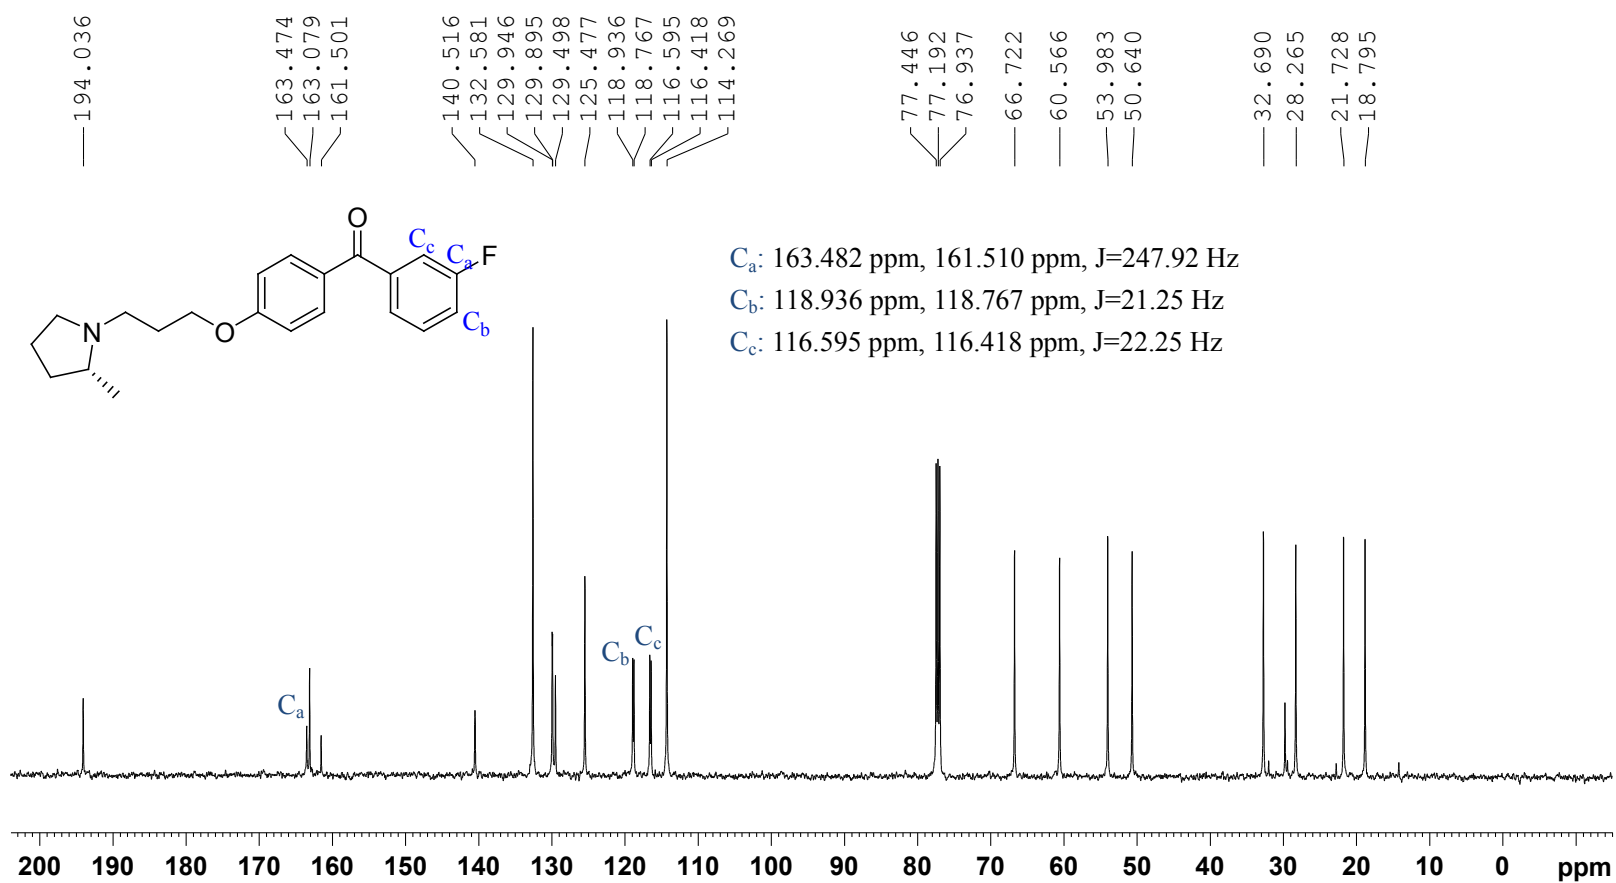

Figure 46.  $^{13}\text{C}$  NMR (125MHz,  $\text{CDCl}_3$ ) of 7c

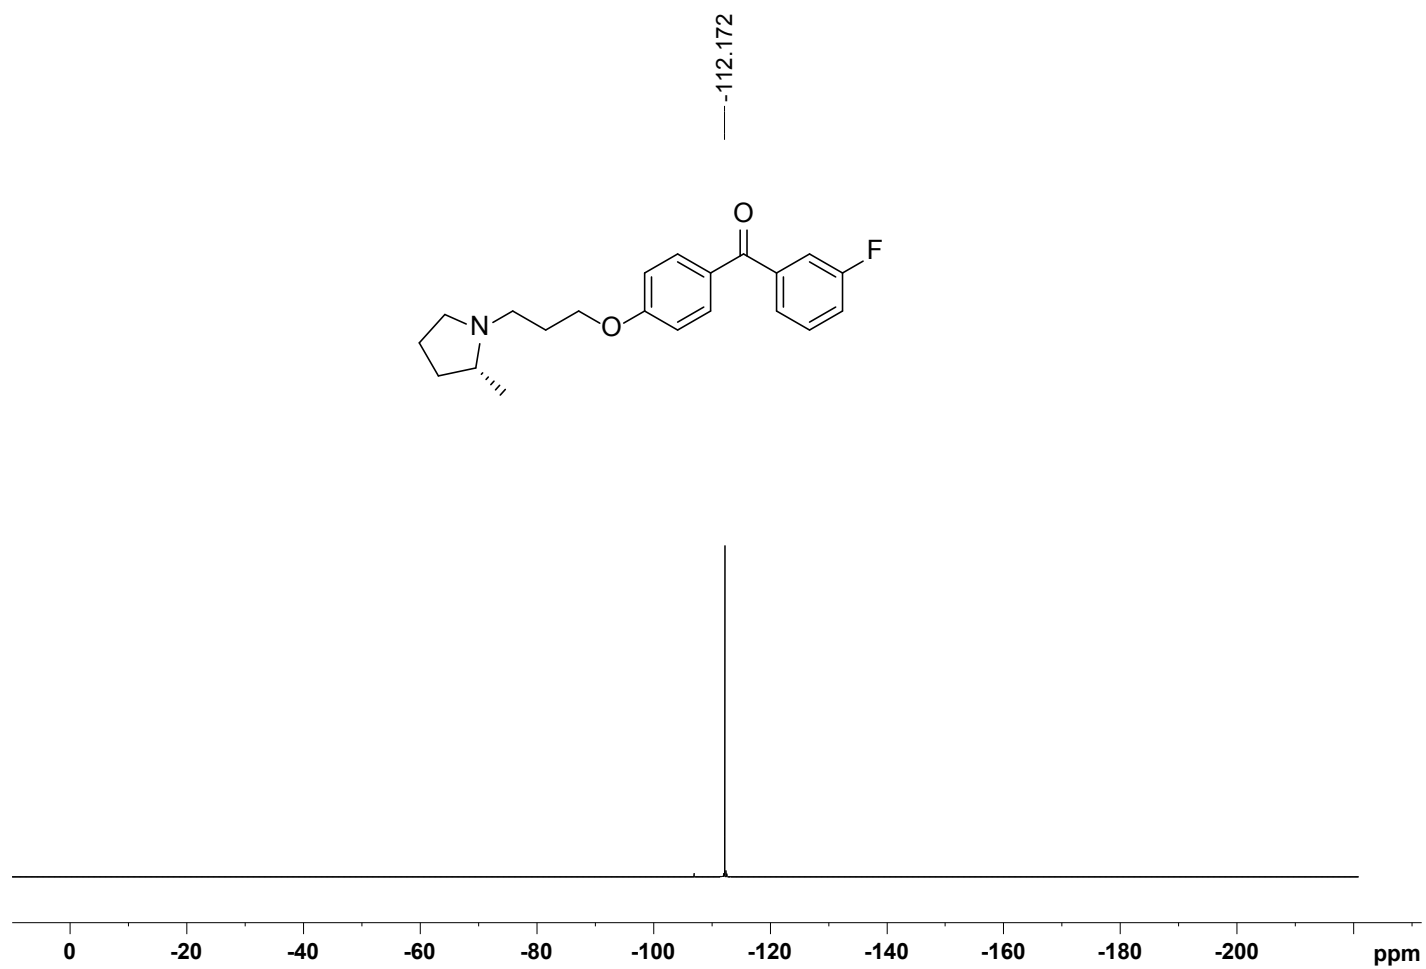

Figure 47.  $^{19}\text{F}$  NMR (470MHz,  $\text{CDCl}_3$ ) of 7c

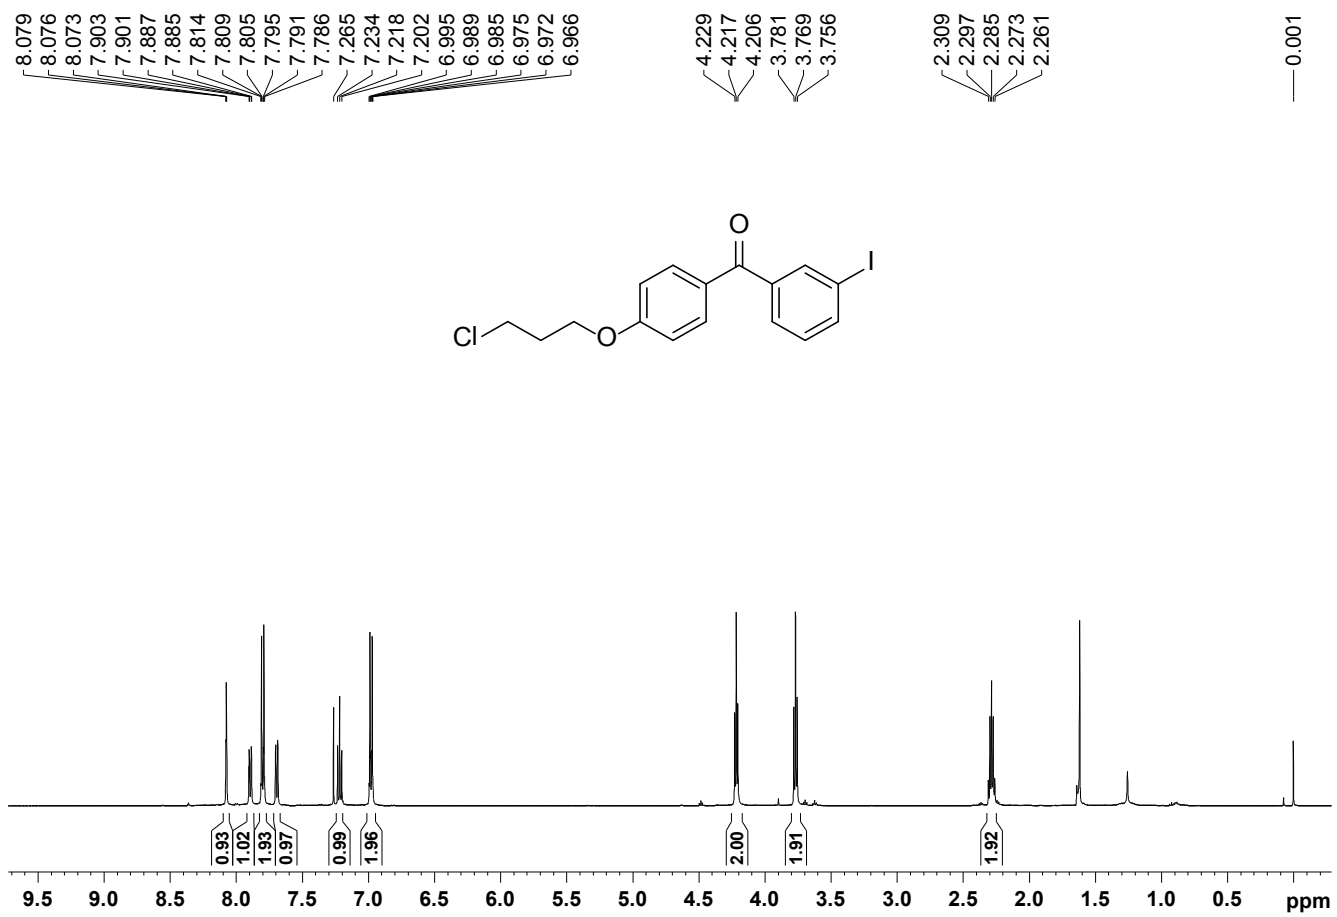

Figure 48. <sup>1</sup>H NMR (500MHz, CDCl<sub>3</sub>) of **6d**

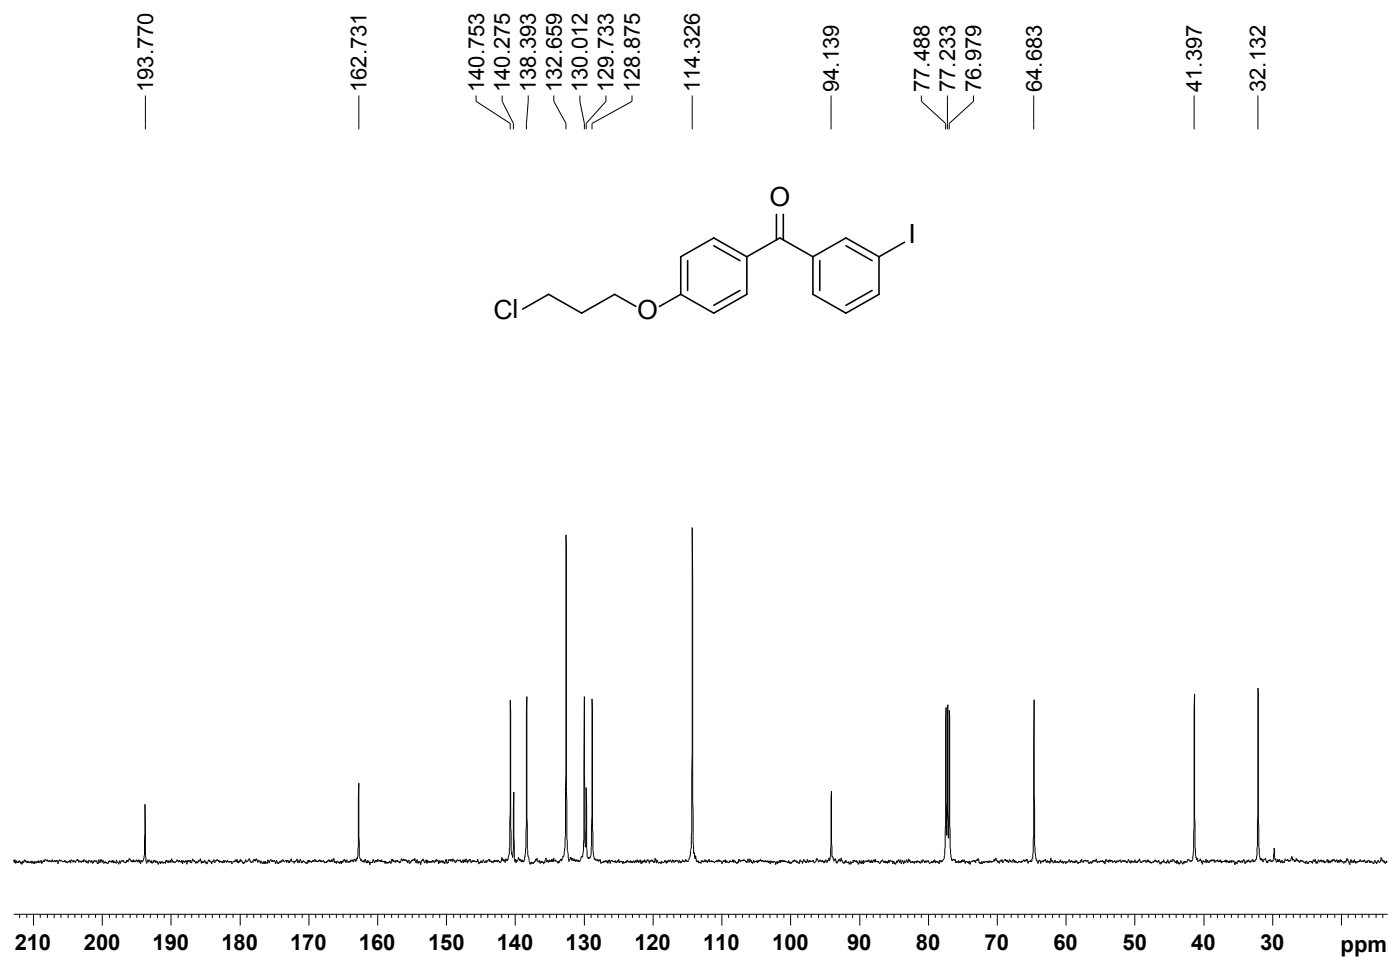

Figure 49.  $^{13}\text{C}$  NMR (125 MHz,  $\text{CDCl}_3$ ) of **6d**

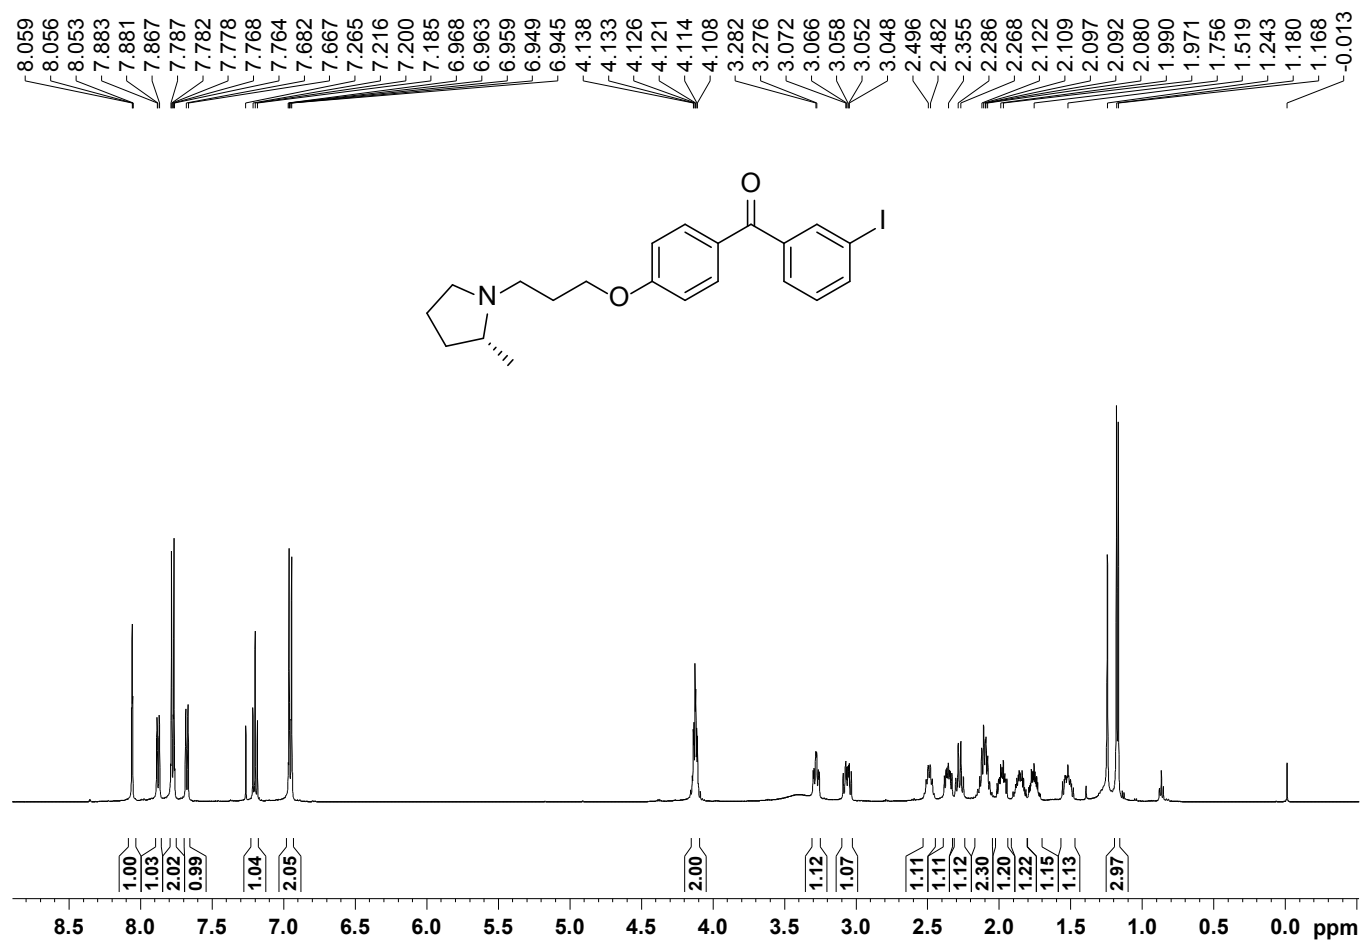

Figure 50. <sup>1</sup>H NMR (500MHz, CDCl<sub>3</sub>) of 7d

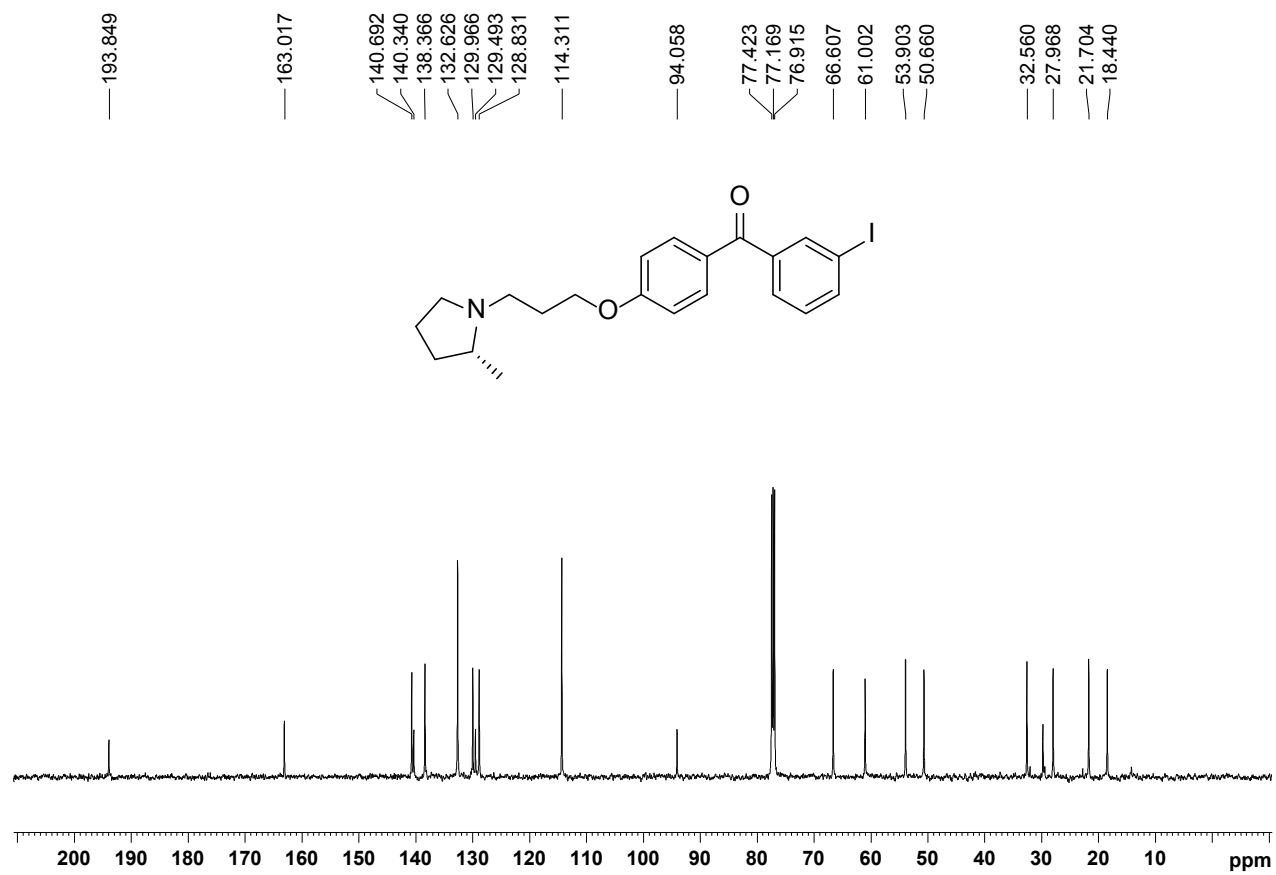

Figure 51.  $^{13}\text{C}$  NMR (125 MHz,  $\text{CDCl}_3$ ) of **7d**

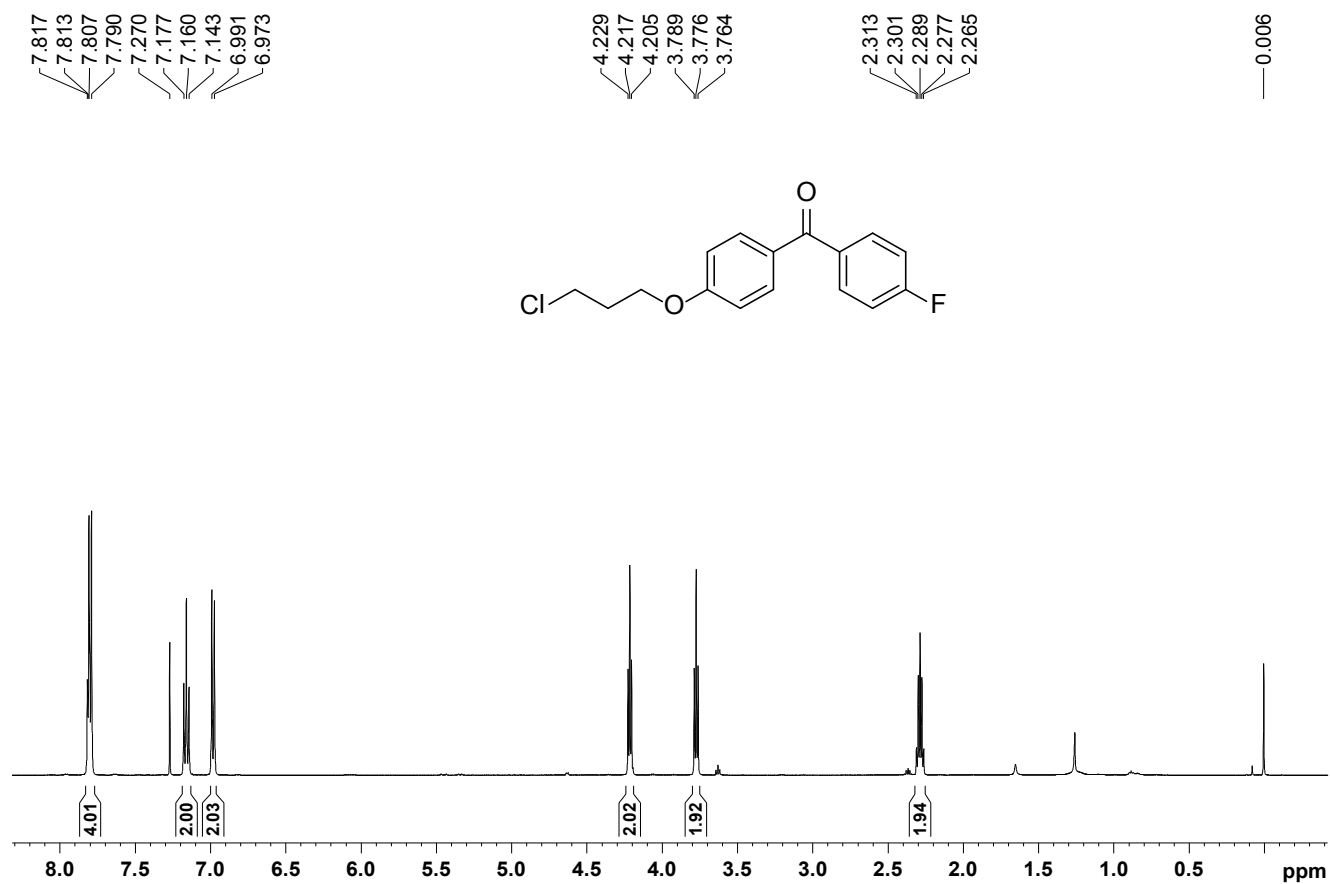

Figure 52. <sup>1</sup>H NMR (500MHz, CDCl<sub>3</sub>) of **6e**



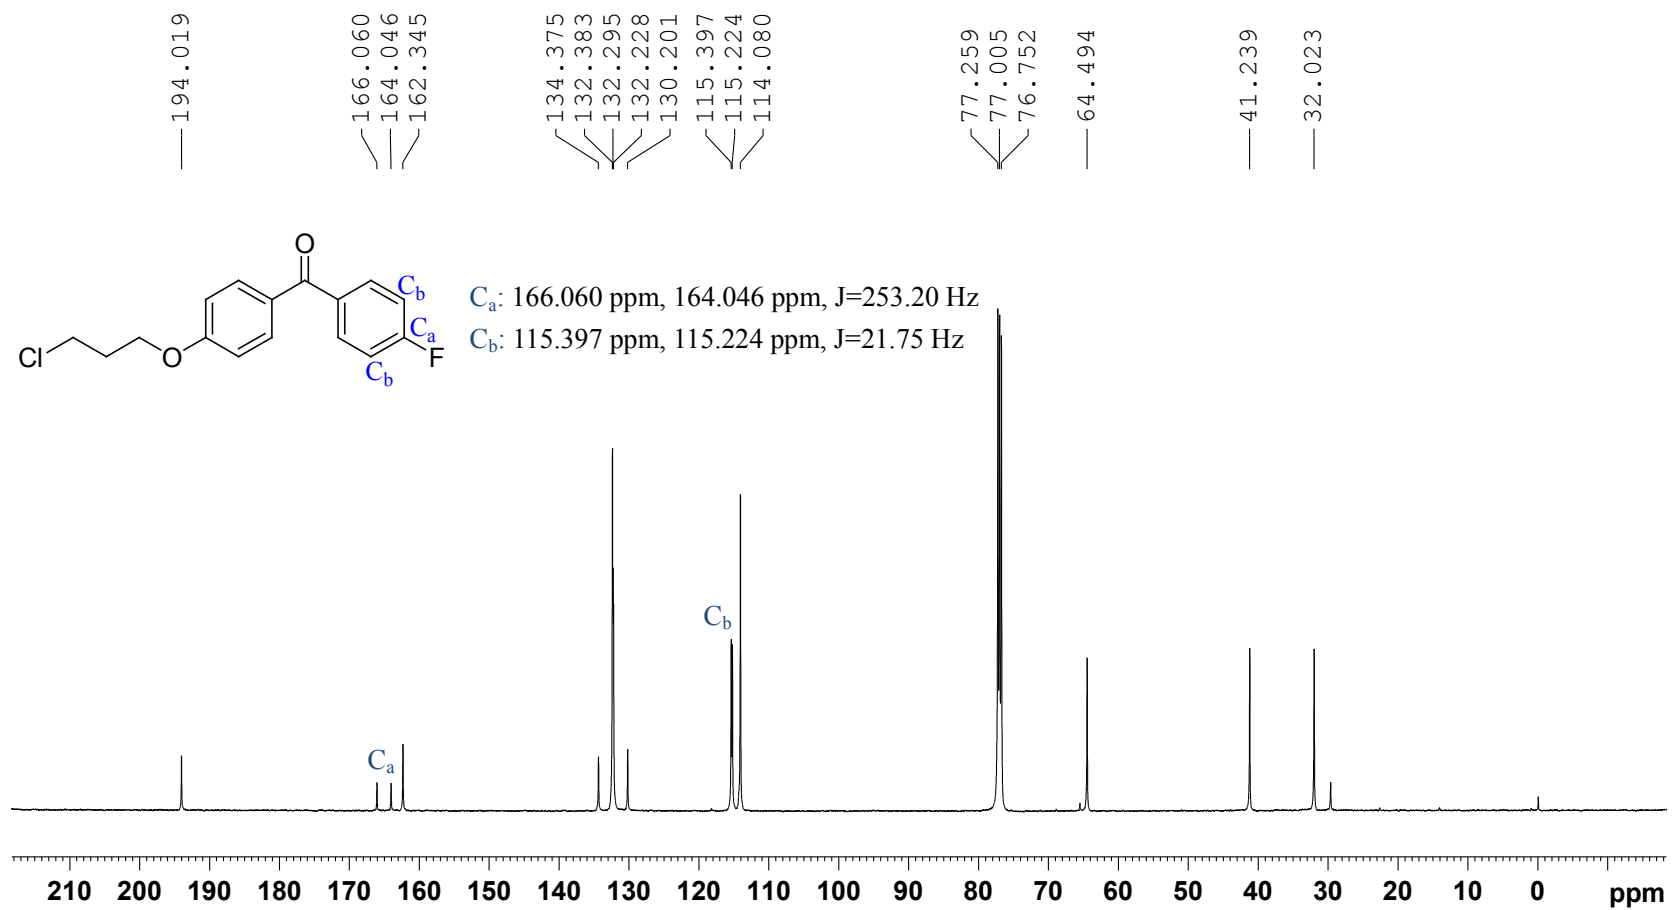

Figure 53.  $^{13}\text{C}$  NMR (125MHz,  $\text{CDCl}_3$ ) of **6e**

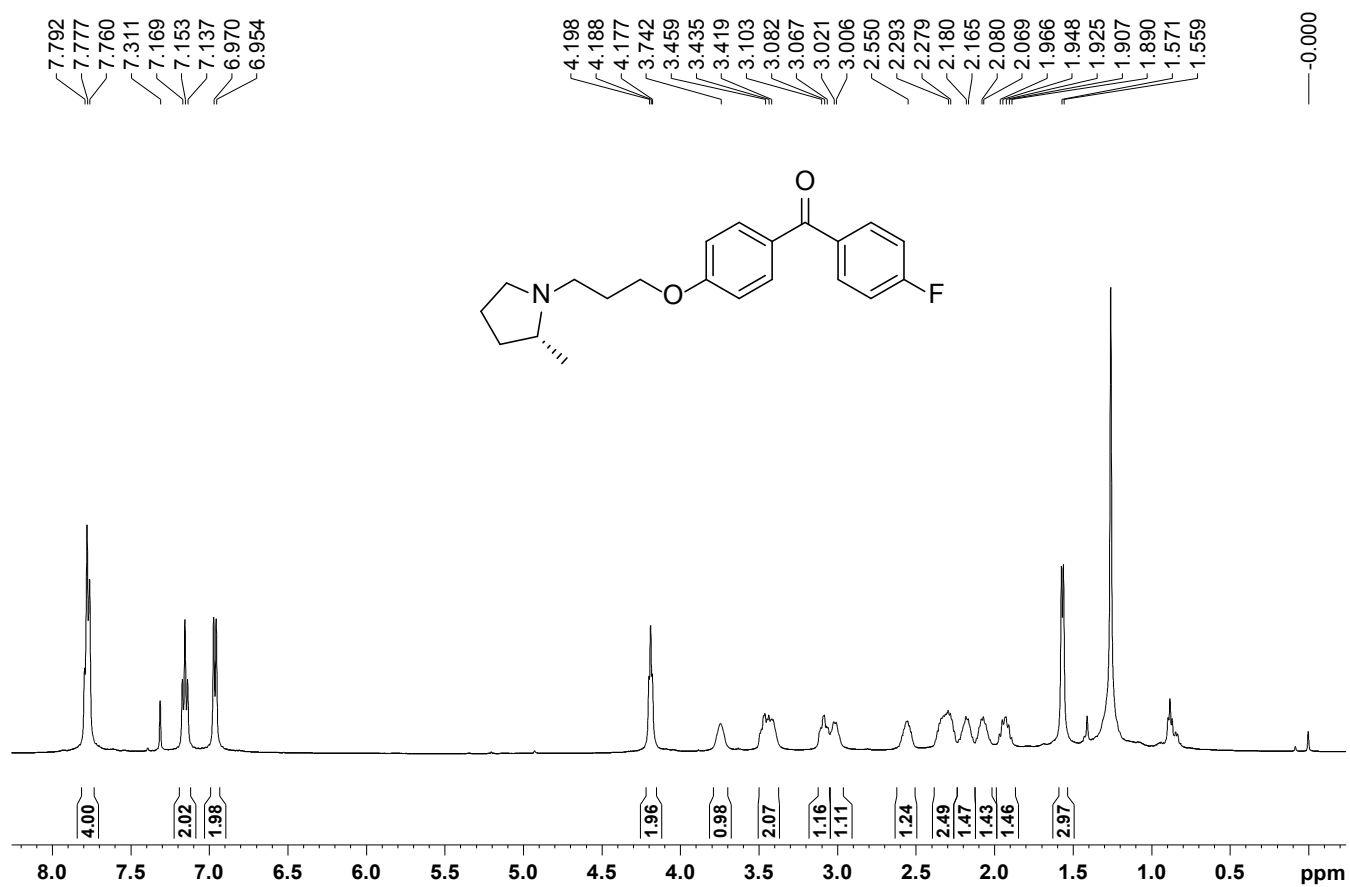

Figure 54. <sup>1</sup>H NMR (500MHz, CDCl<sub>3</sub>) of 7e

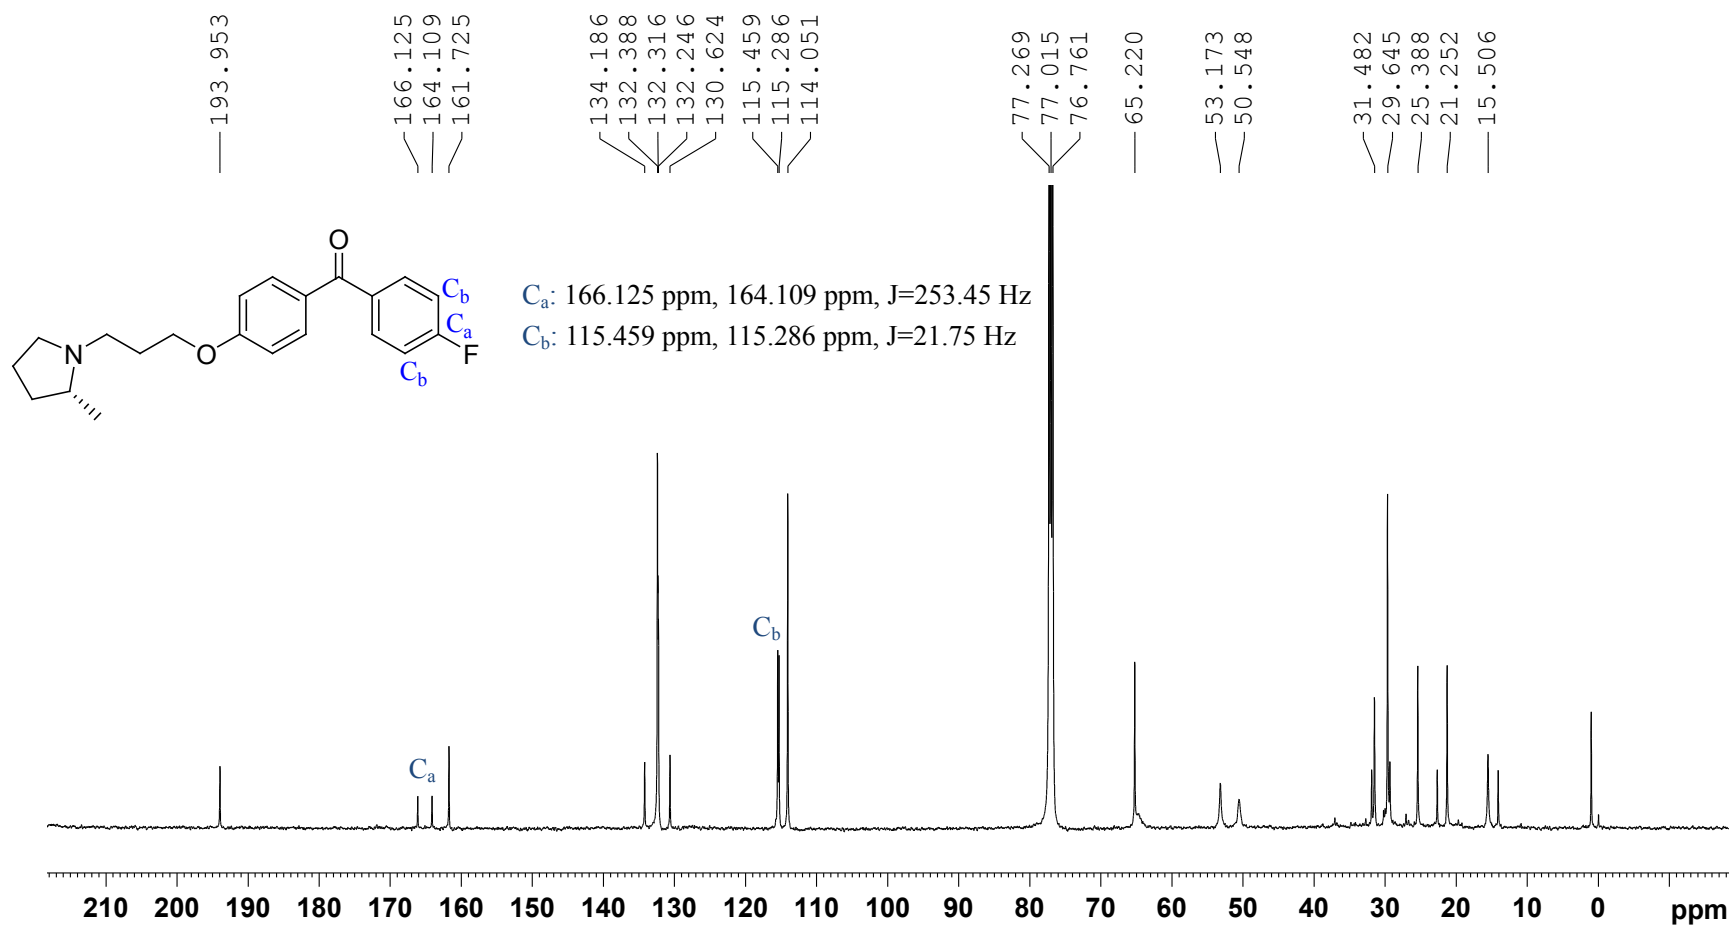

Figure 55.  $^{13}\text{C}$  NMR (125MHz,  $\text{CDCl}_3$ ) of 7e

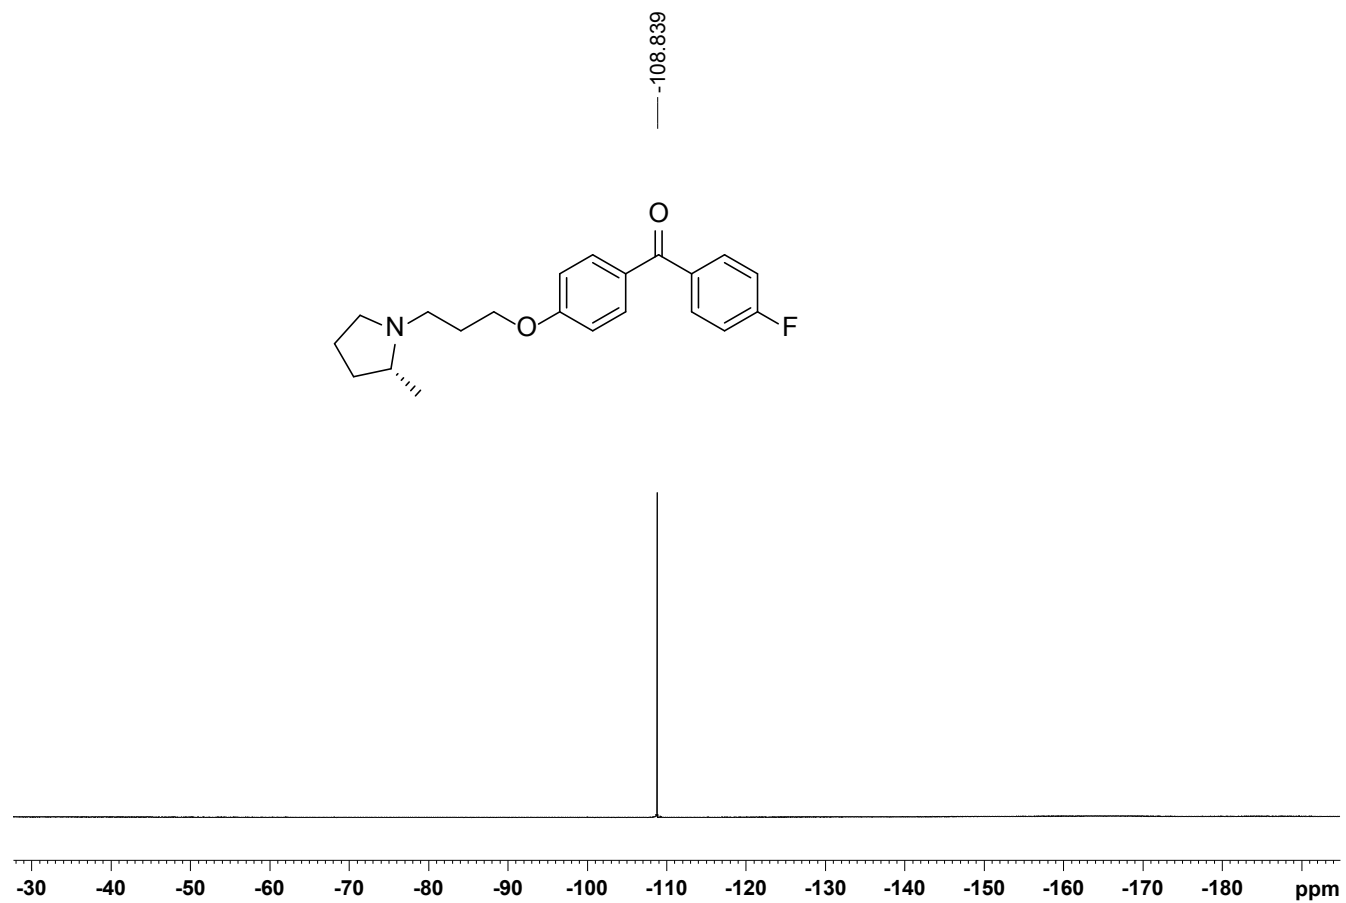

Figure S6.  $^{19}\text{F}$  NMR (470MHz,  $\text{CDCl}_3$ ) of 7e

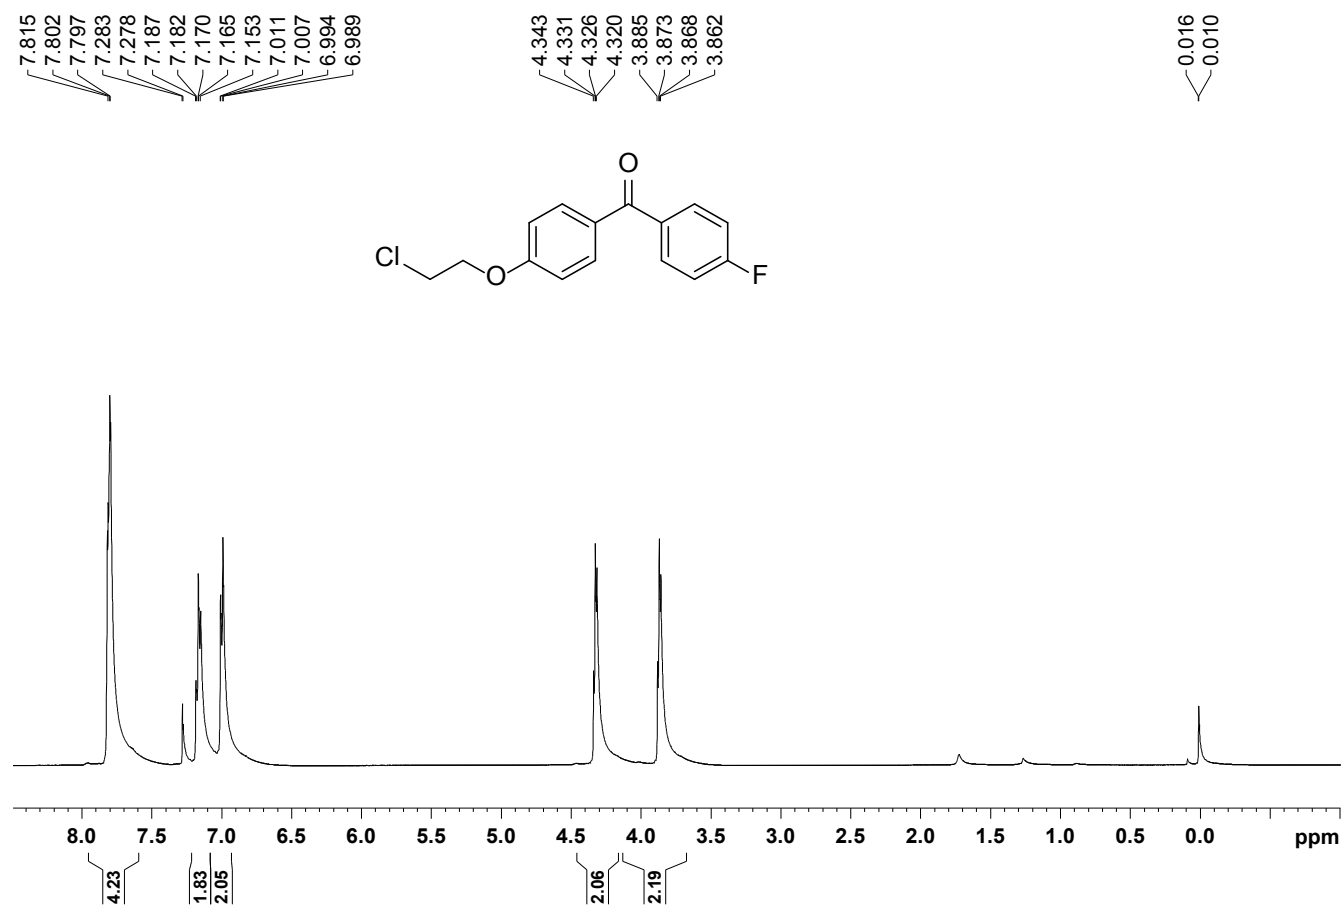

Figure S7. <sup>1</sup>H NMR (500 MHz, CDCl<sub>3</sub>) of **6e'**

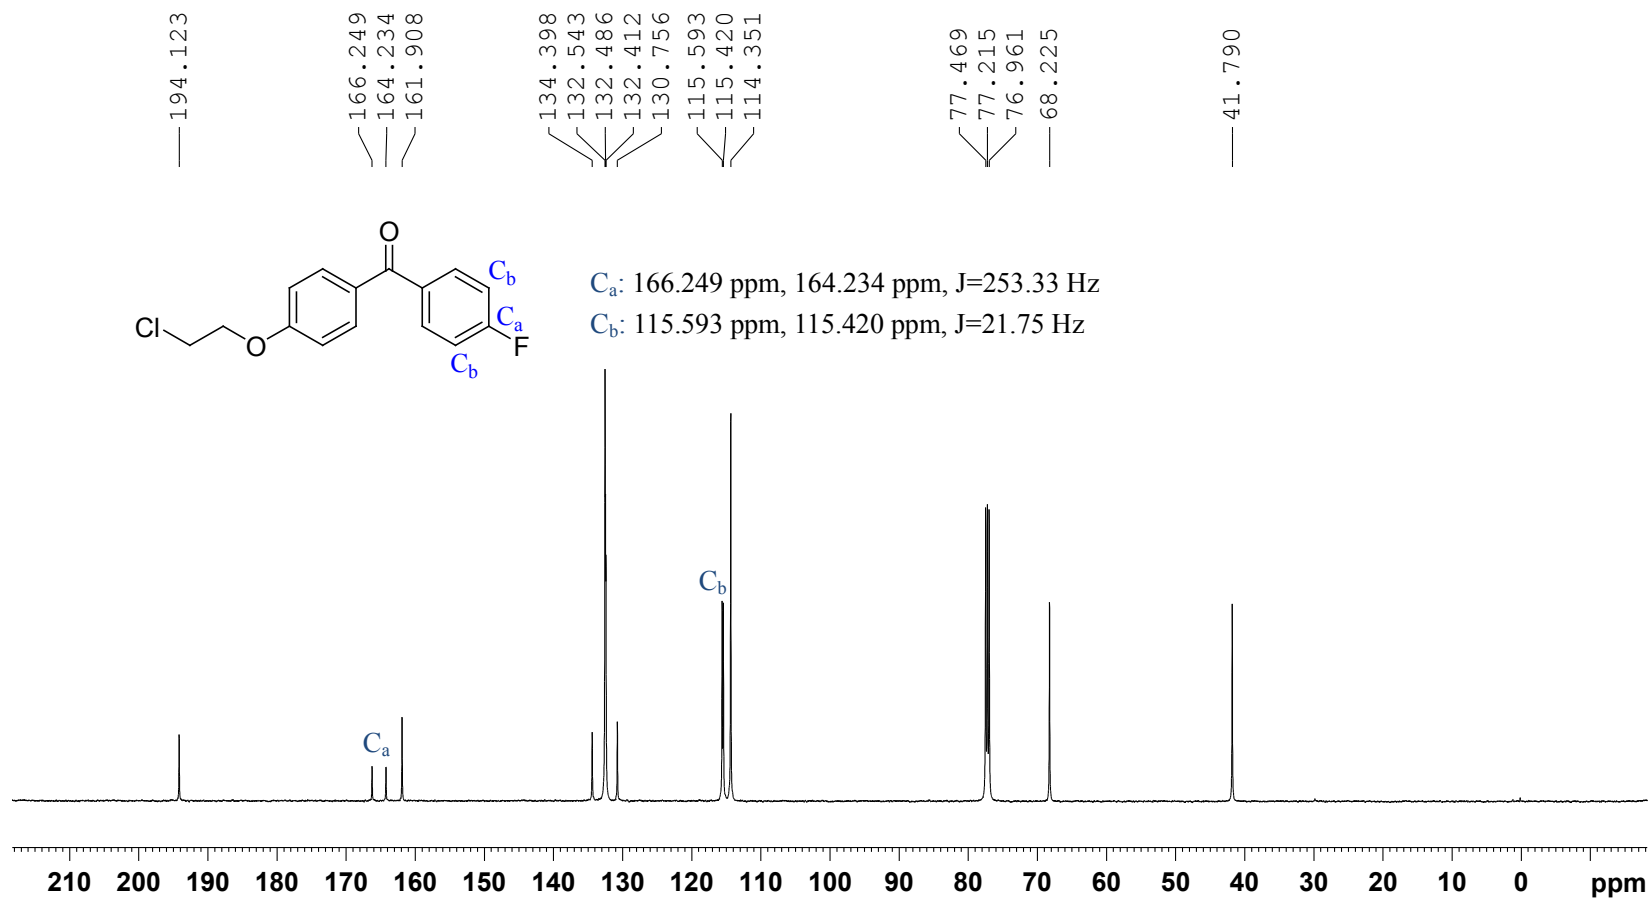

Figure 58.  $^{13}\text{C}$  NMR (125MHz,  $\text{CDCl}_3$ ) of **6e'**

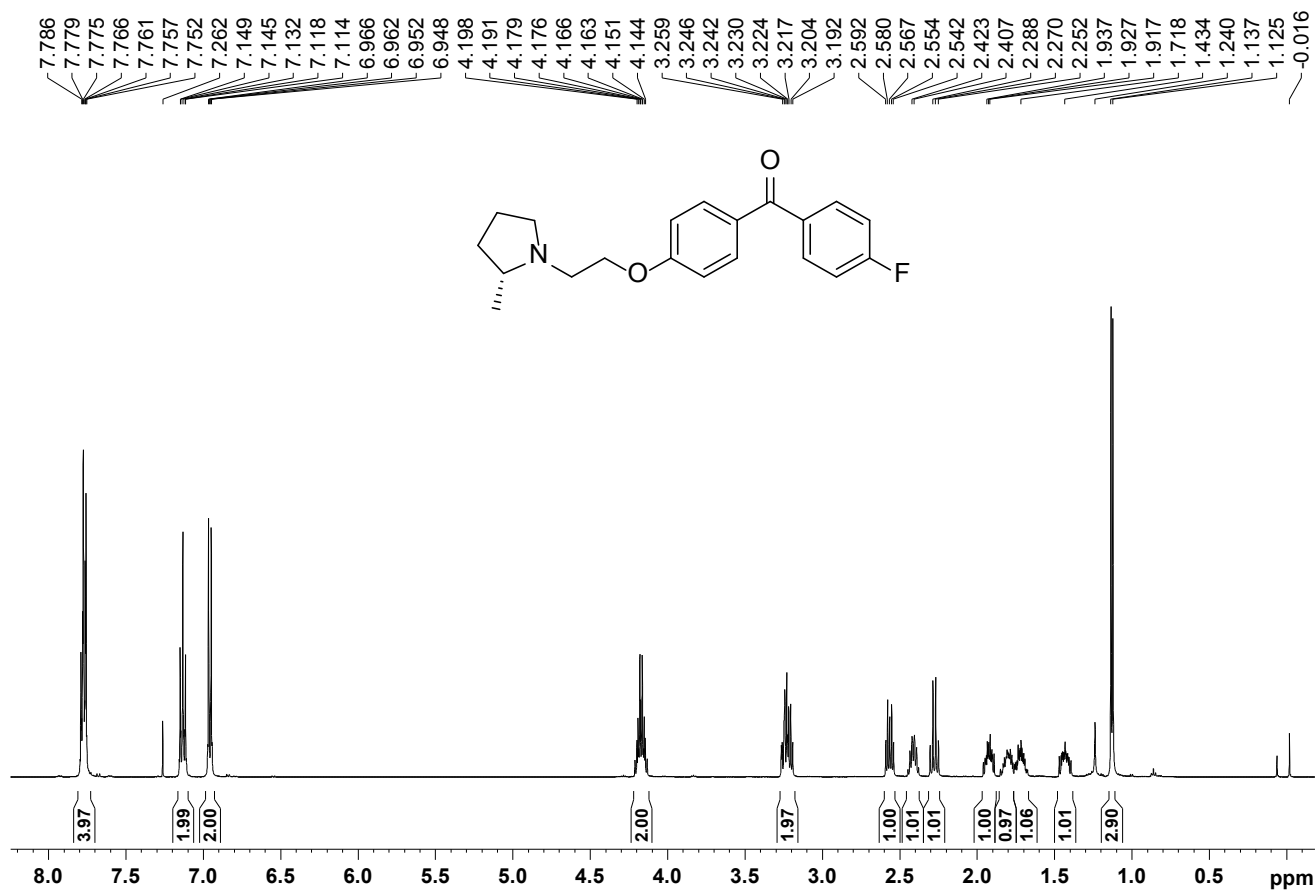

Figure 59. <sup>1</sup>H NMR (500MHz, CDCl<sub>3</sub>) of 7e'

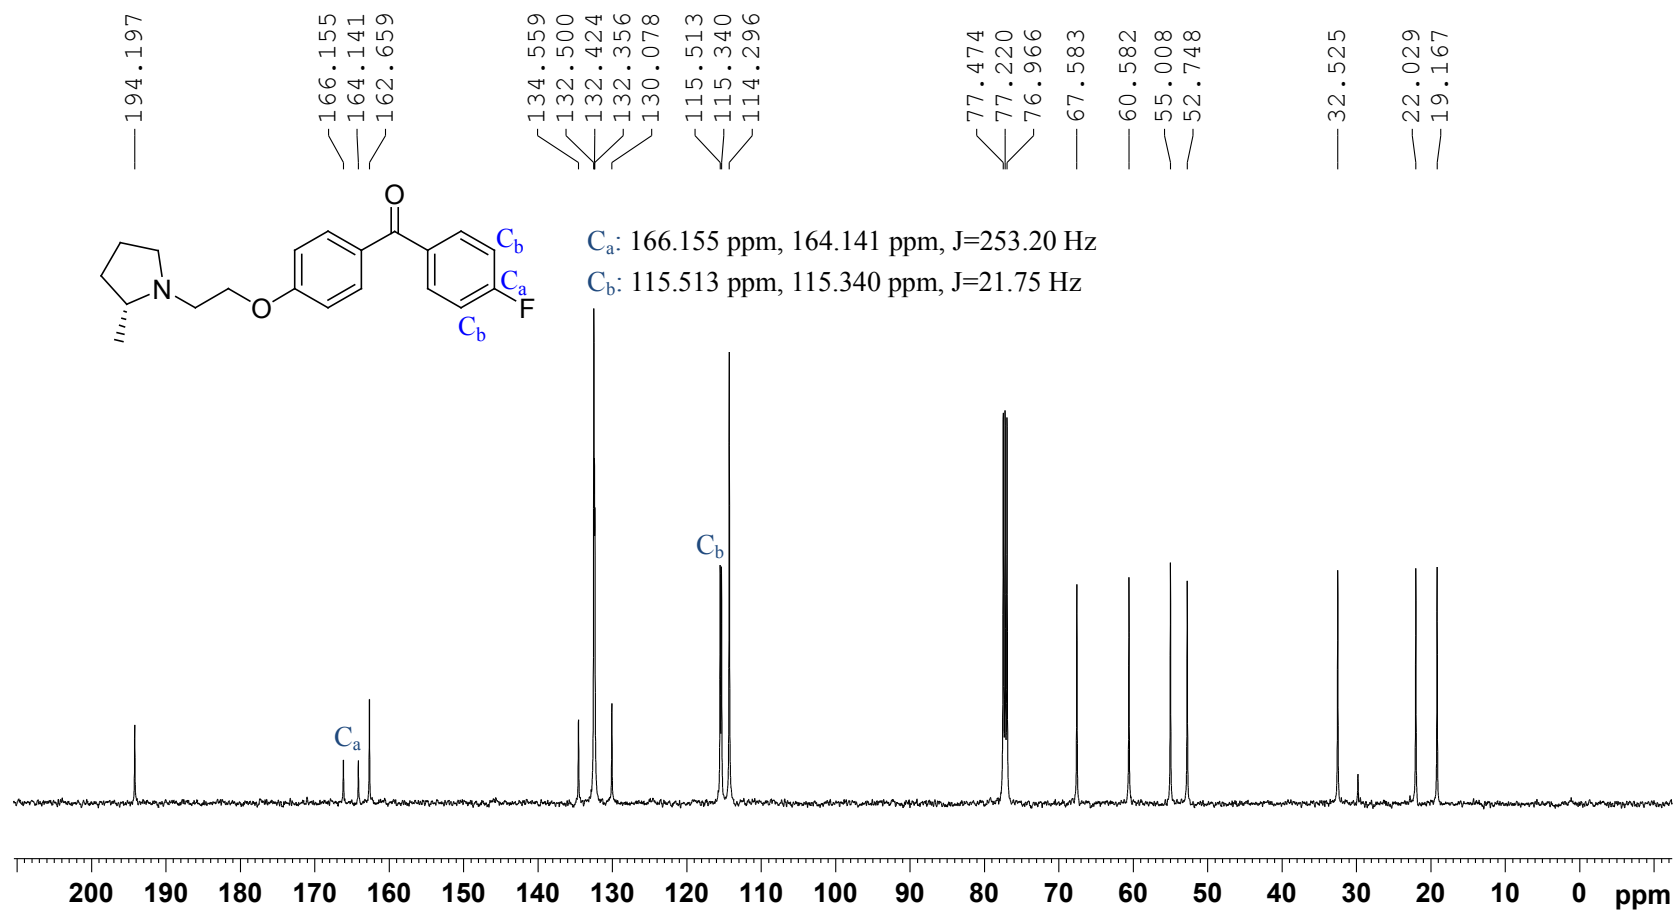

Figure 60. <sup>13</sup>C NMR (125MHz, CDCl<sub>3</sub>) of **7e'**



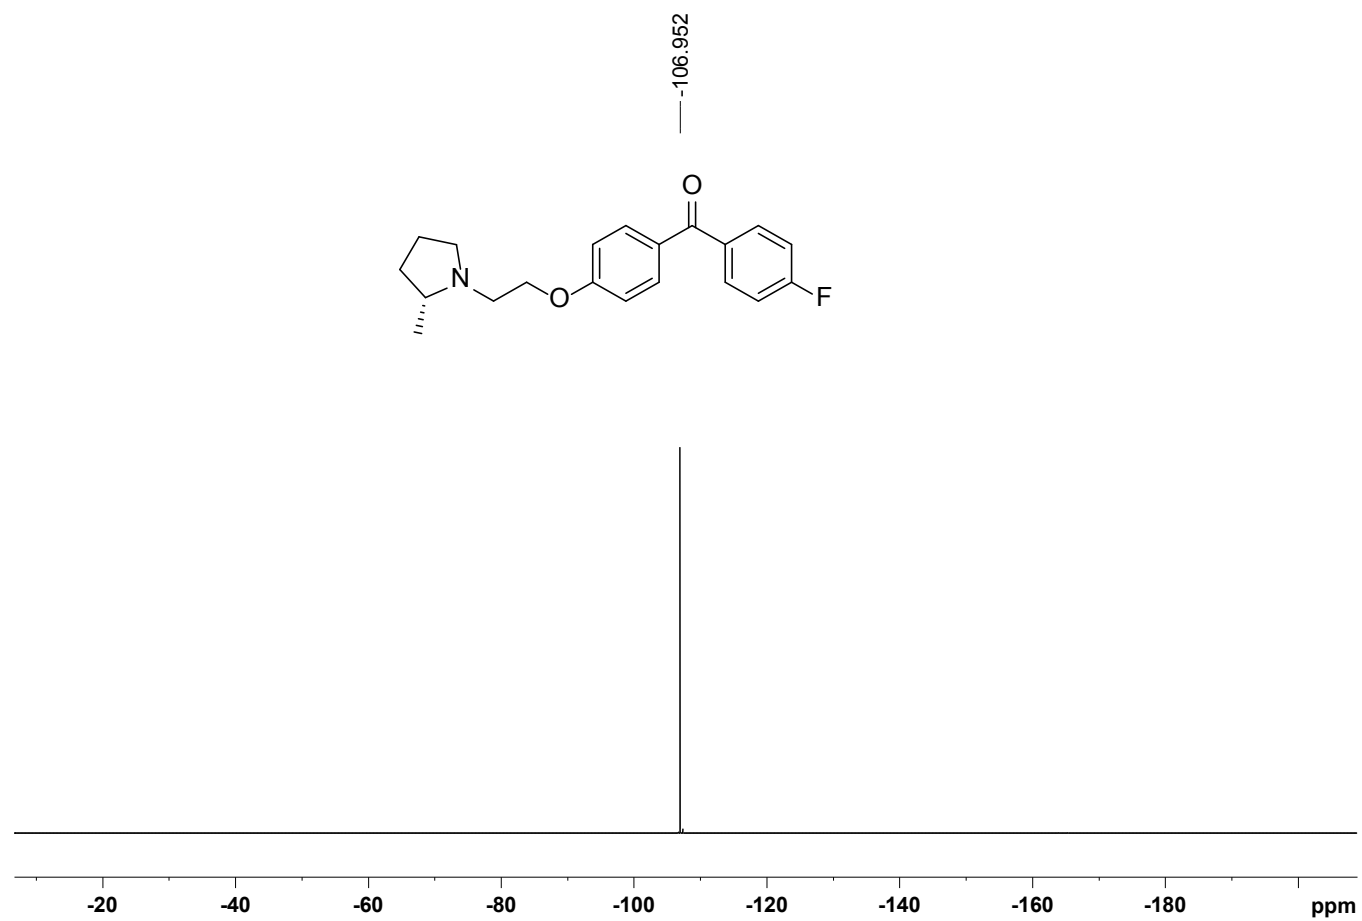

Figure 61.  $^{19}\text{F}$  NMR (470MHz,  $\text{CDCl}_3$ ) of 7e'

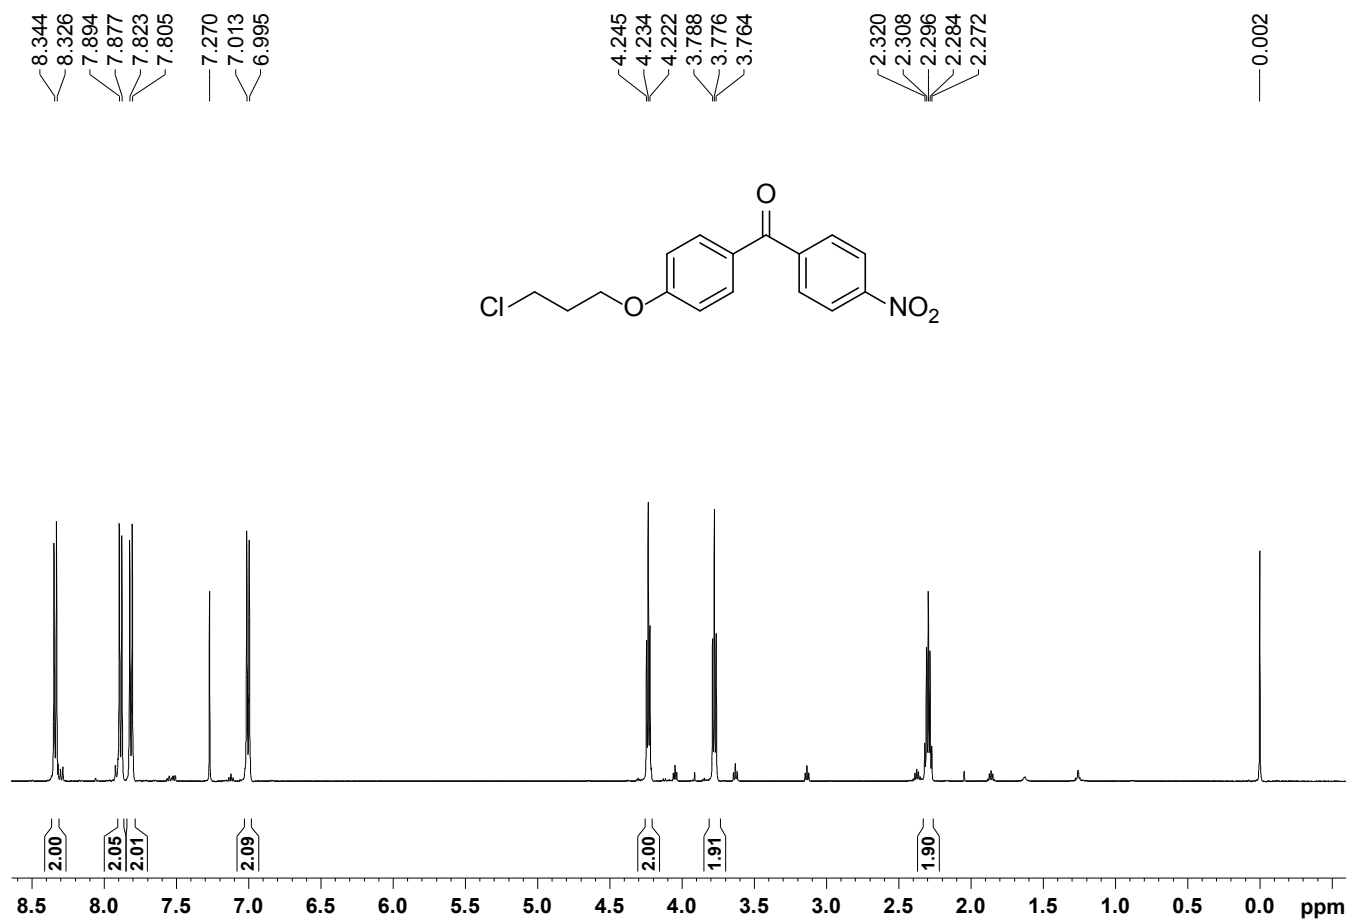

Figure 62. <sup>1</sup>H NMR (500MHz, CDCl<sub>3</sub>) of **6f**

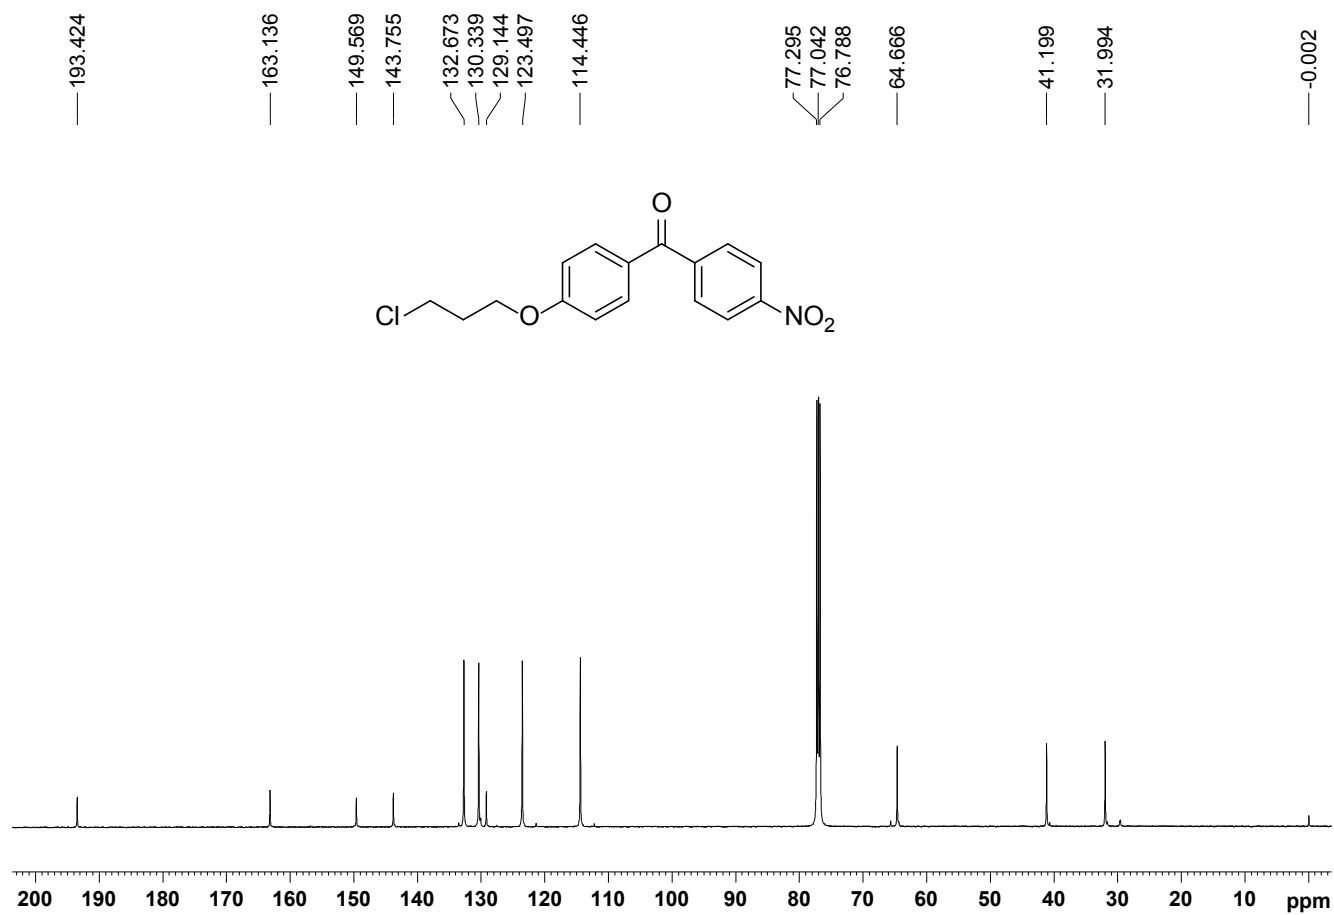

Figure 63.  $^{13}\text{C}$  NMR (125 MHz,  $\text{CDCl}_3$ ) of **6f**

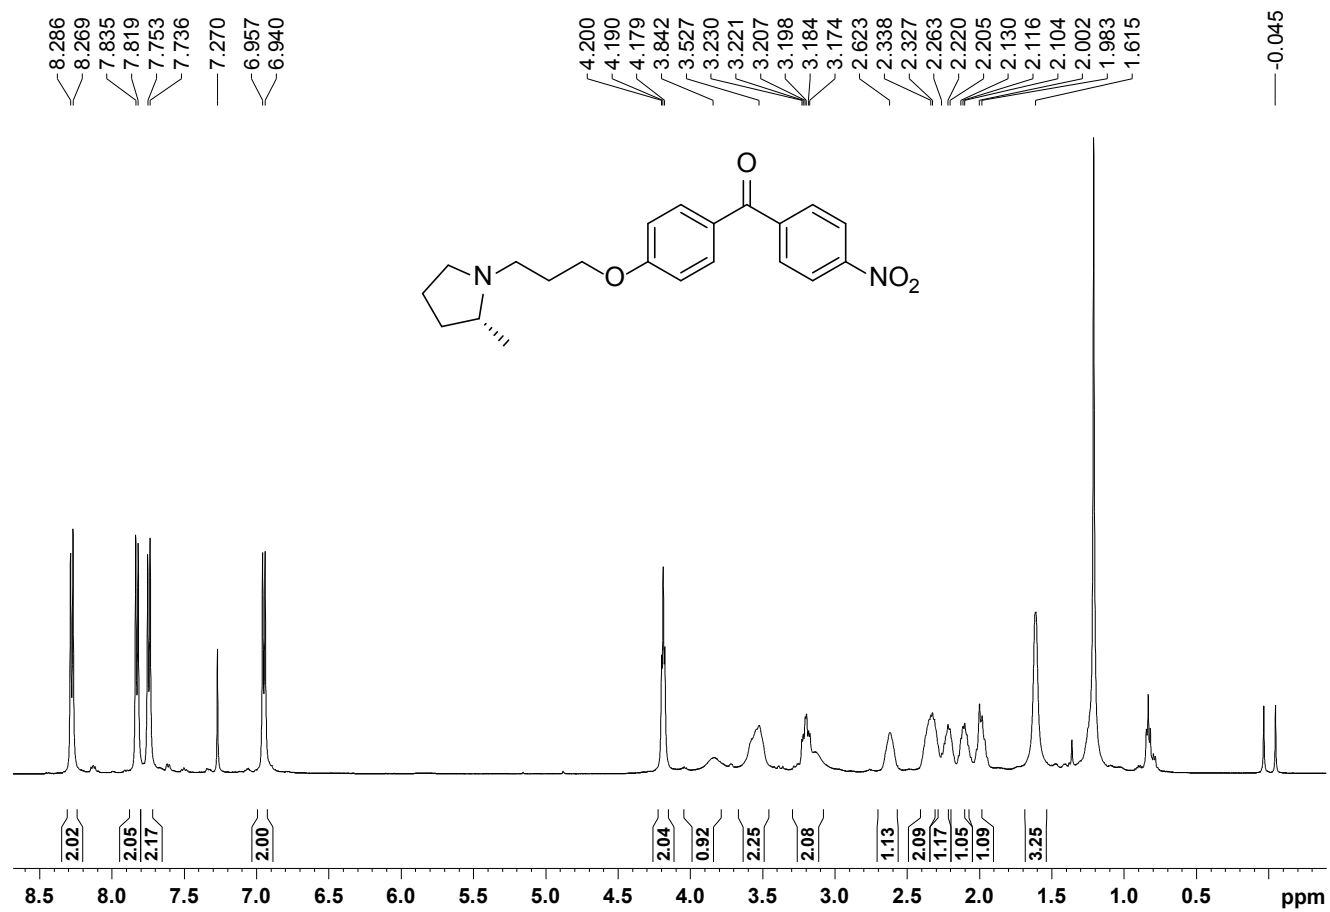

Figure 64. <sup>1</sup>H NMR (500MHz, CDCl<sub>3</sub>) of **7f**

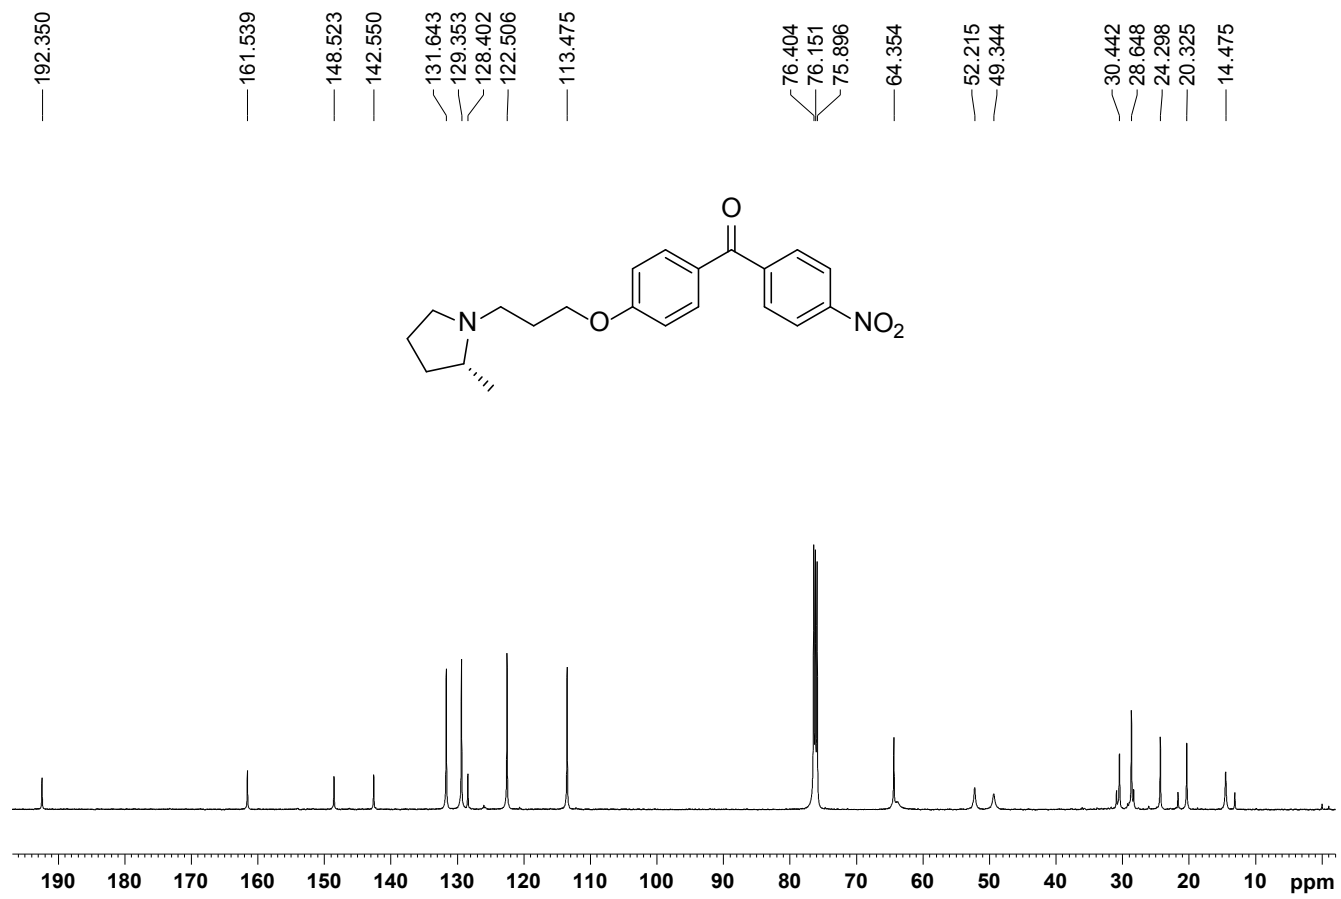

Figure 65. <sup>13</sup>C NMR (125MHz, CDCl<sub>3</sub>) of 7f

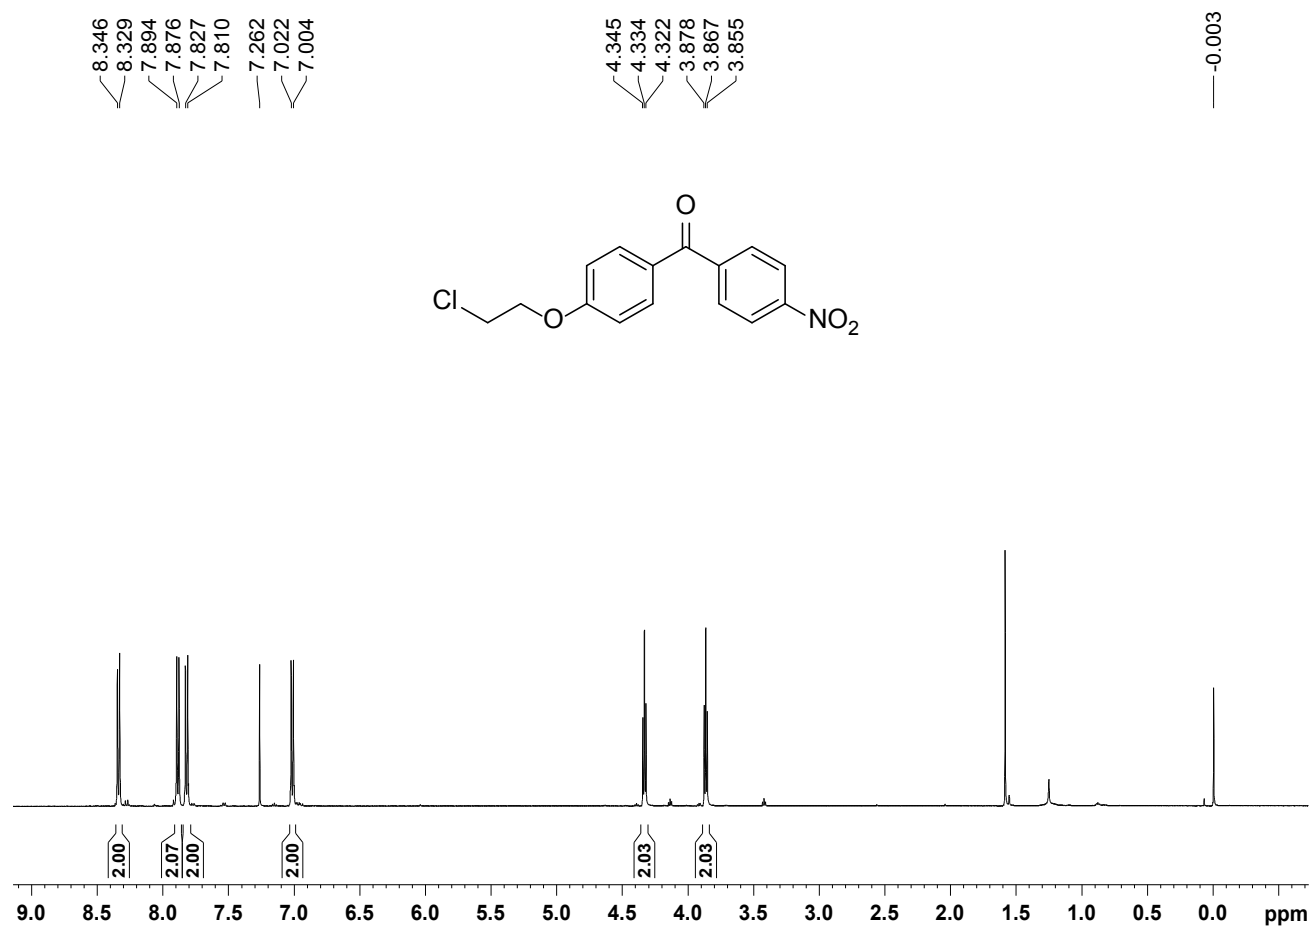

Figure 66. <sup>1</sup>H NMR (500MHz, CDCl<sub>3</sub>) of **6f**

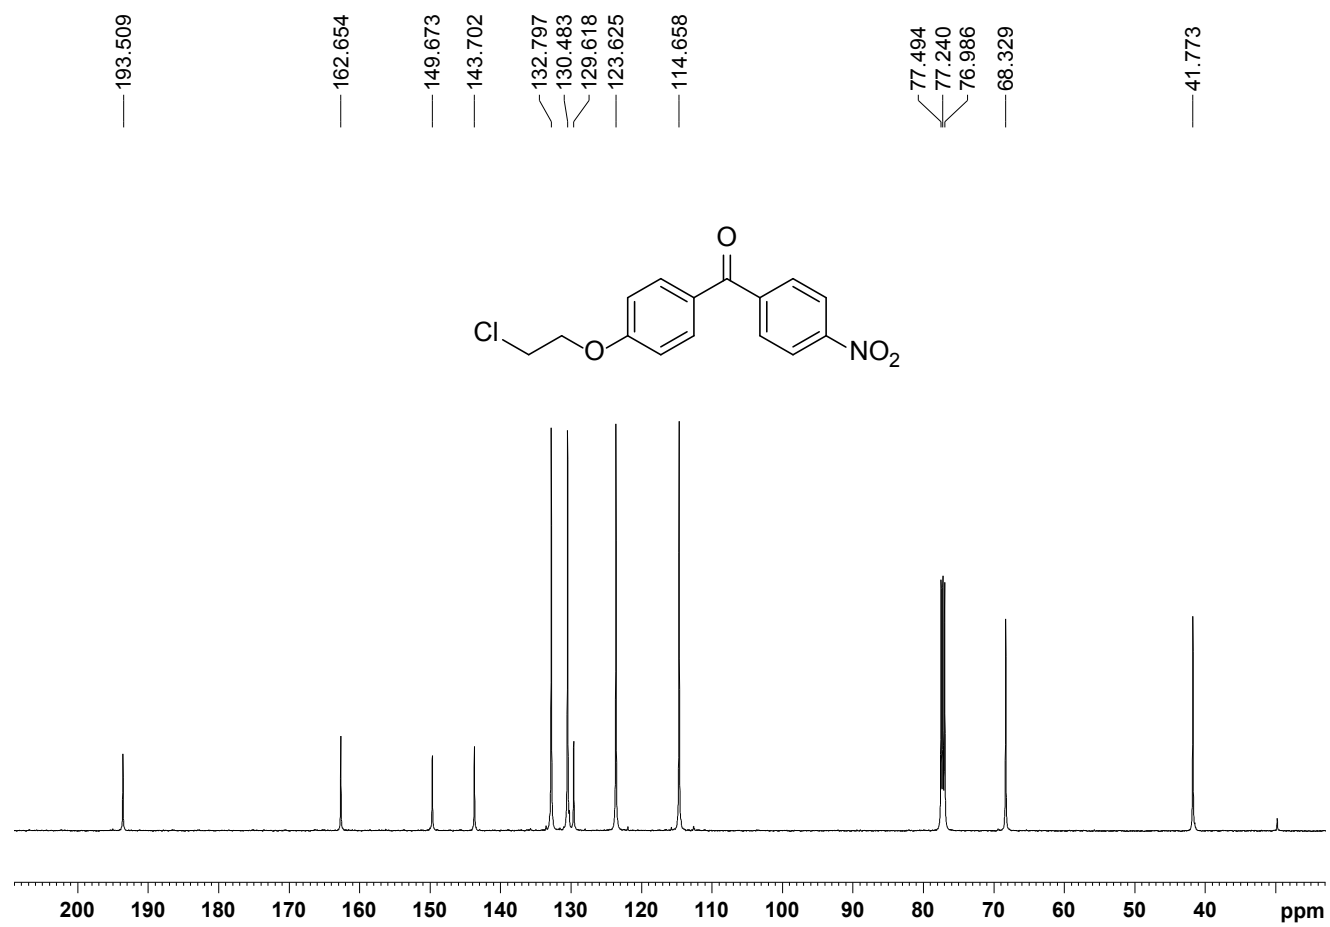

Figure 67.  $^{13}\text{C}$  NMR (125 MHz,  $\text{CDCl}_3$ ) of **6f**

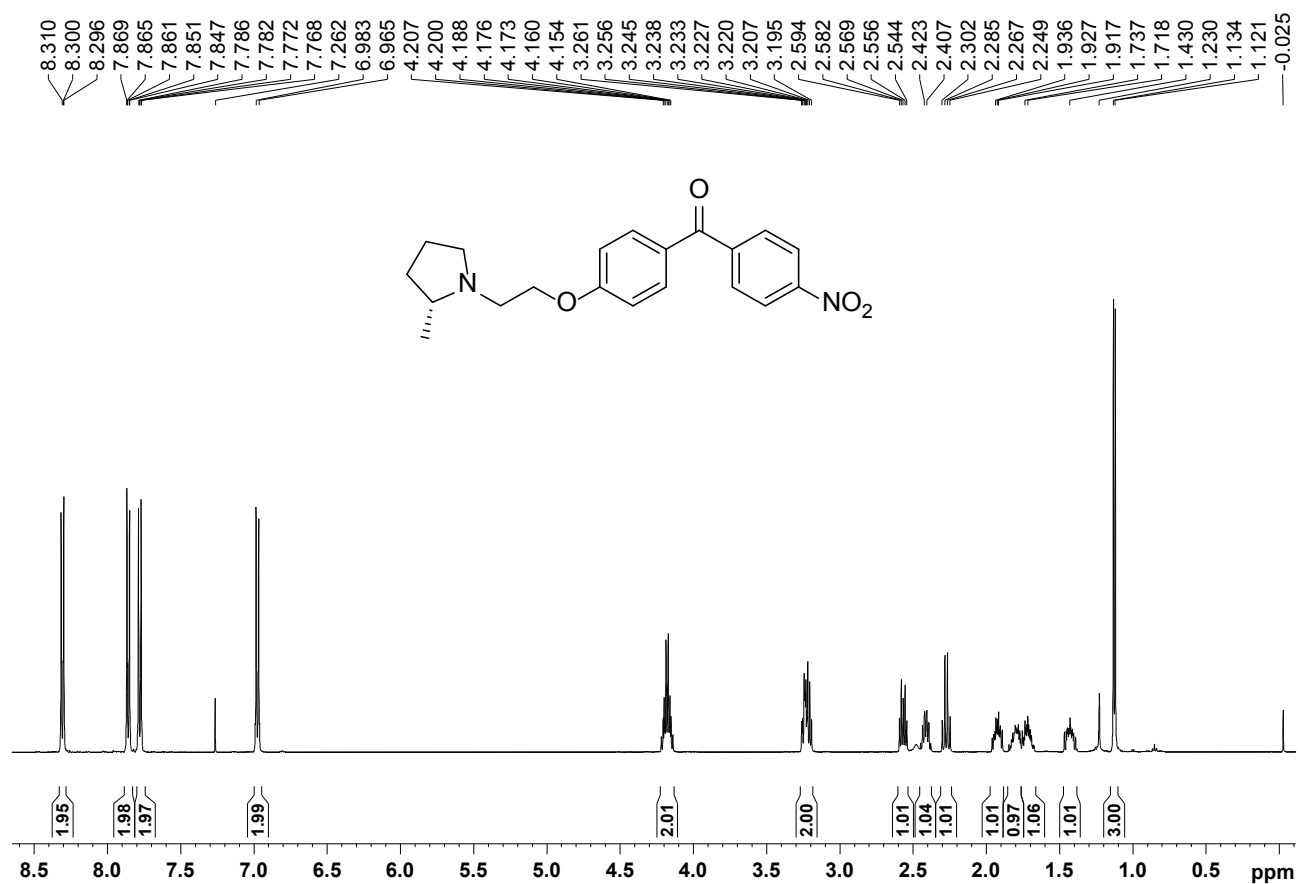

Figure 68. <sup>1</sup>H NMR (500MHz, CDCl<sub>3</sub>) of 7f



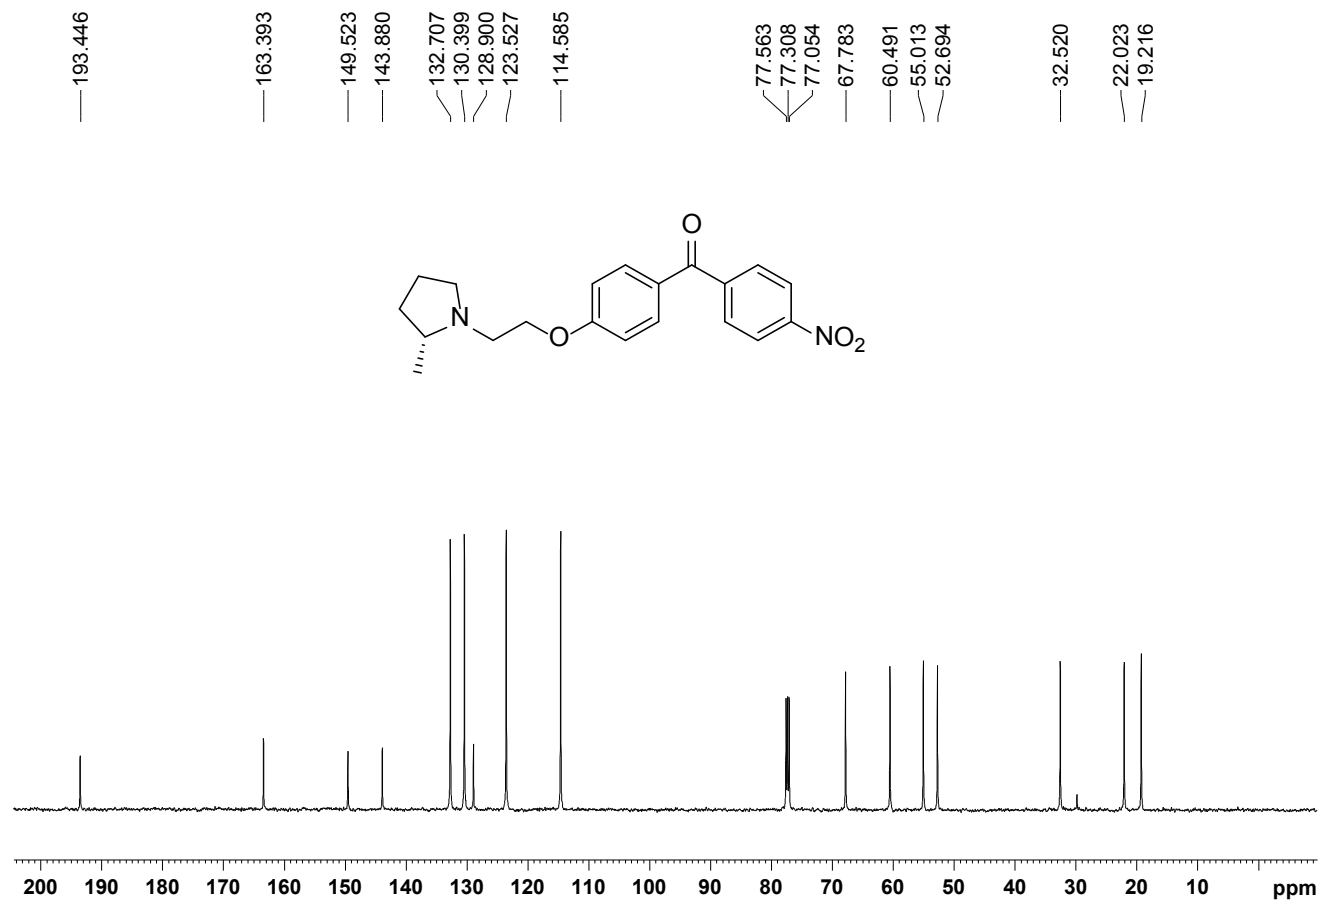

Figure 69.  $^{13}\text{C}$  NMR (125 MHz,  $\text{CDCl}_3$ ) of **7f**

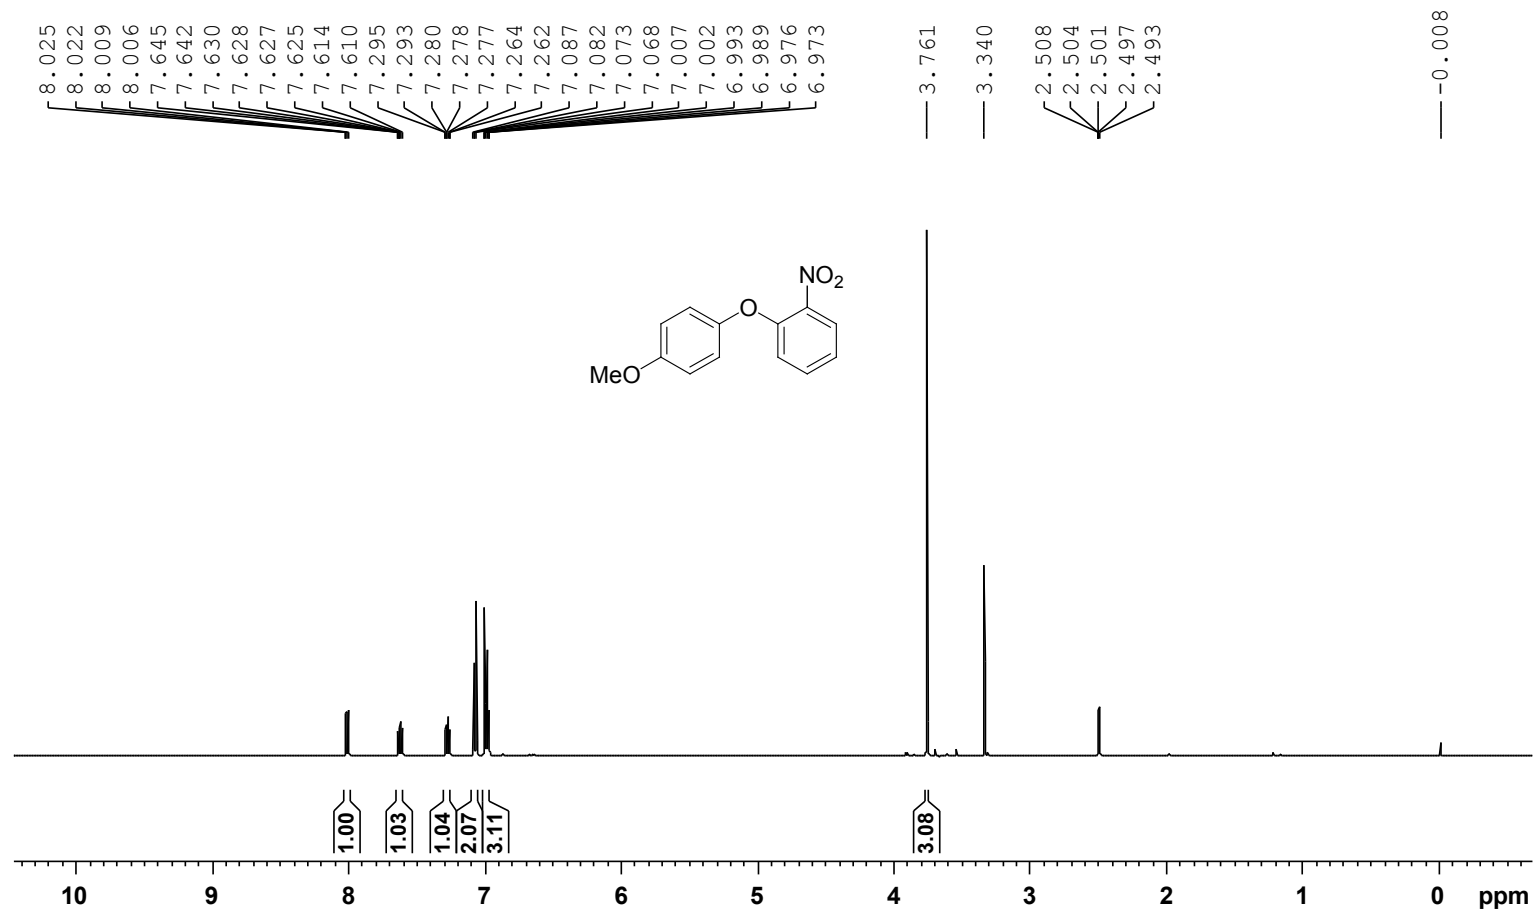

Figure 70. <sup>1</sup>H NMR (500MHz, DMSO-d<sub>6</sub>) of **2B**

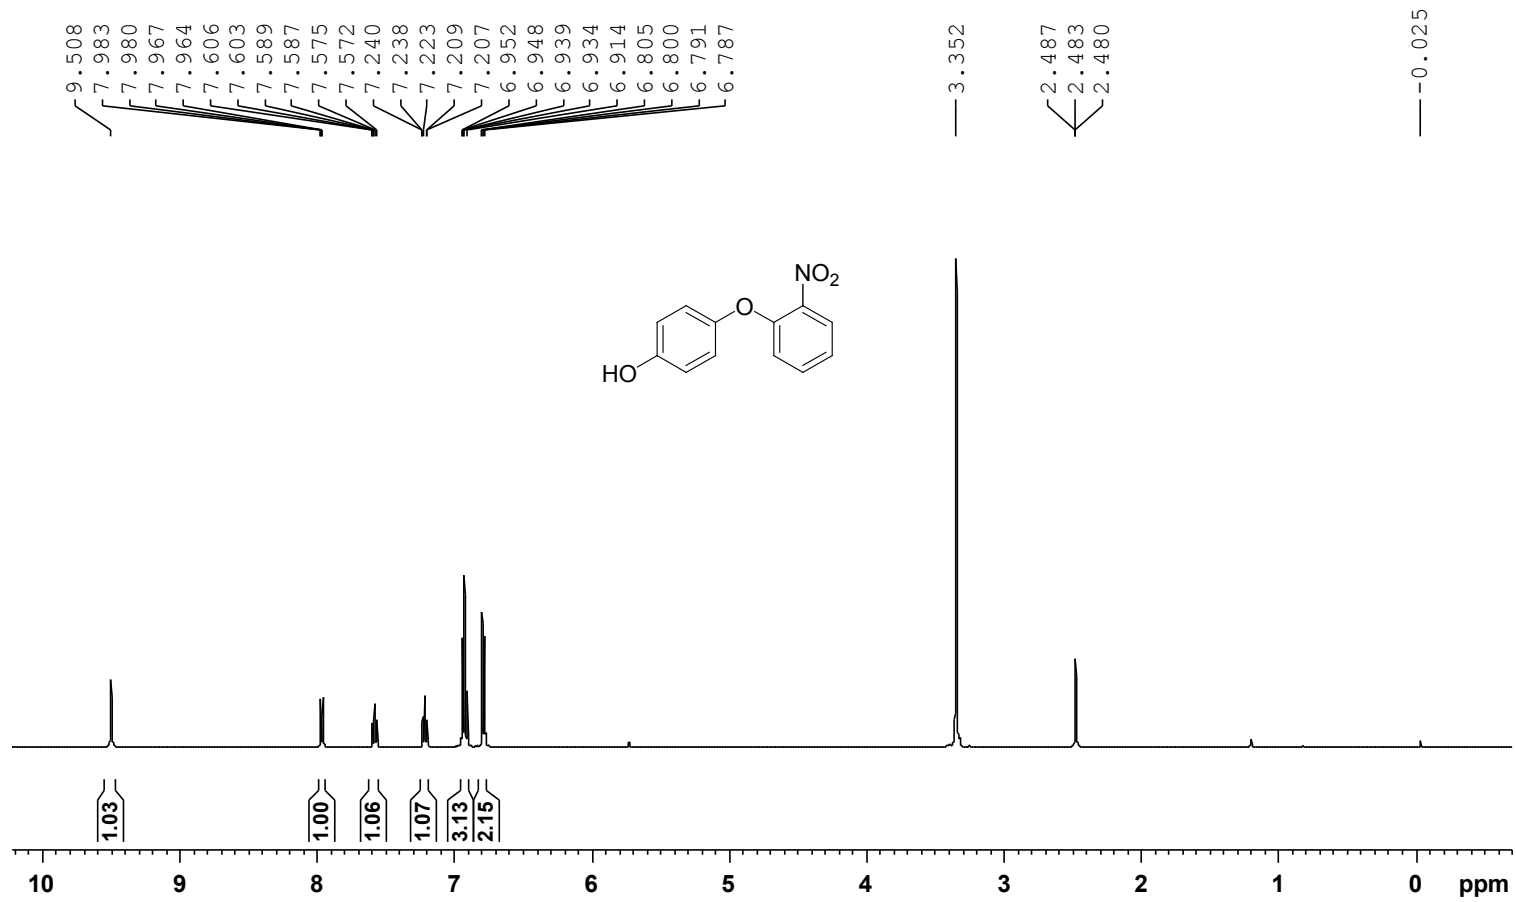

Figure 71. <sup>1</sup>H NMR (500MHz, DMSO-d<sub>6</sub>) of **3B**

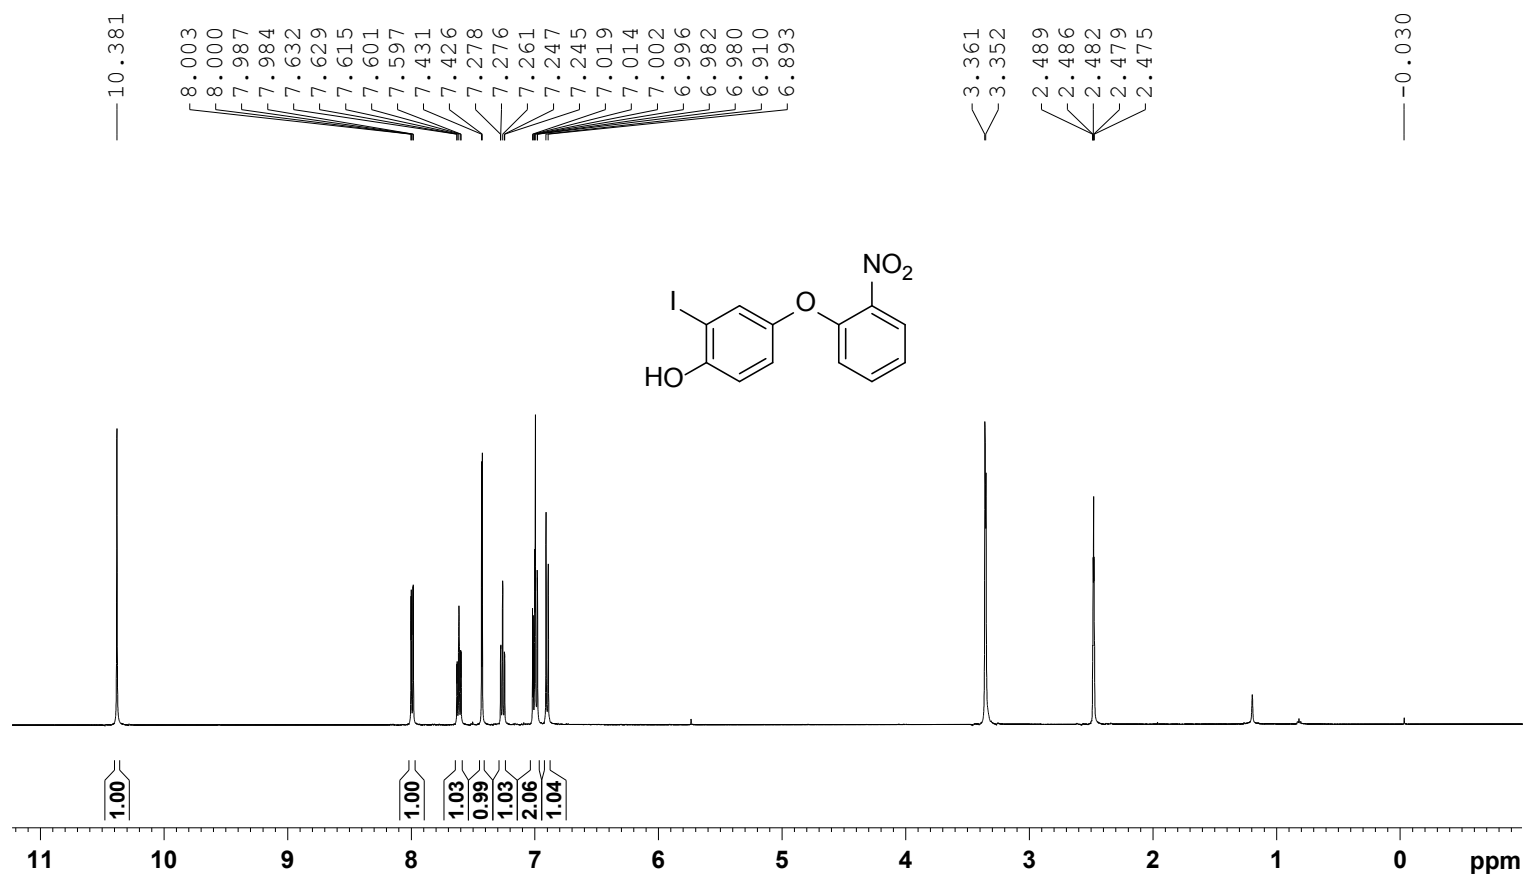

Figure 72. <sup>1</sup>H NMR (500MHz, DMSO-d<sub>6</sub>) of **4B**

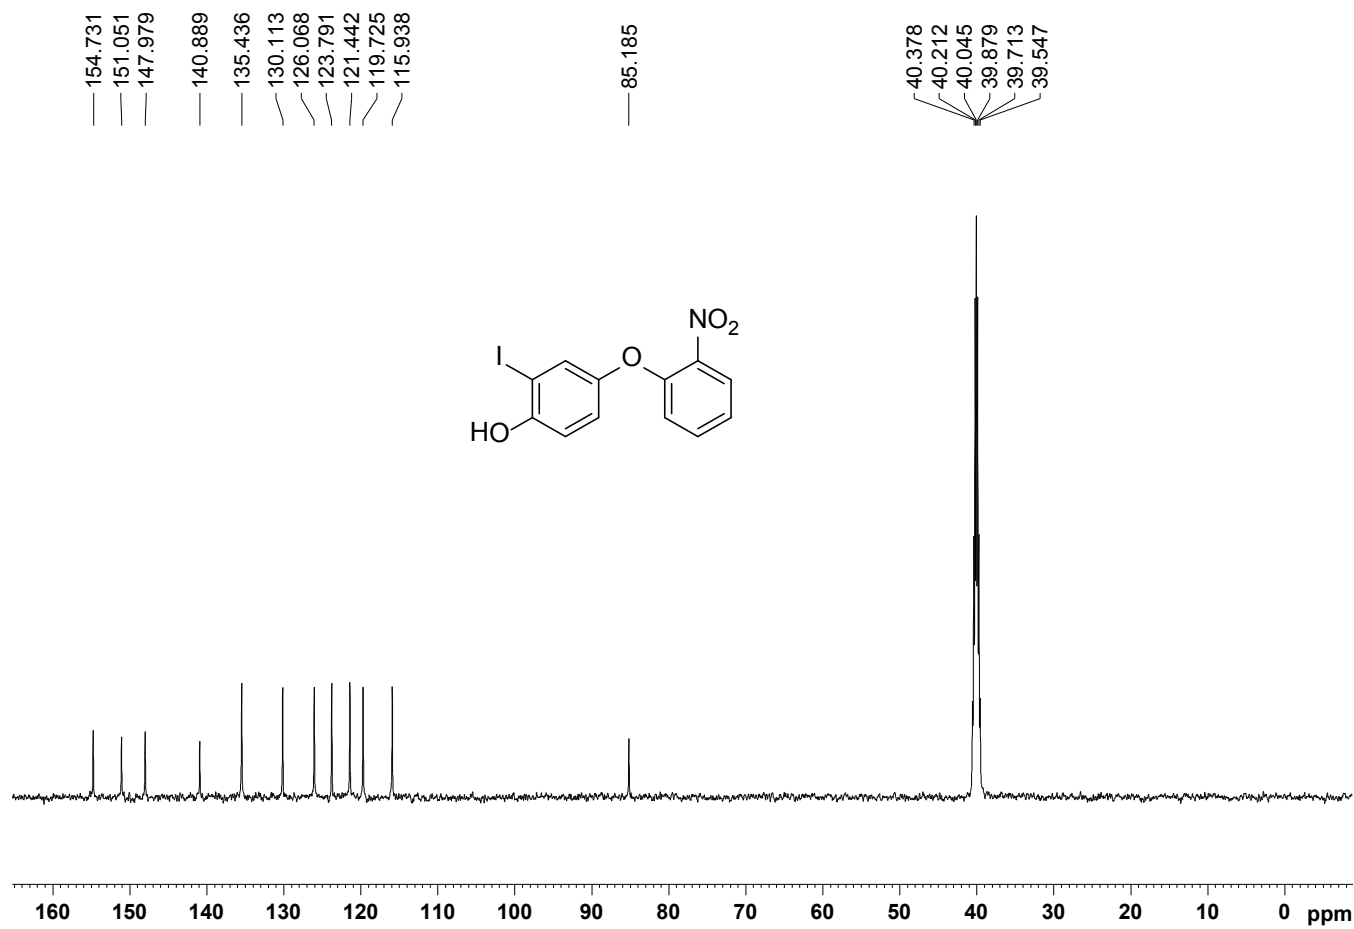

Figure 73. <sup>13</sup>C NMR (125MHz, DMSO-d<sub>6</sub>) of **4B**

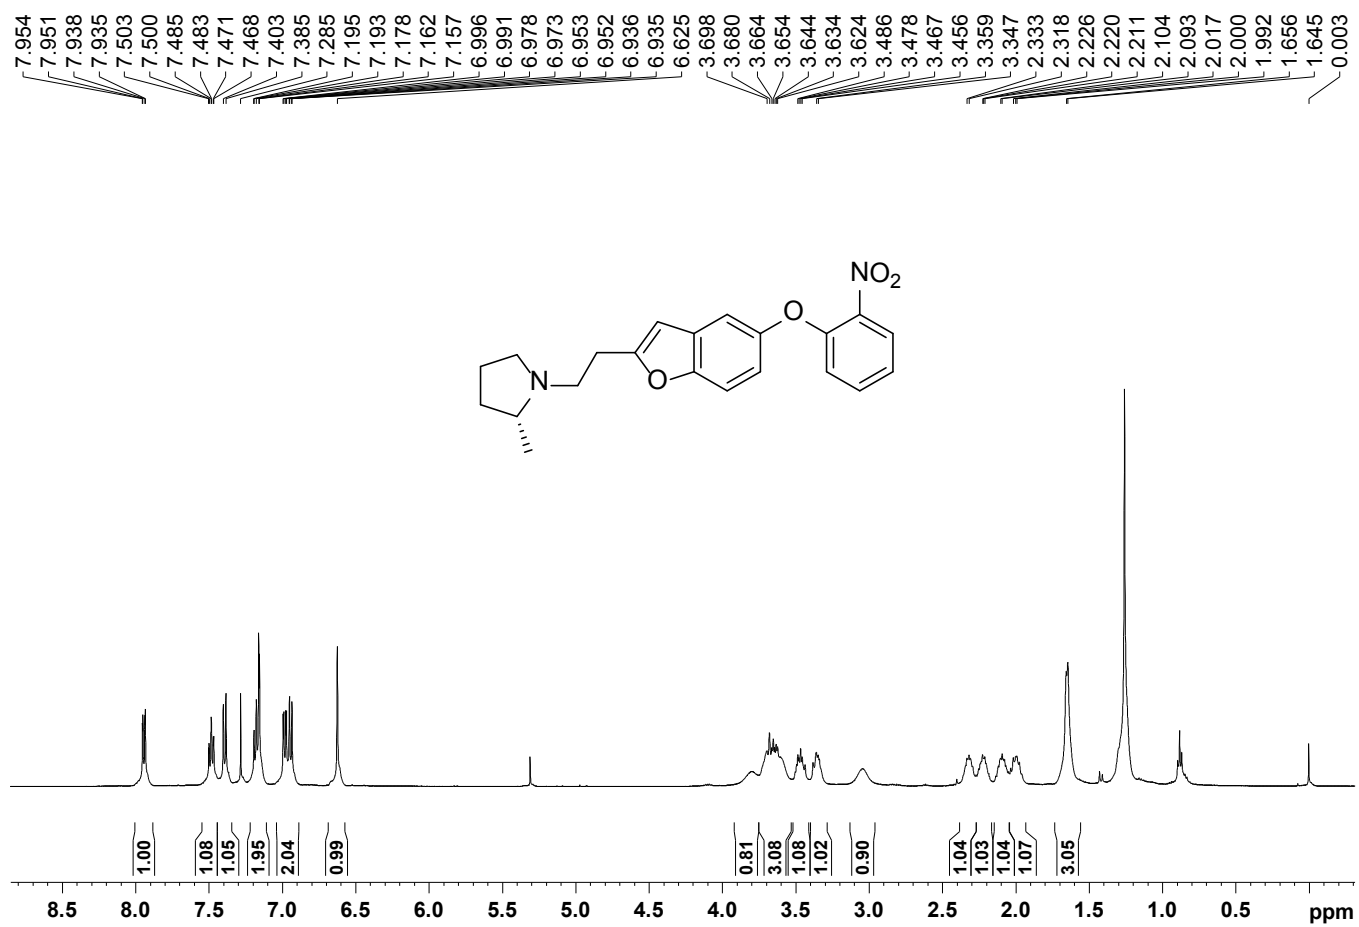

Figure 74. <sup>1</sup>H NMR (500MHz, CDCl<sub>3</sub>) of **5B**

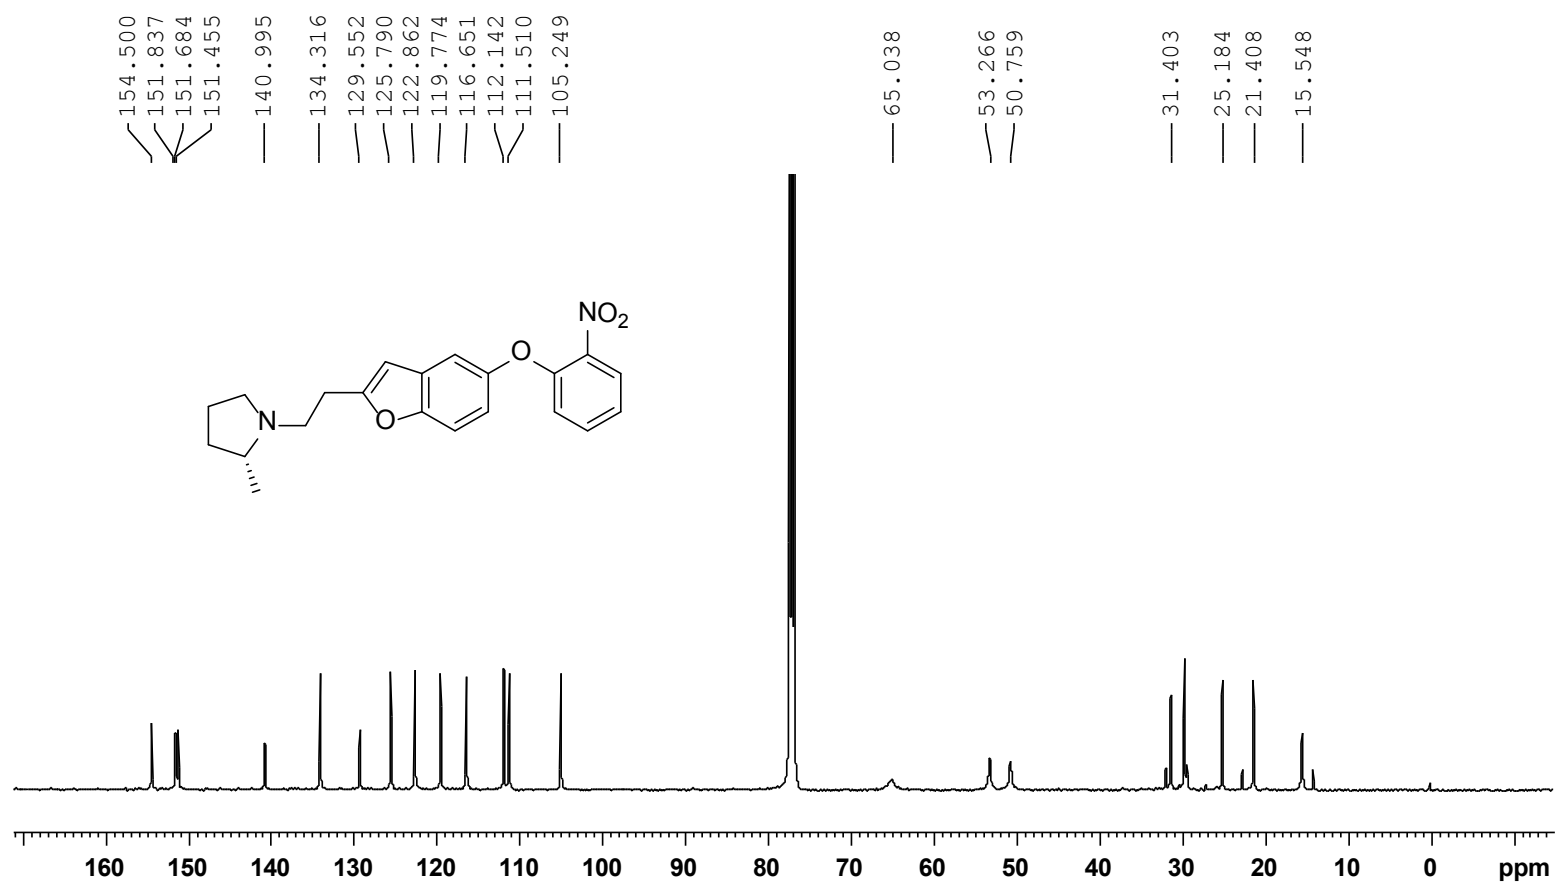

Figure 75. <sup>13</sup>C NMR (125MHz, CDCl<sub>3</sub>) of **5B**

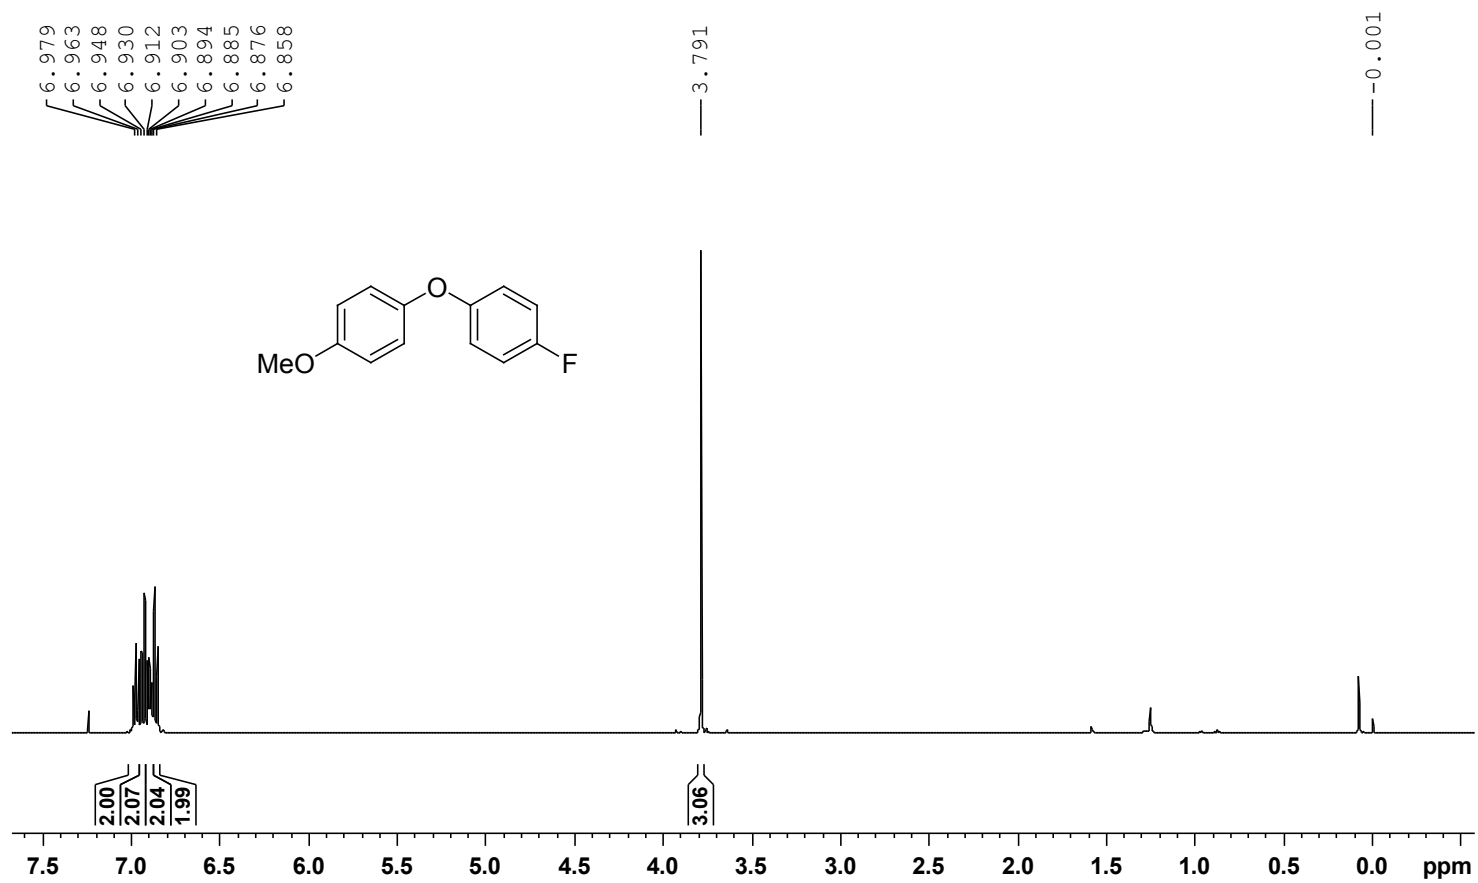

Figure 76. <sup>1</sup>H NMR (500MHz, CDCl<sub>3</sub>) of **2E**



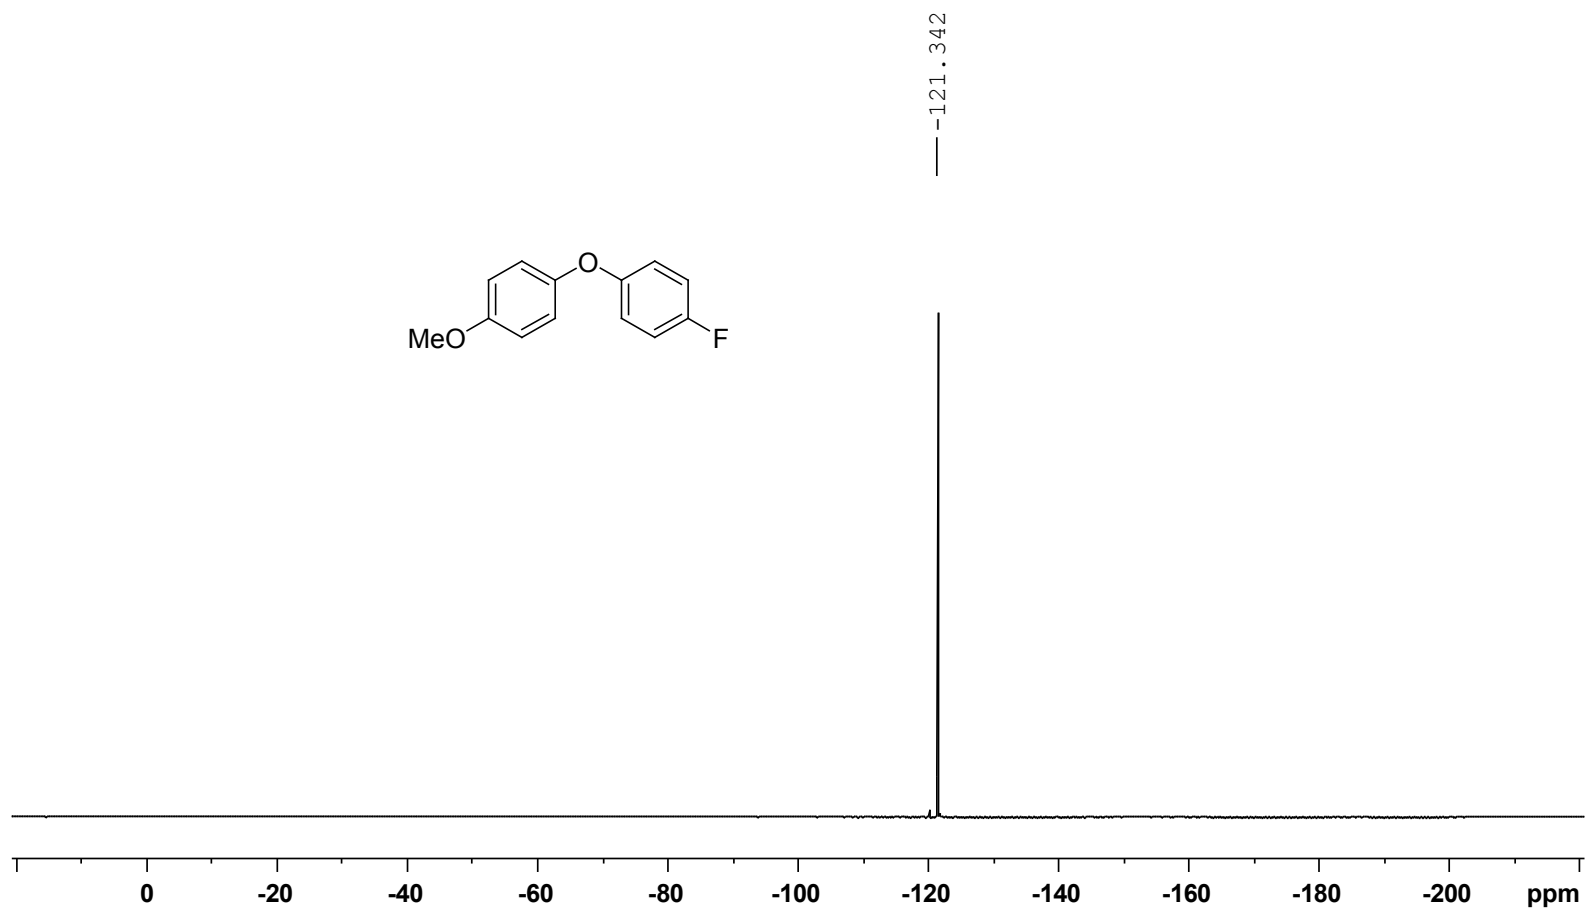

Figure 77.  $^{19}\text{F}$  NMR (470MHz,  $\text{CDCl}_3$ ) of **2E**

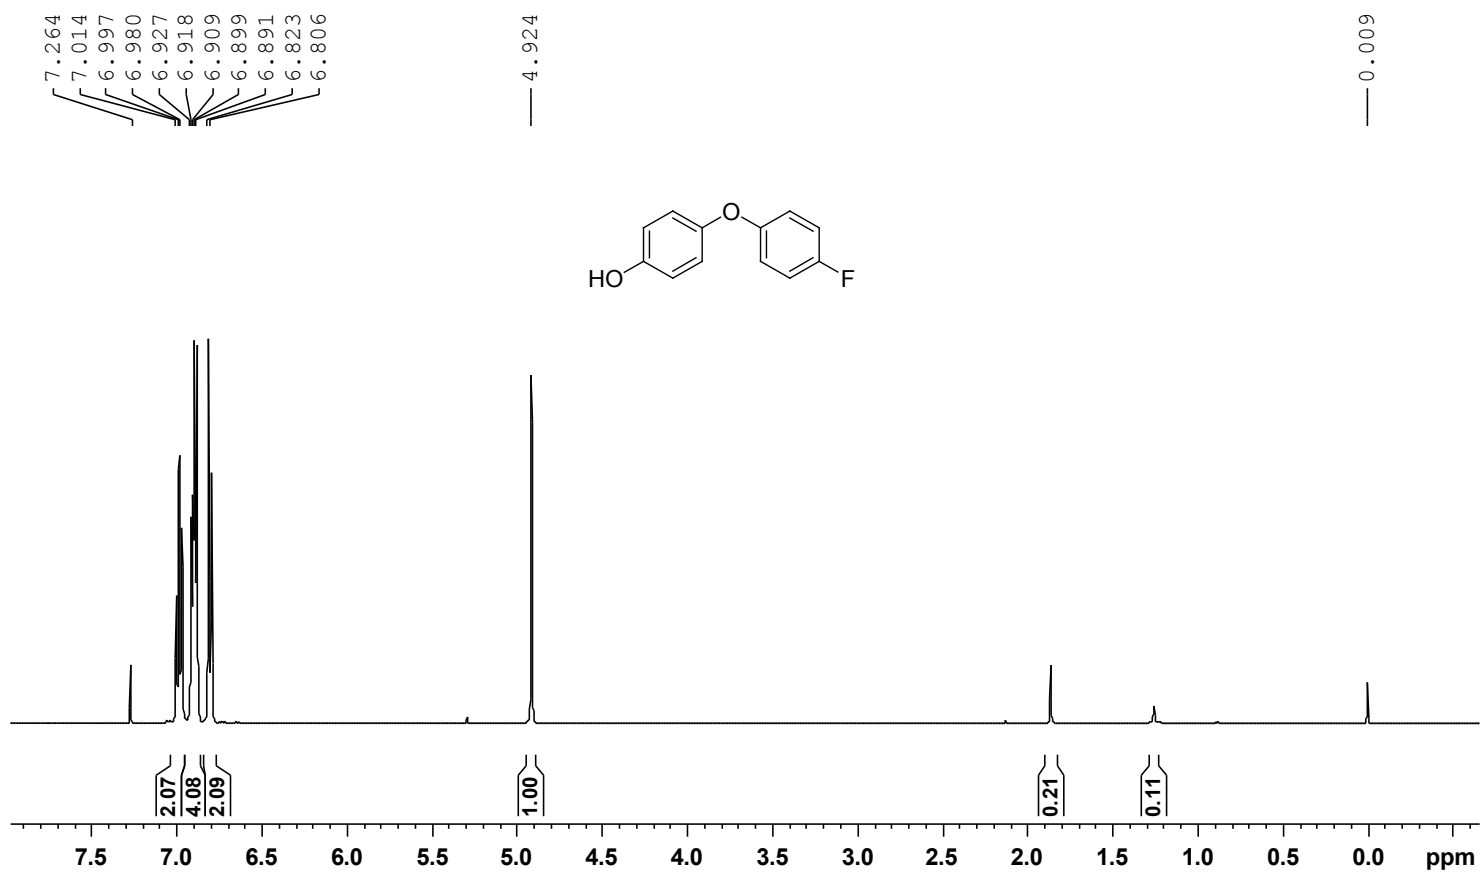

Figure 78. <sup>1</sup>H NMR (500MHz, CDCl<sub>3</sub>) of 3E

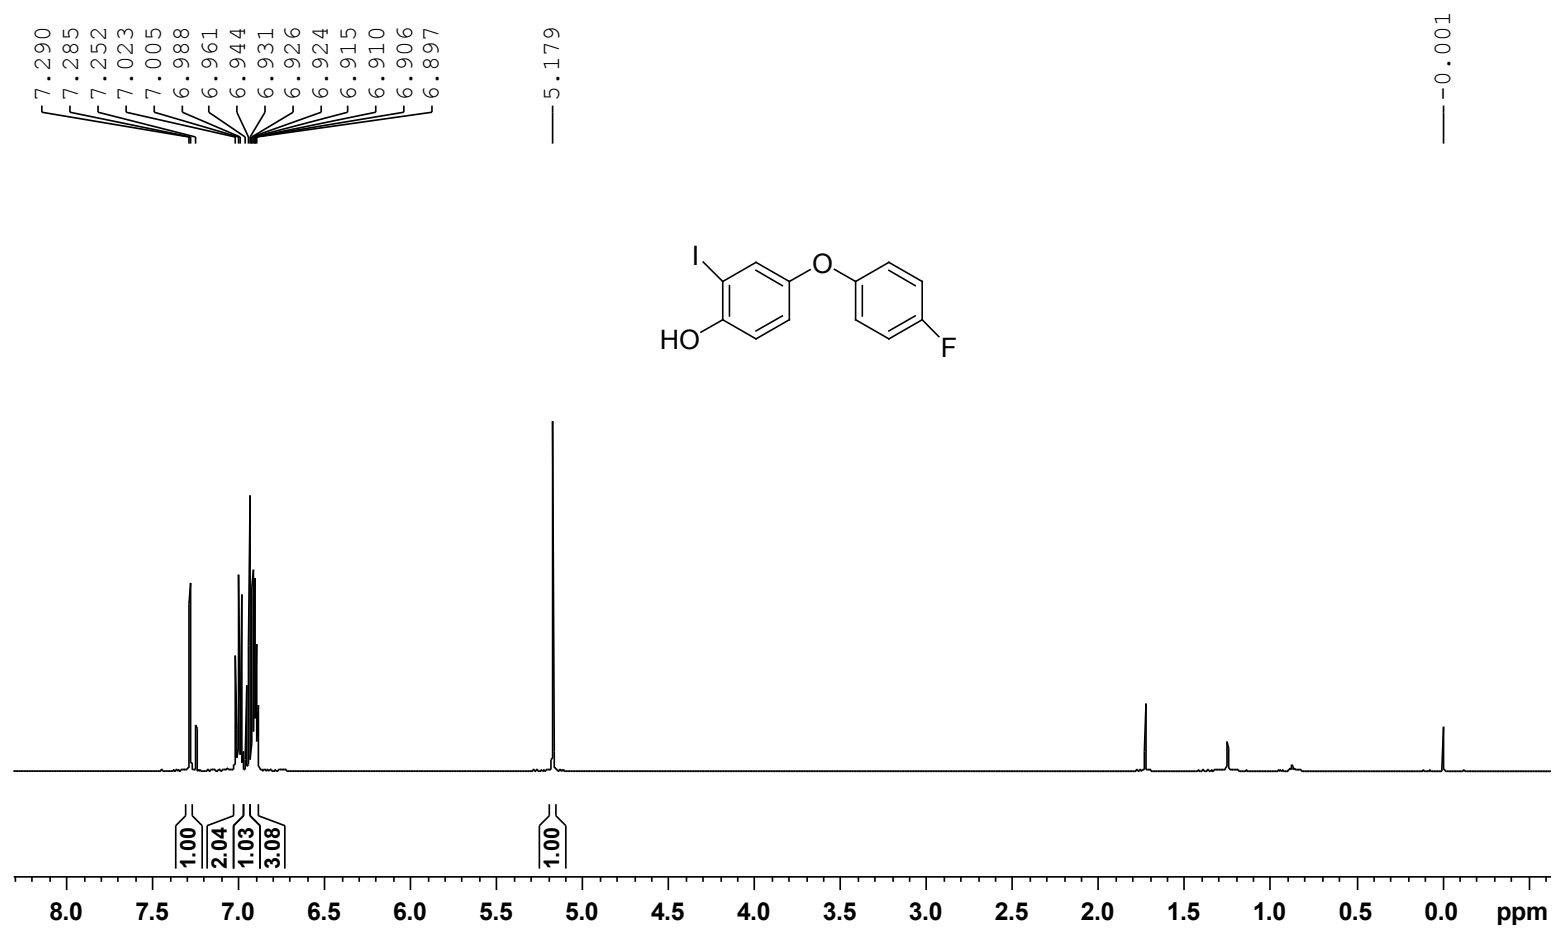

Figure 79.  $^1\text{H}$  NMR (500MHz,  $\text{CDCl}_3$ ) of **4E**

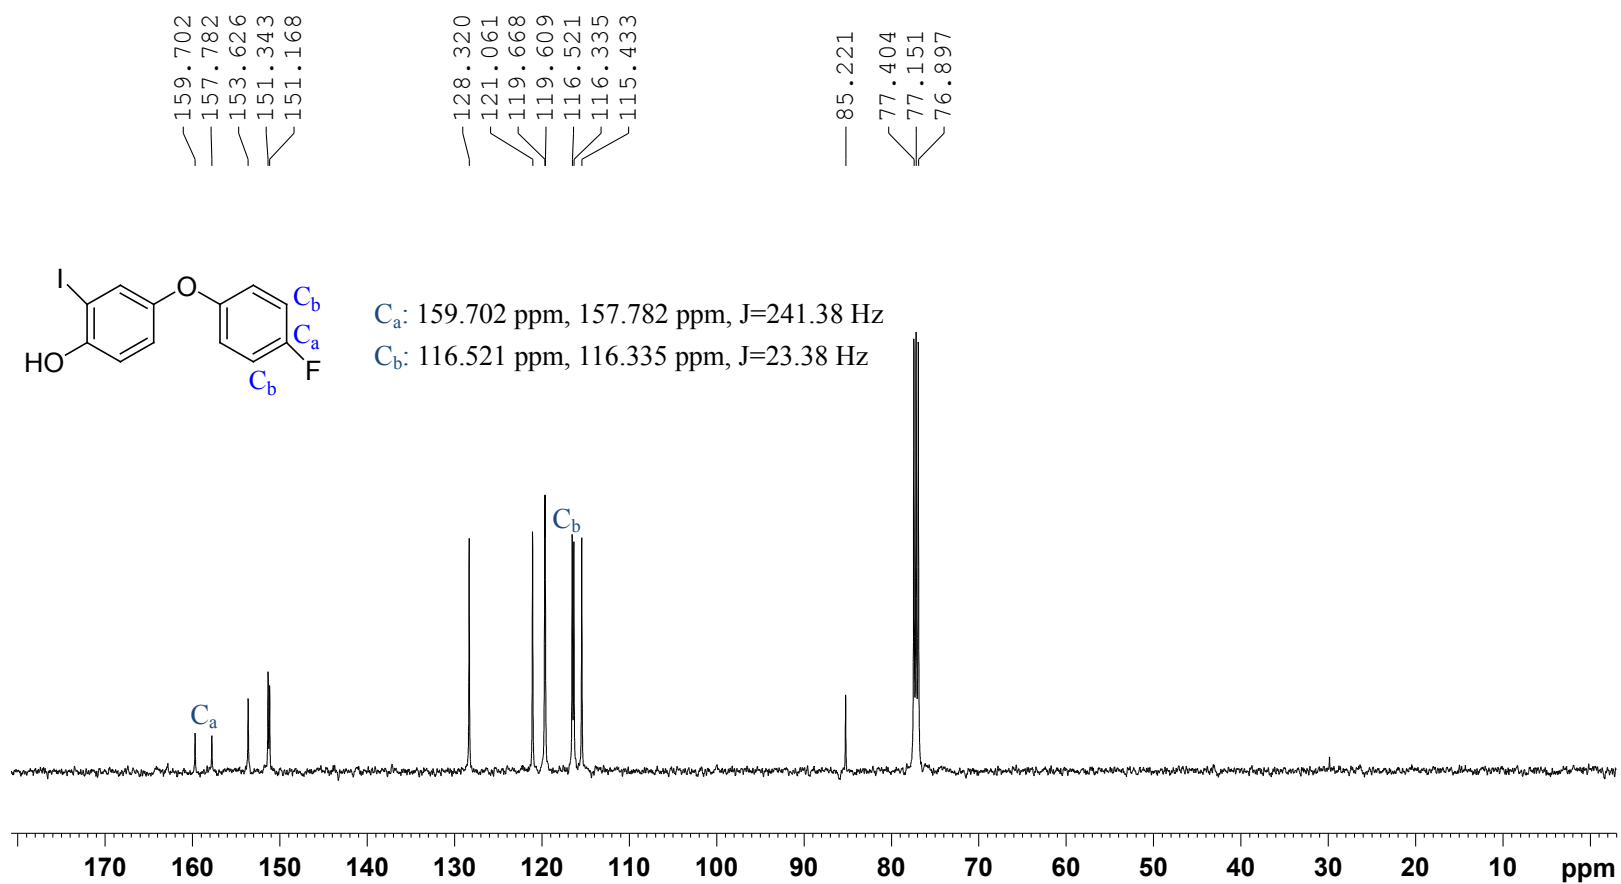

Figure 80.  $^{13}\text{C}$  NMR (125MHz,  $\text{CDCl}_3$ ) of **4E**

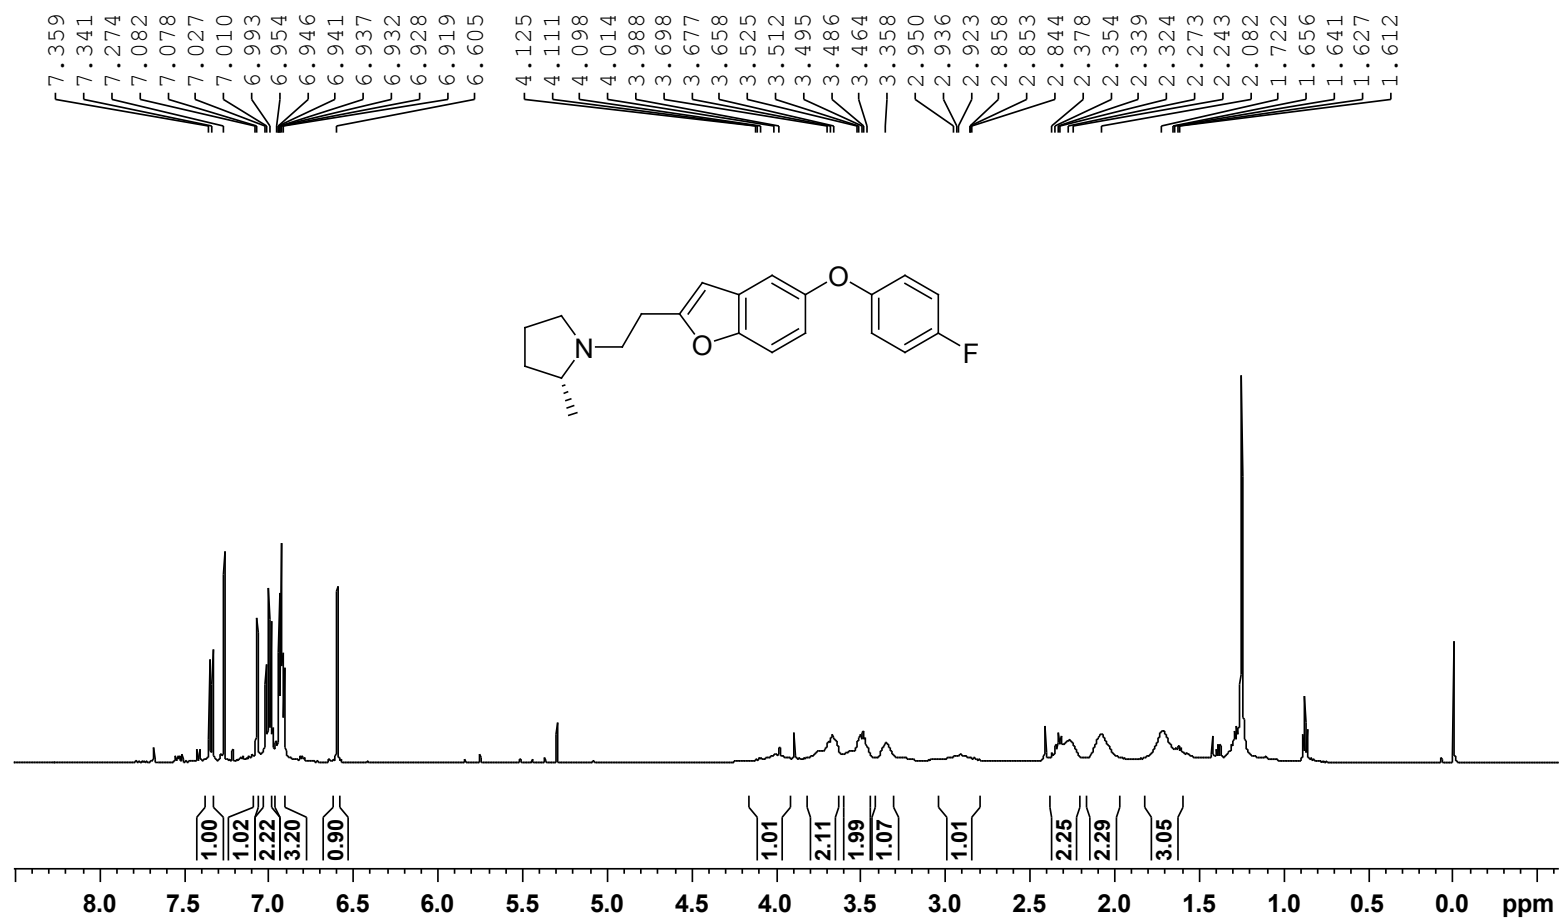

Figure 81. <sup>1</sup>H NMR (500MHz, CDCl<sub>3</sub>) of **5E**

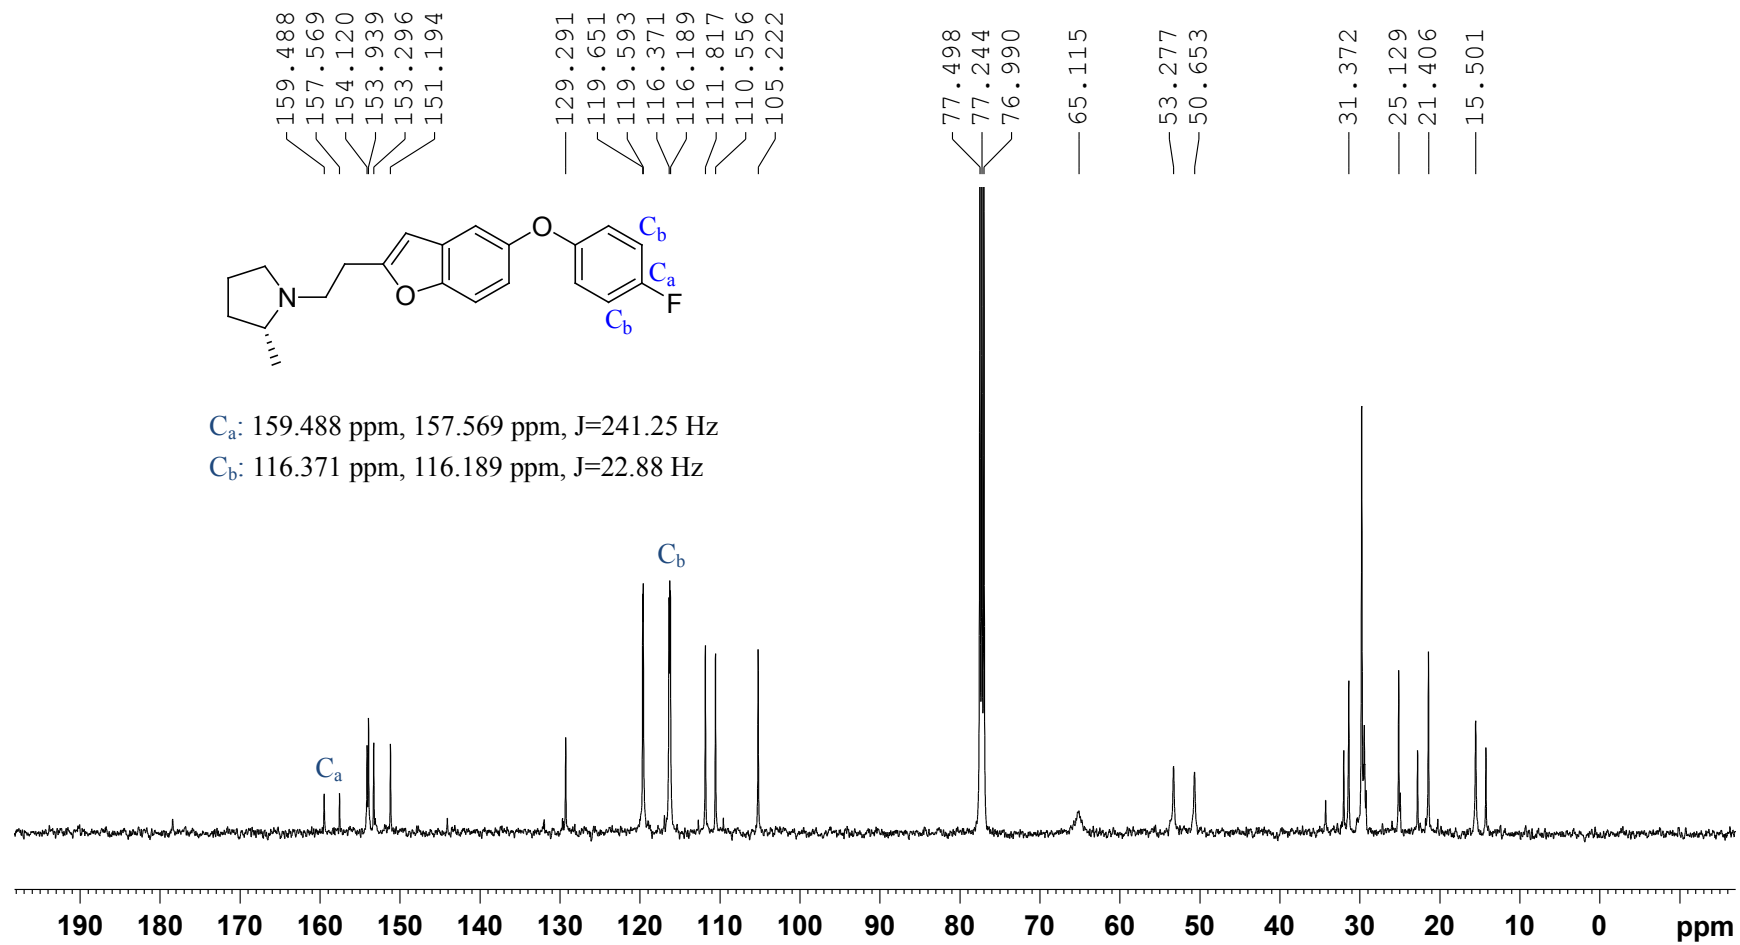

Figure 82.  $^{13}\text{C}$  NMR (125MHz,  $\text{CDCl}_3$ ) of **5E**

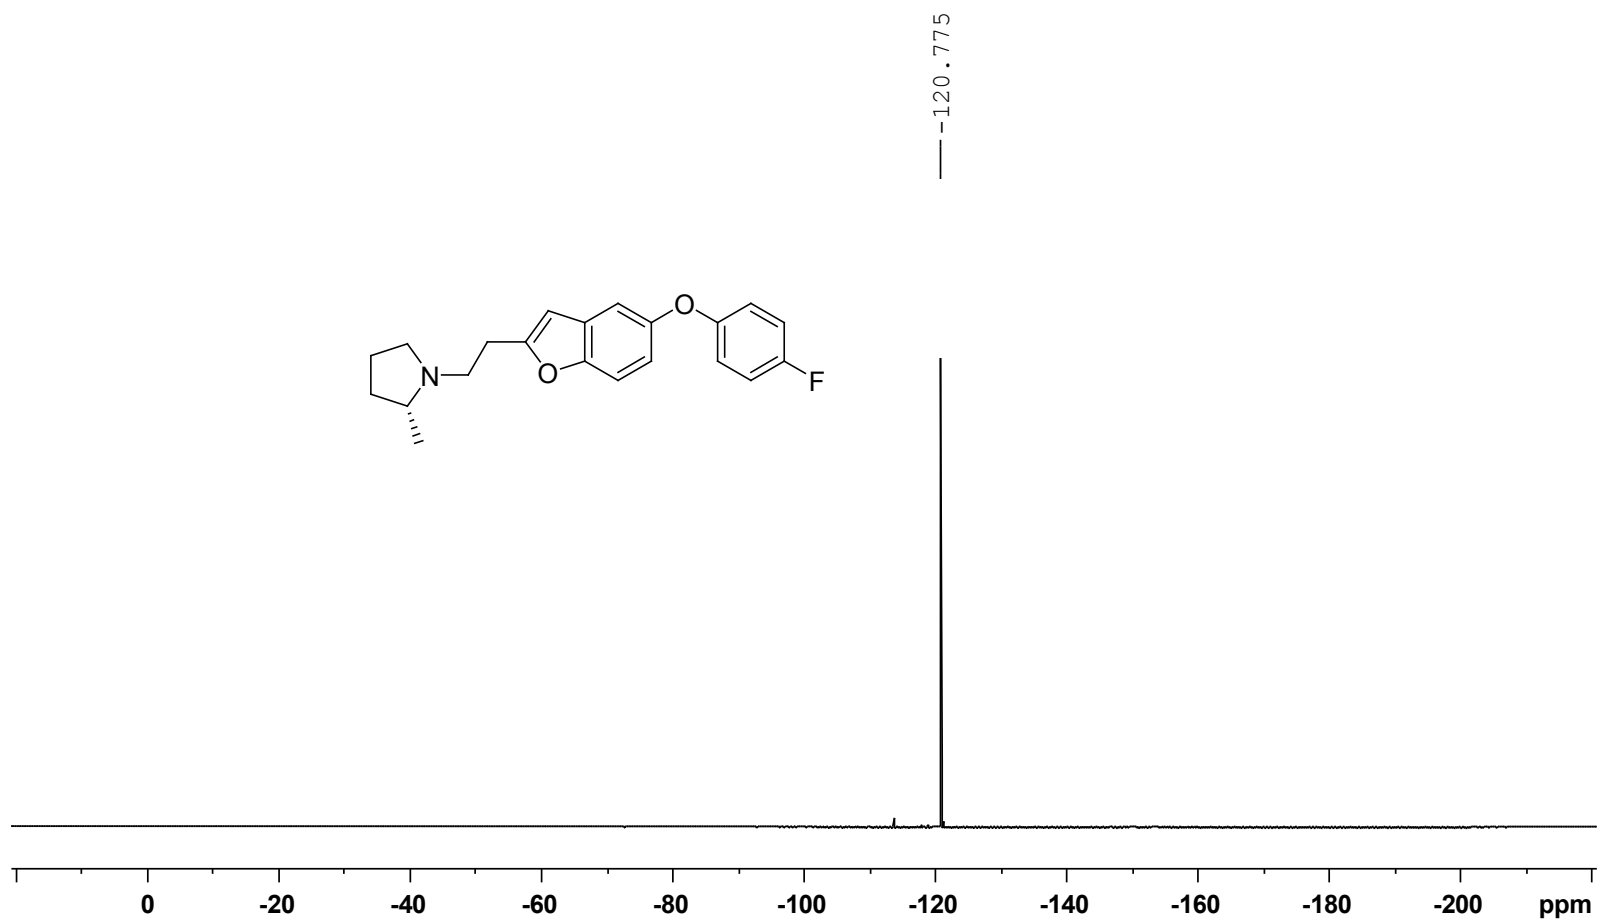

Figure 83.  $^{19}\text{F}$  NMR (470MHz,  $\text{CDCl}_3$ ) of **5E**

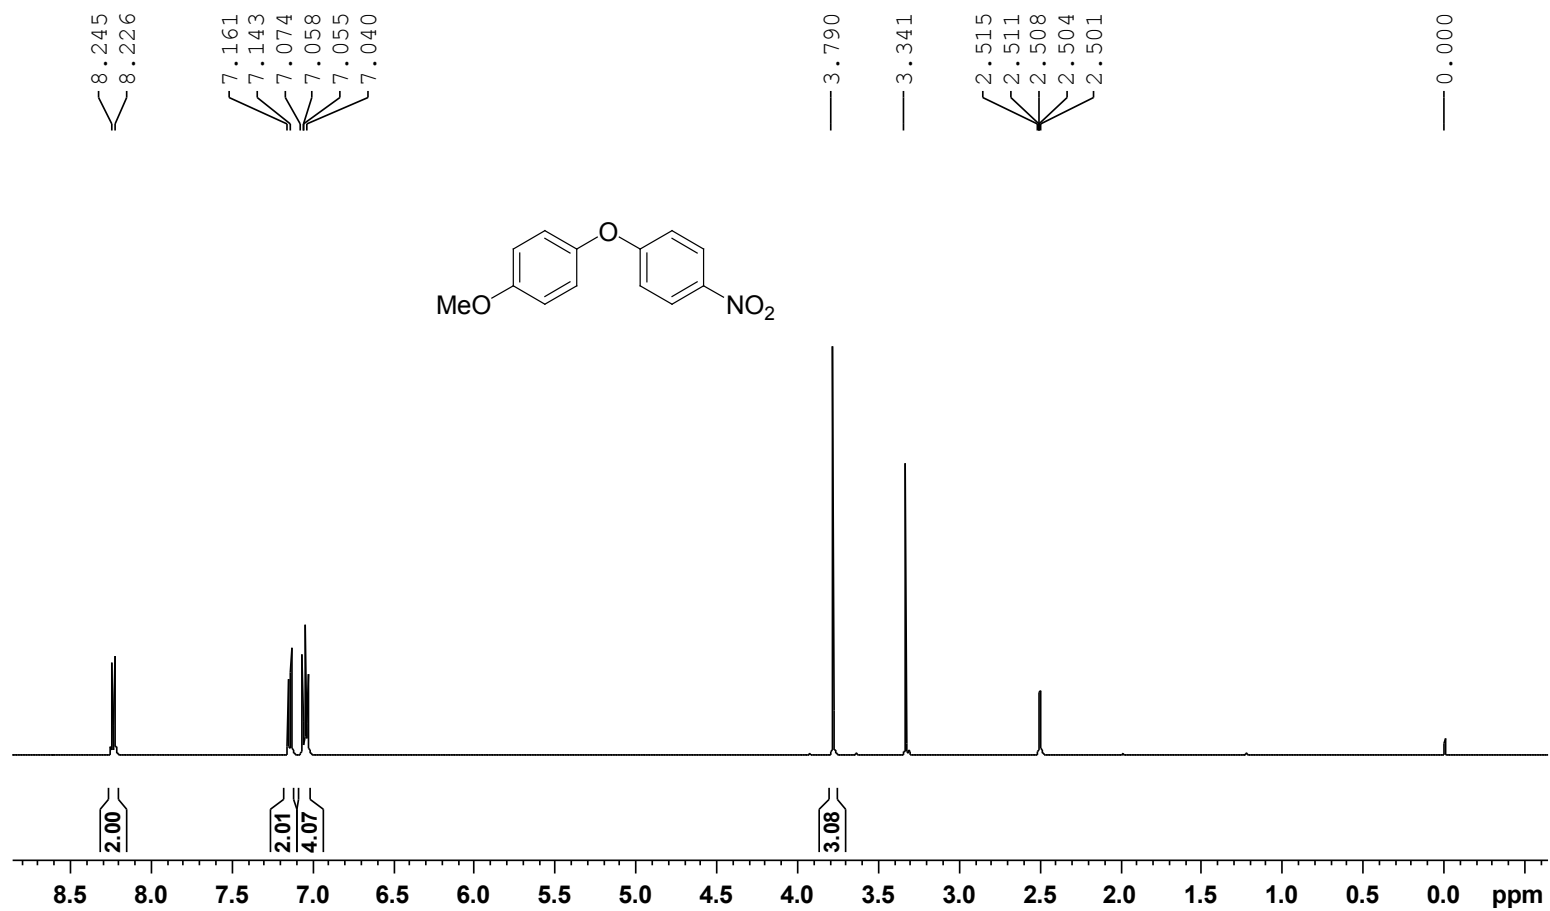

Figure 84. <sup>1</sup>H NMR (500MHz, CDCl<sub>3</sub>) of **2F**



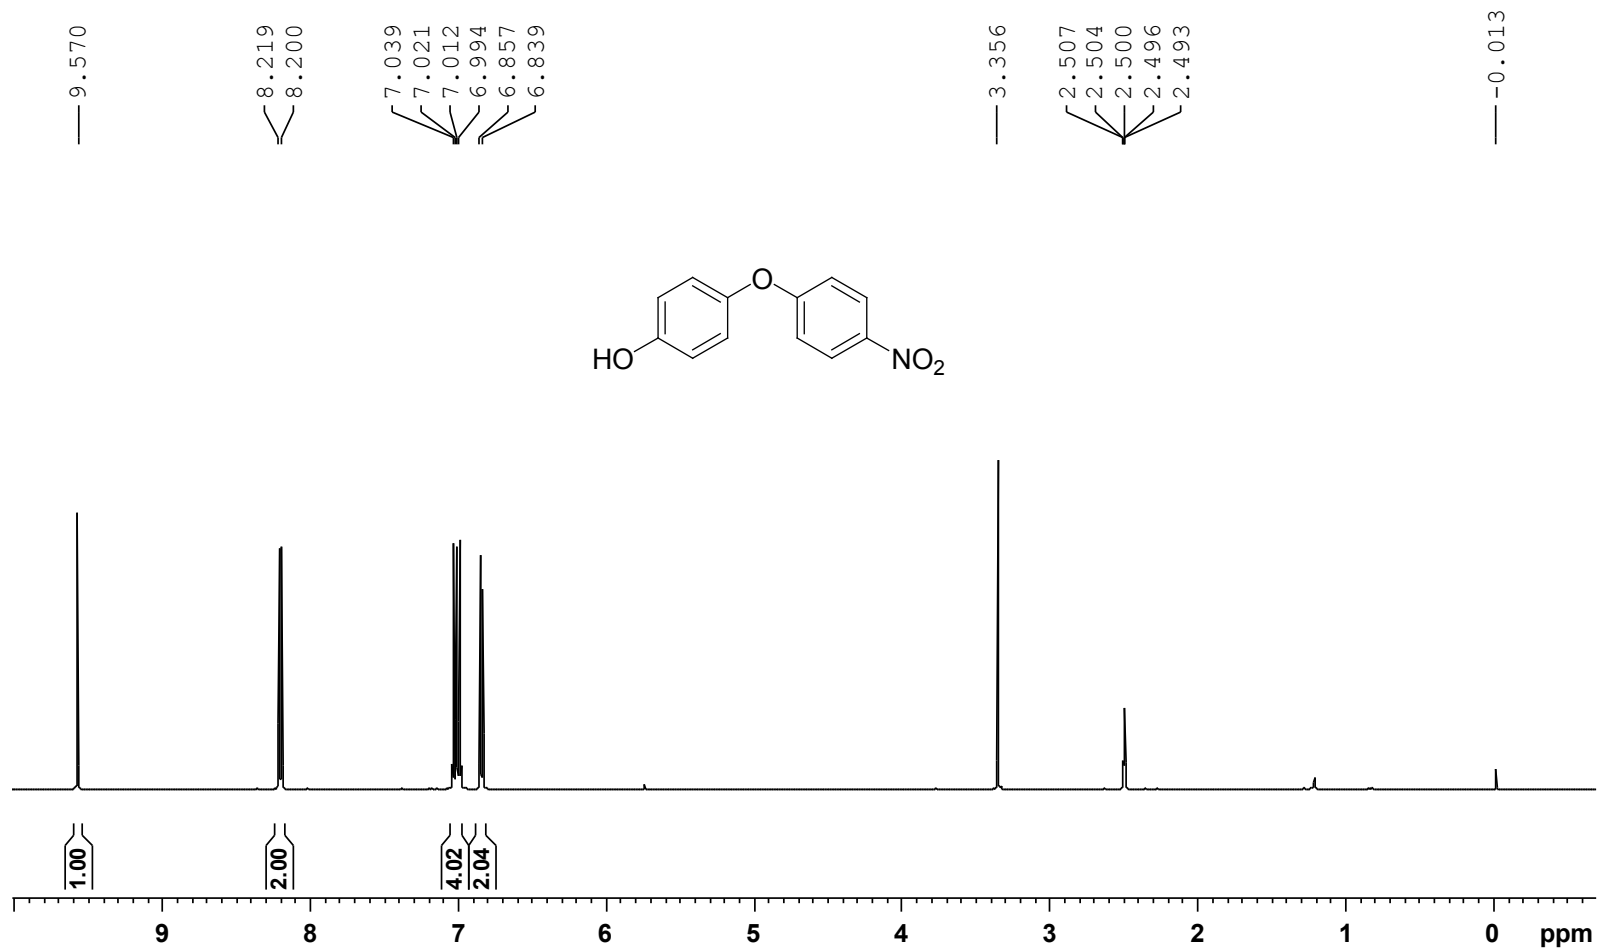

Figure 85. <sup>1</sup>H NMR (500MHz, CDCl<sub>3</sub>) of **3F**

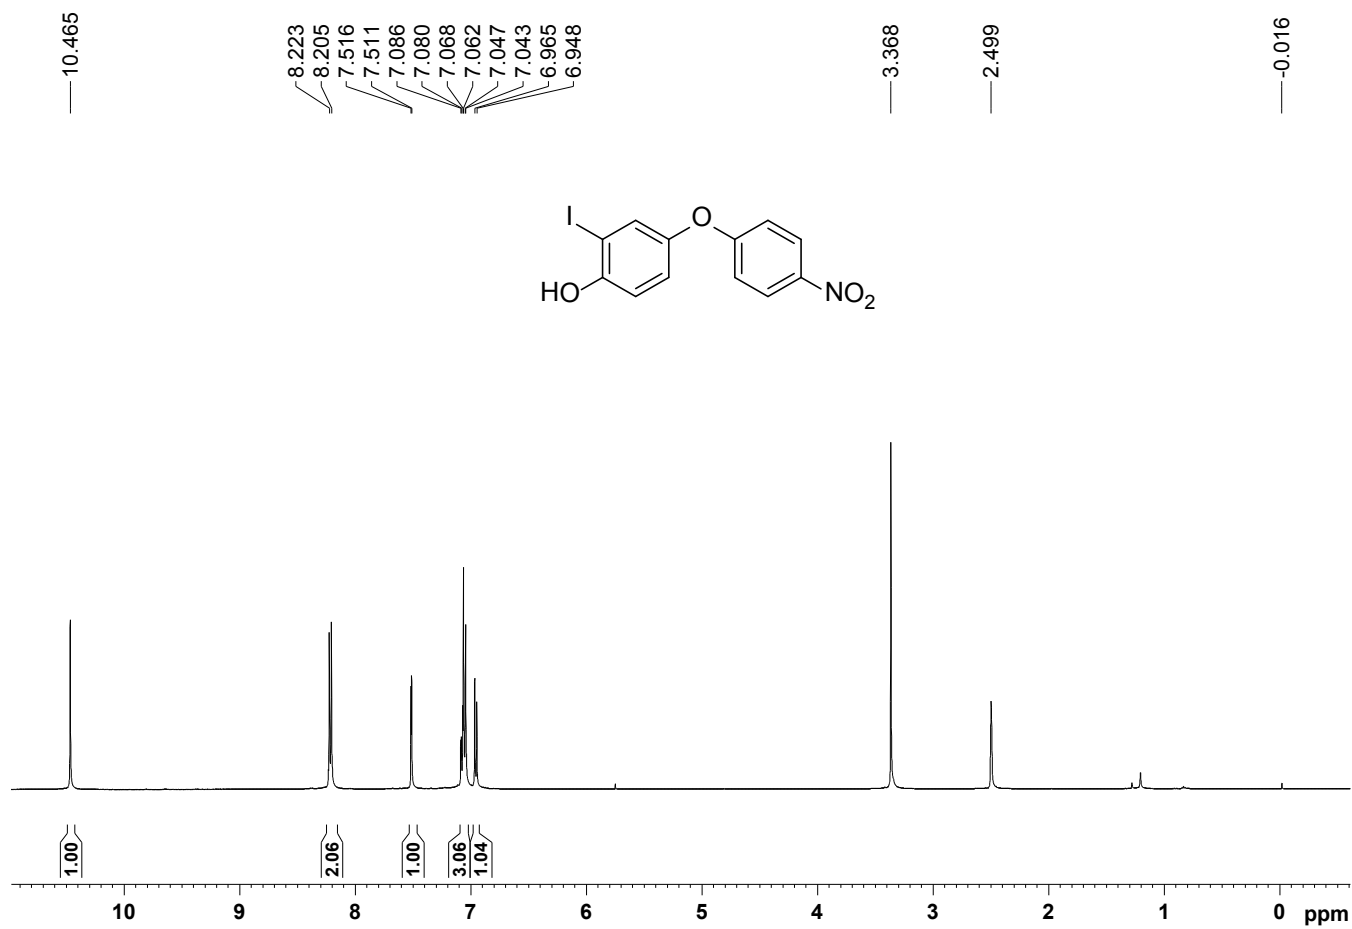

Figure 86. <sup>1</sup>H NMR (500MHz, DMSO-d<sub>6</sub>) of 4F.

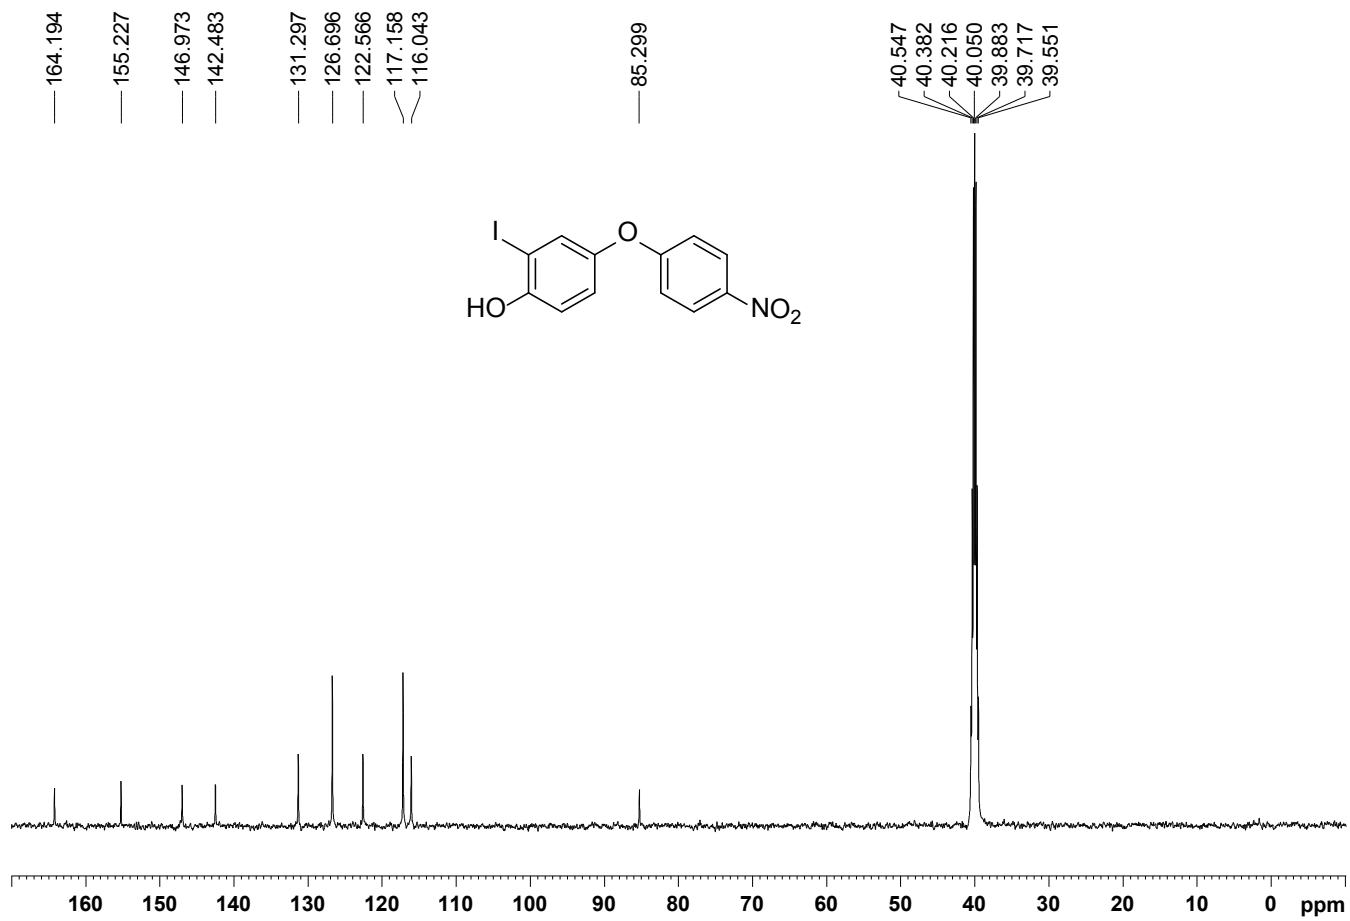

Figure 87. <sup>13</sup>C NMR (125MHz, DMSO-d<sub>6</sub>) of **4F**.

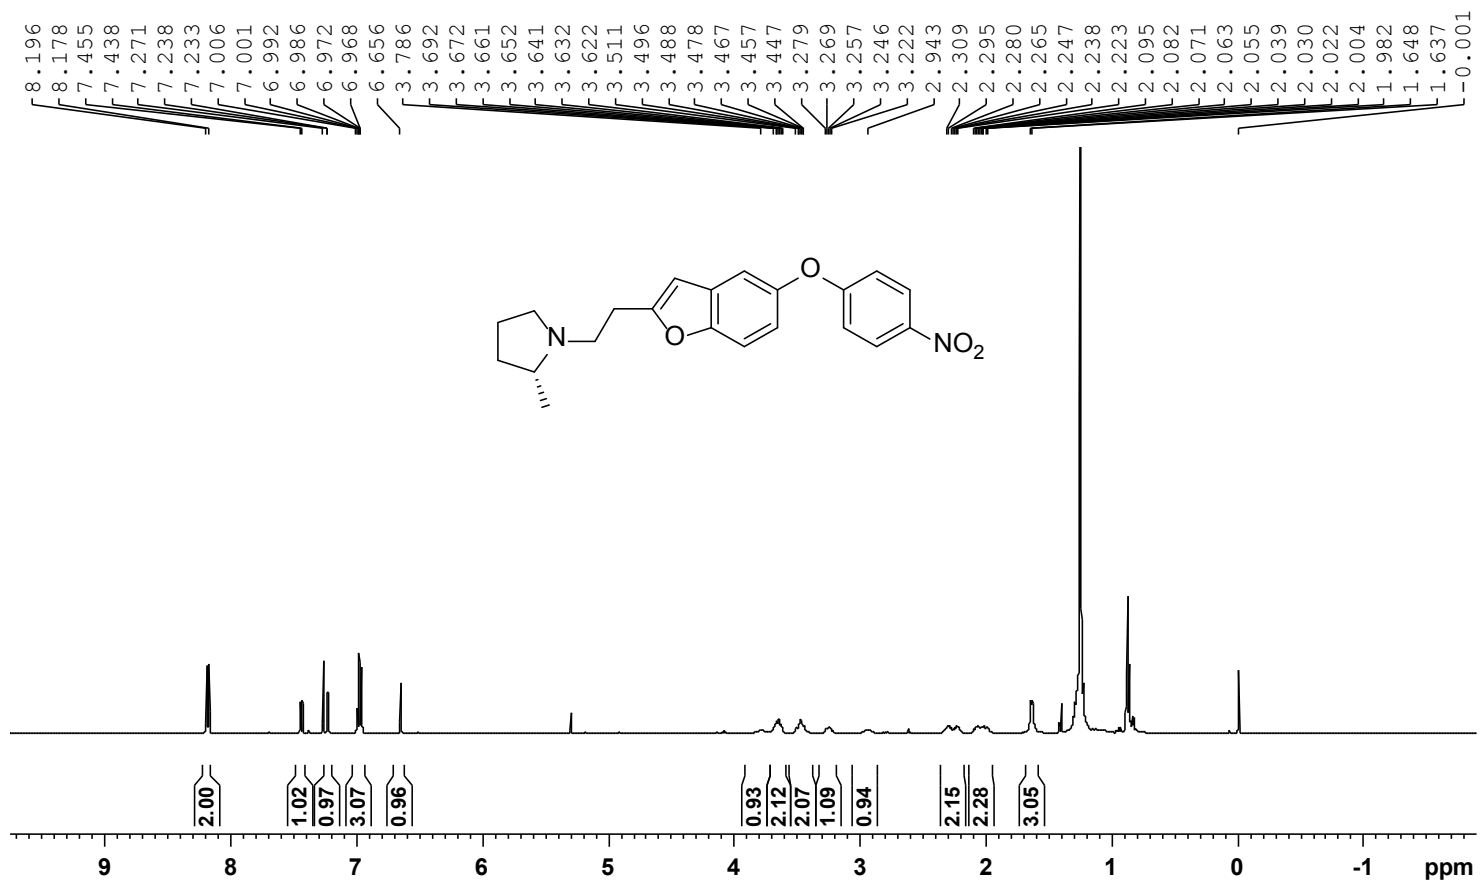

Figure 88. <sup>1</sup>H NMR (500MHz, CDCl<sub>3</sub>) of **5F**.

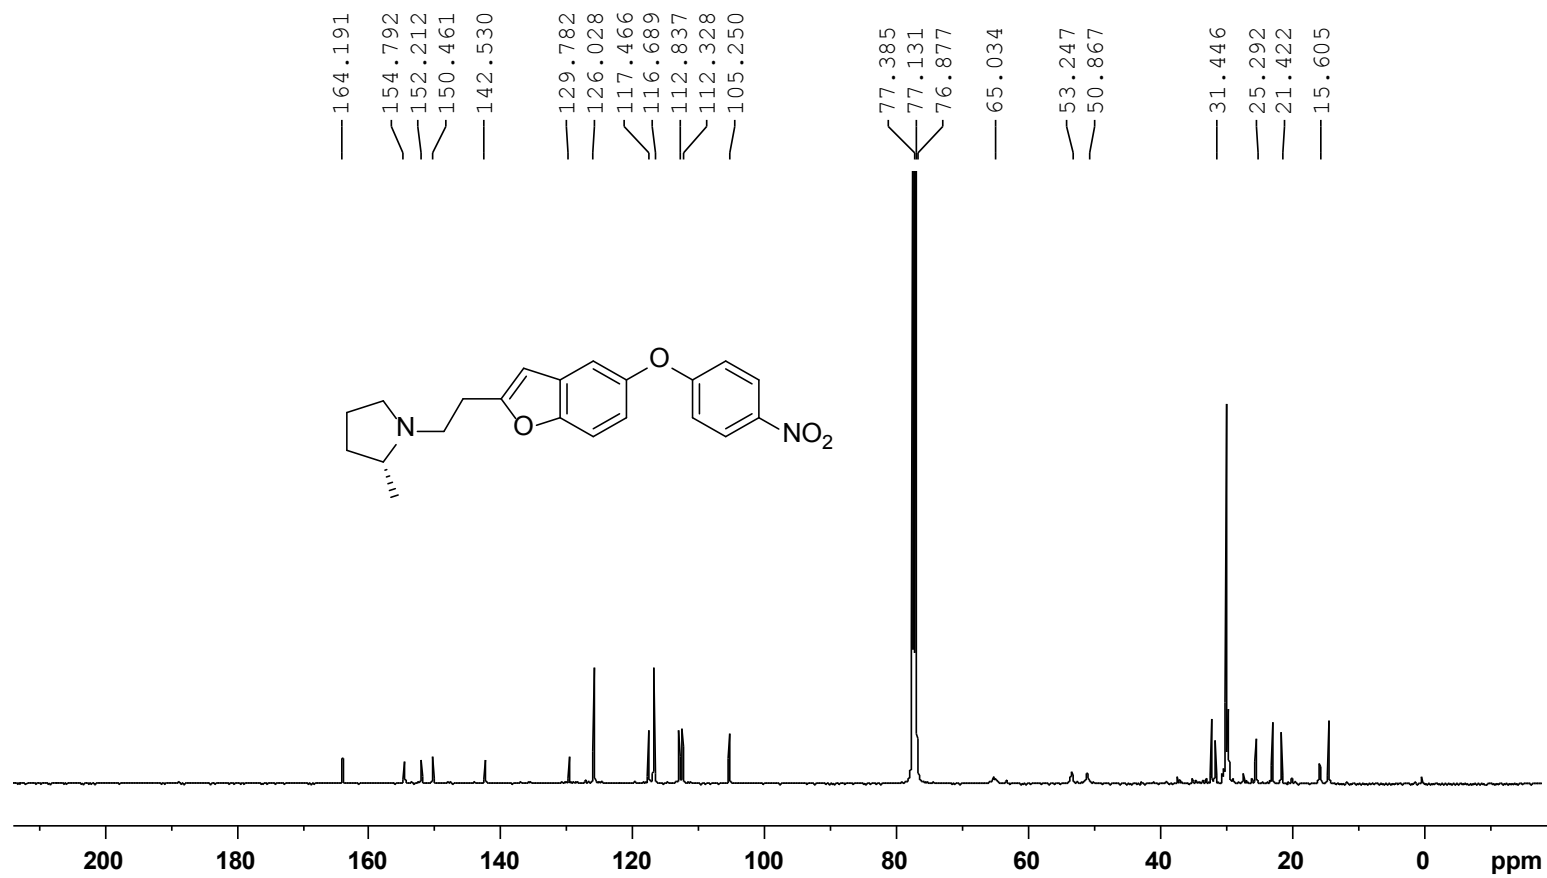

Figure 89. <sup>13</sup>C NMR (125MHz, CDCl<sub>3</sub>) of **5F**

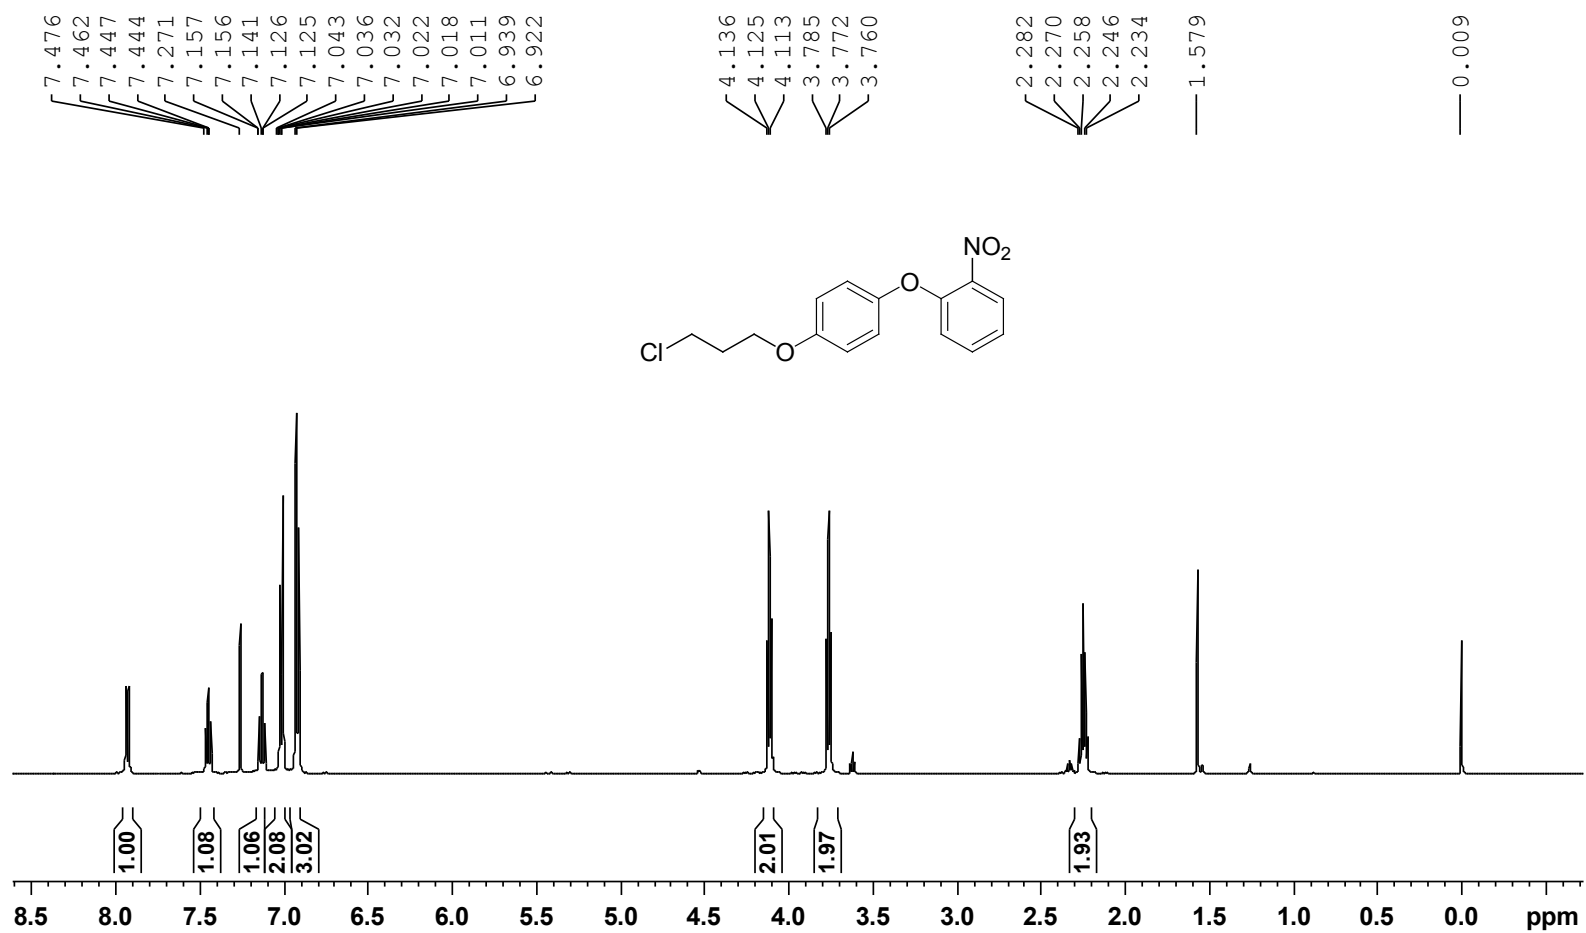

Figure 90. <sup>1</sup>H NMR (500MHz, CDCl<sub>3</sub>) of **6B**

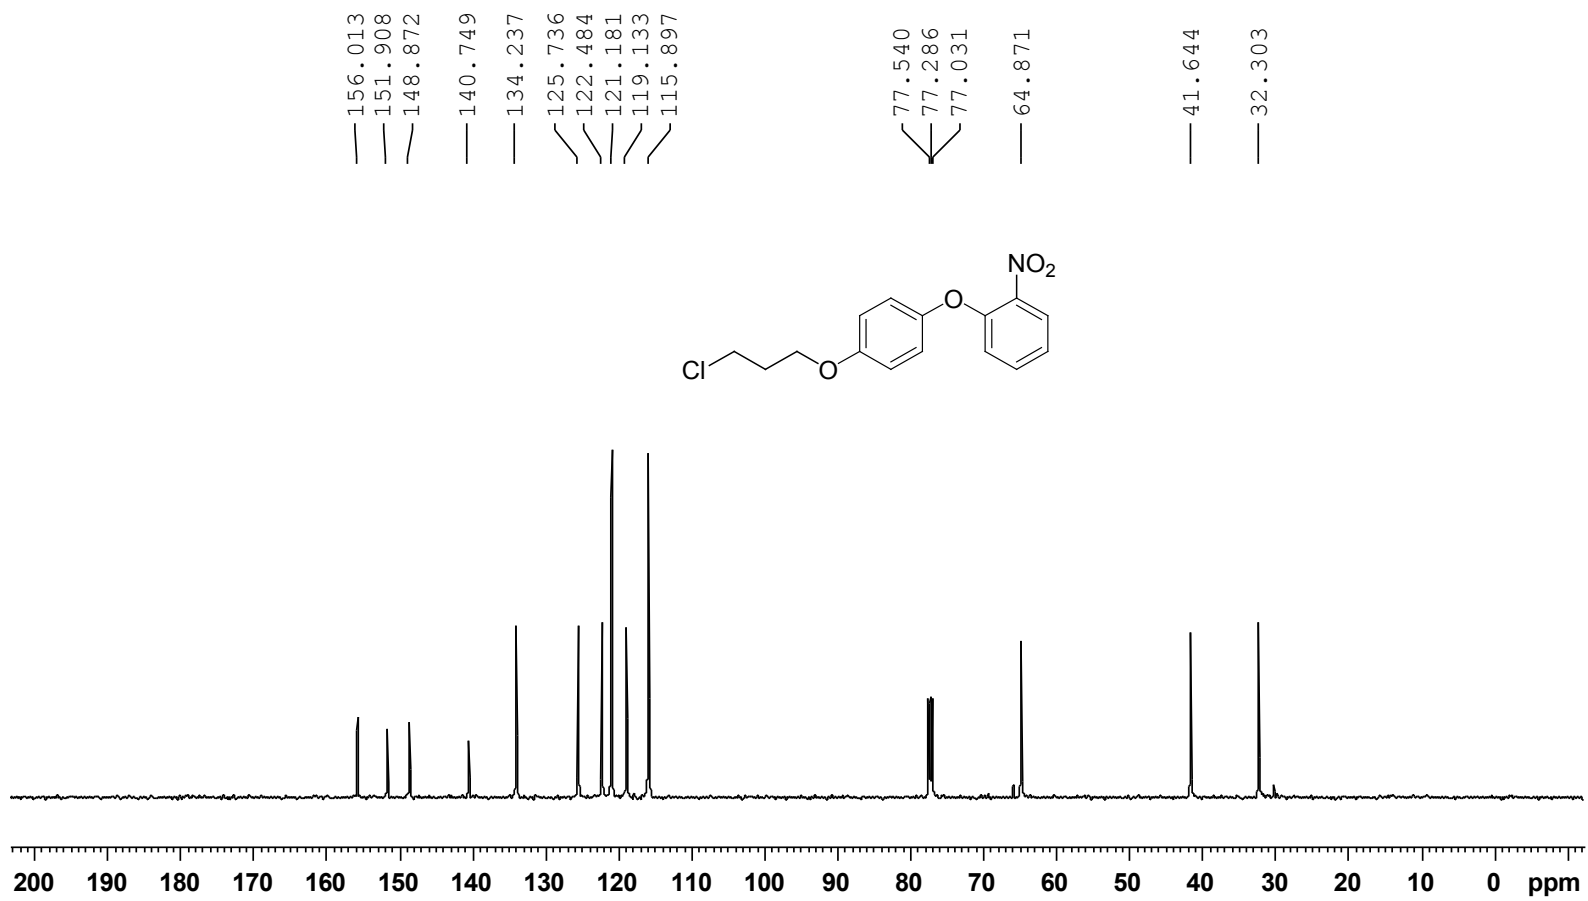

Figure 91.  $^{13}\text{C}$  NMR (125MHz,  $\text{CDCl}_3$ ) of **6B**

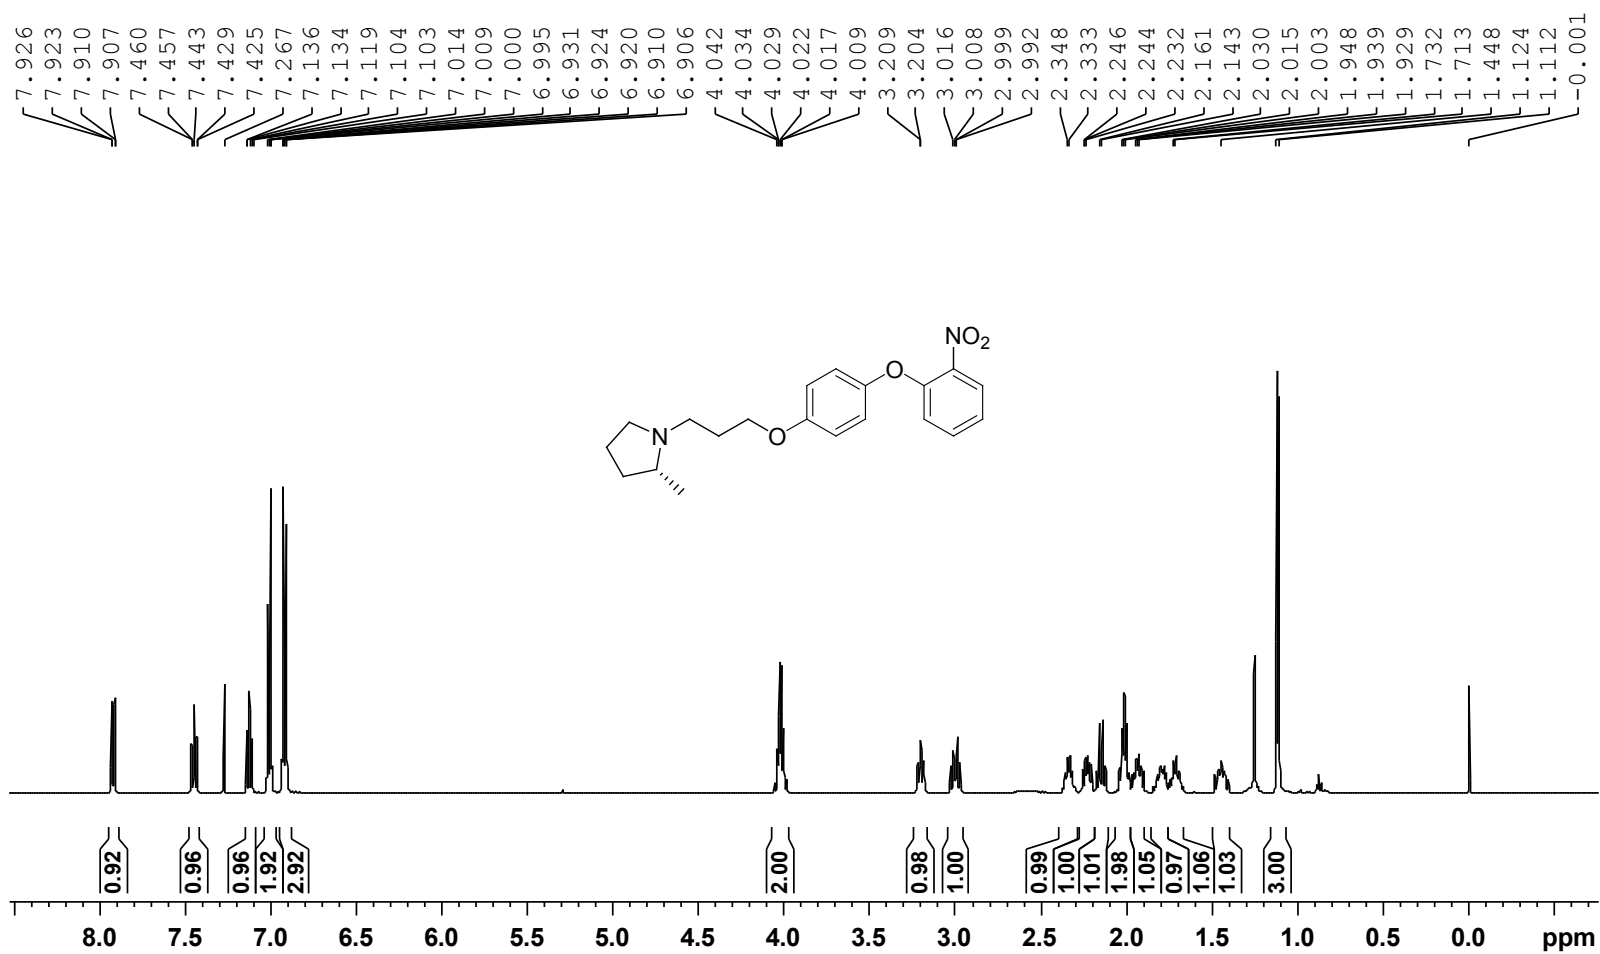

Figure 92. <sup>1</sup>H NMR (500MHz, CDCl<sub>3</sub>) of 7B



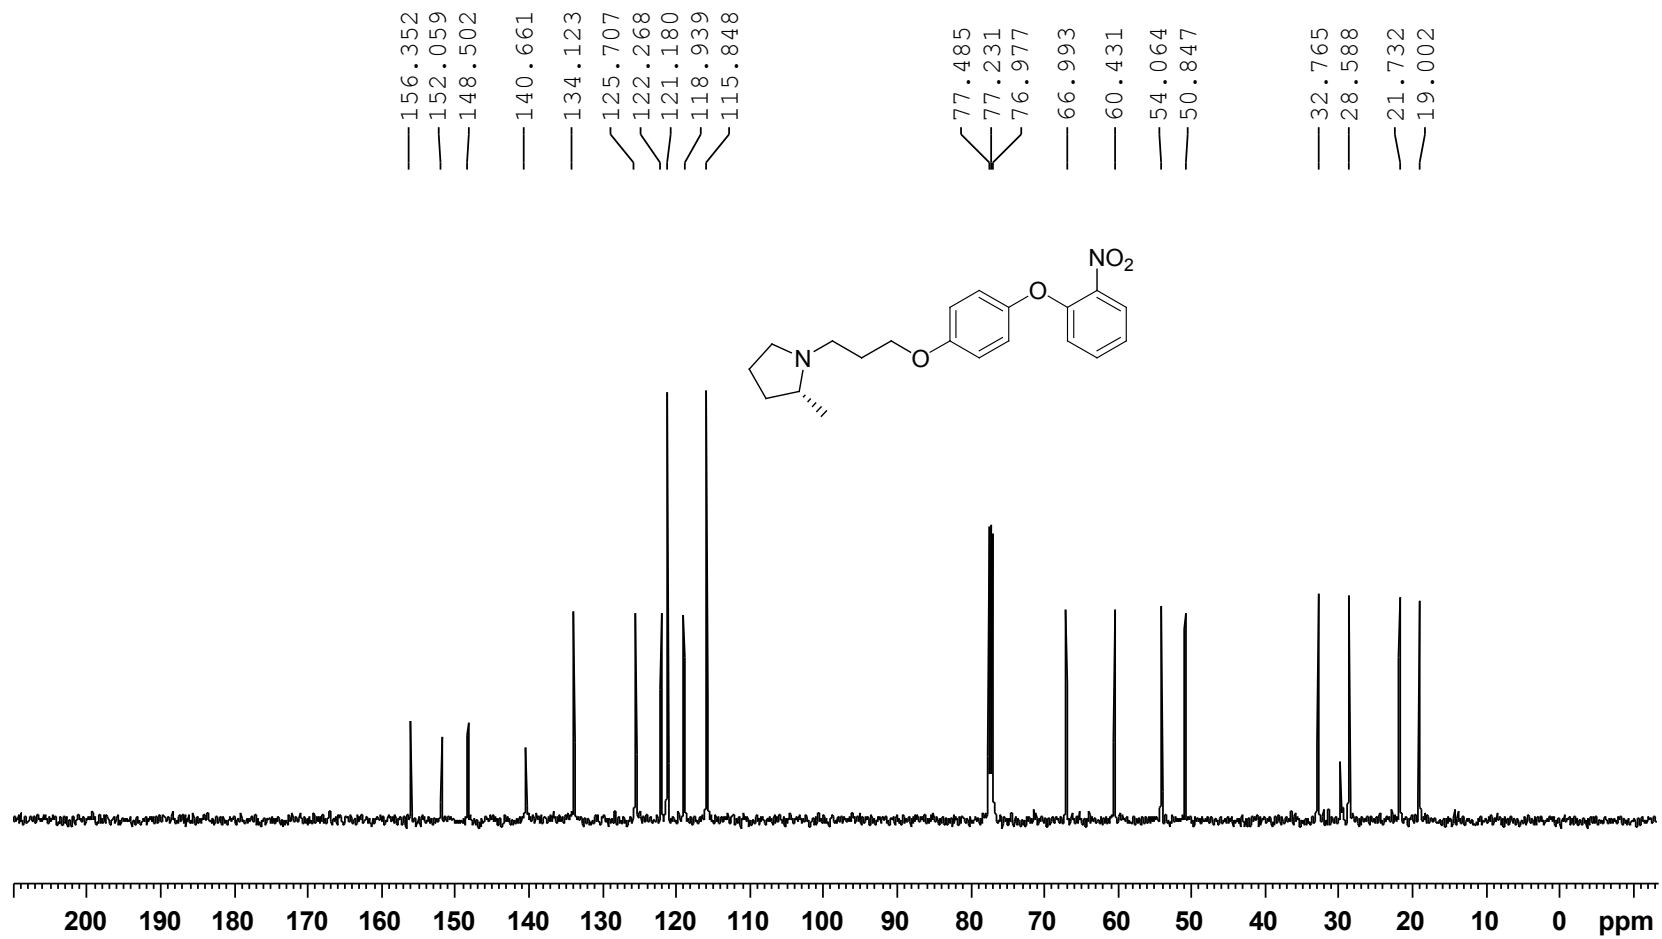

Figure 93. <sup>13</sup>C NMR (125MHz, CDCl<sub>3</sub>) of 7B

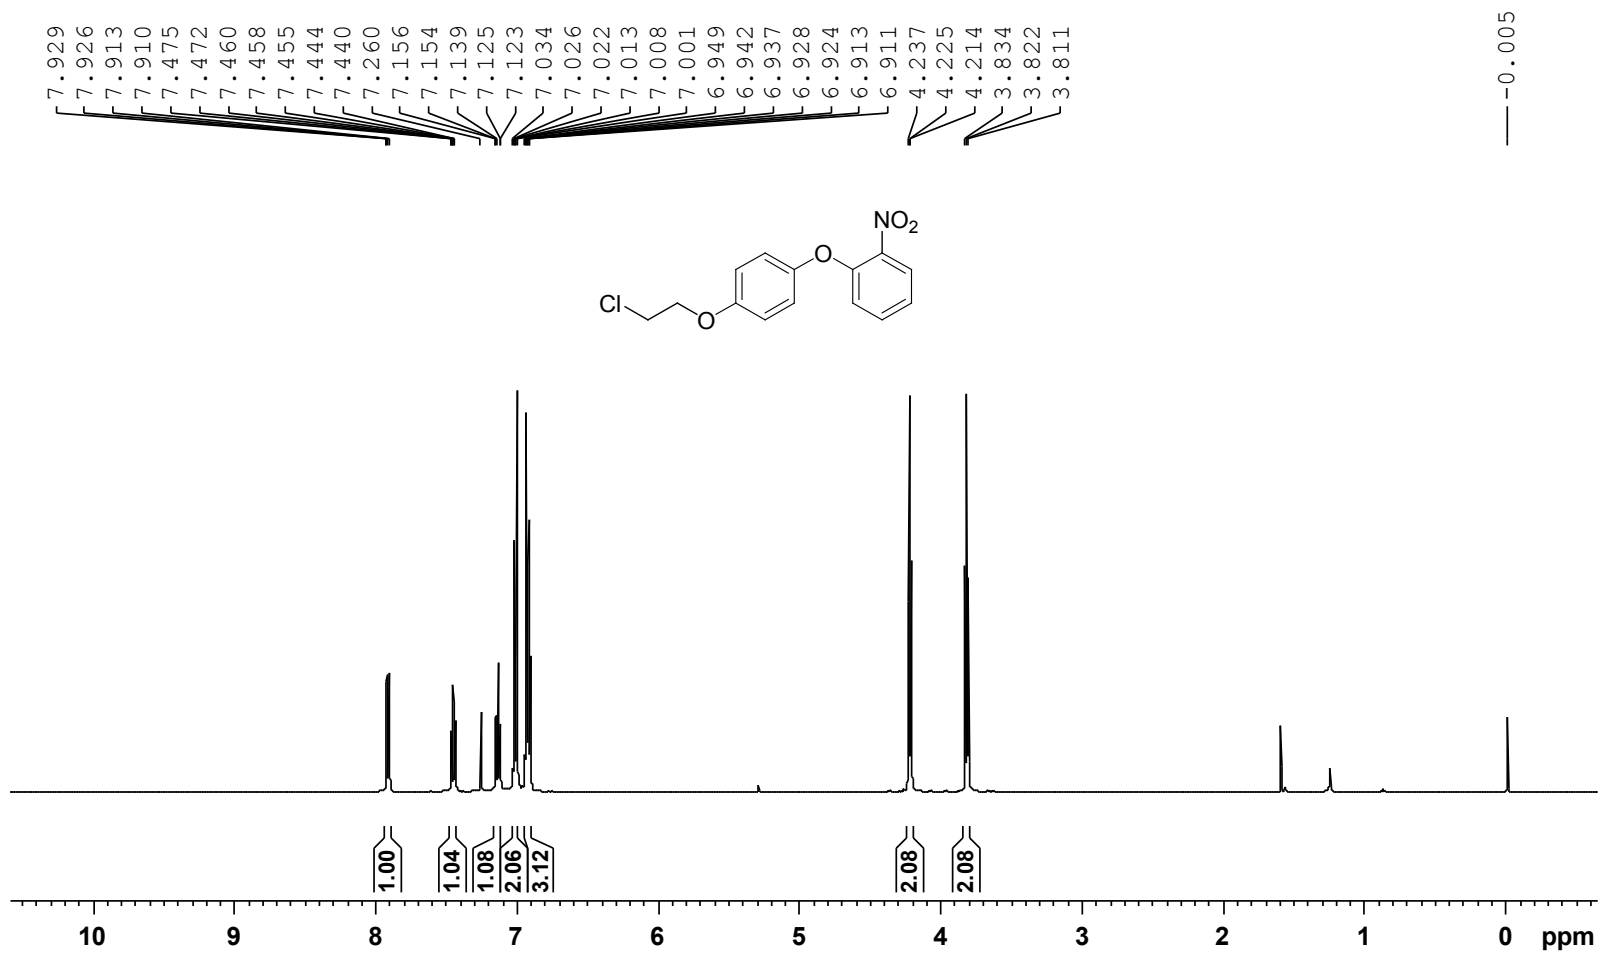

Figure 94. <sup>1</sup>H NMR (500MHz, CDCl<sub>3</sub>) of **6B'**

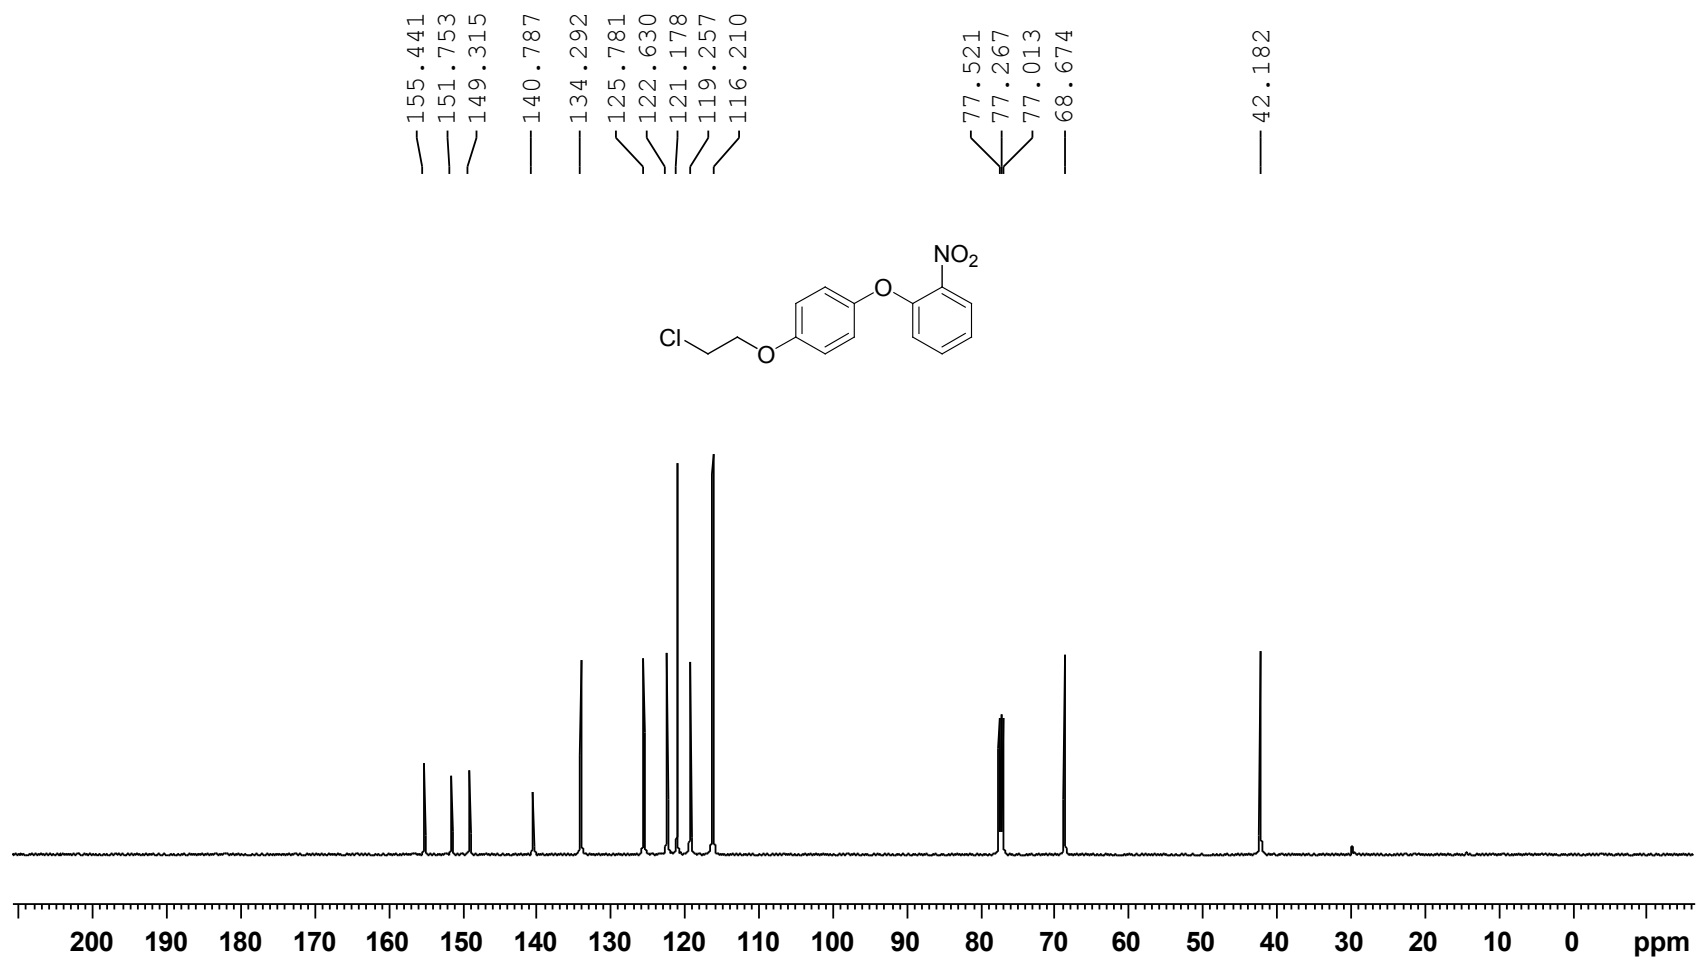

Figure 95.  $^{13}\text{C}$  NMR (125MHz,  $\text{CDCl}_3$ ) of **6B'**

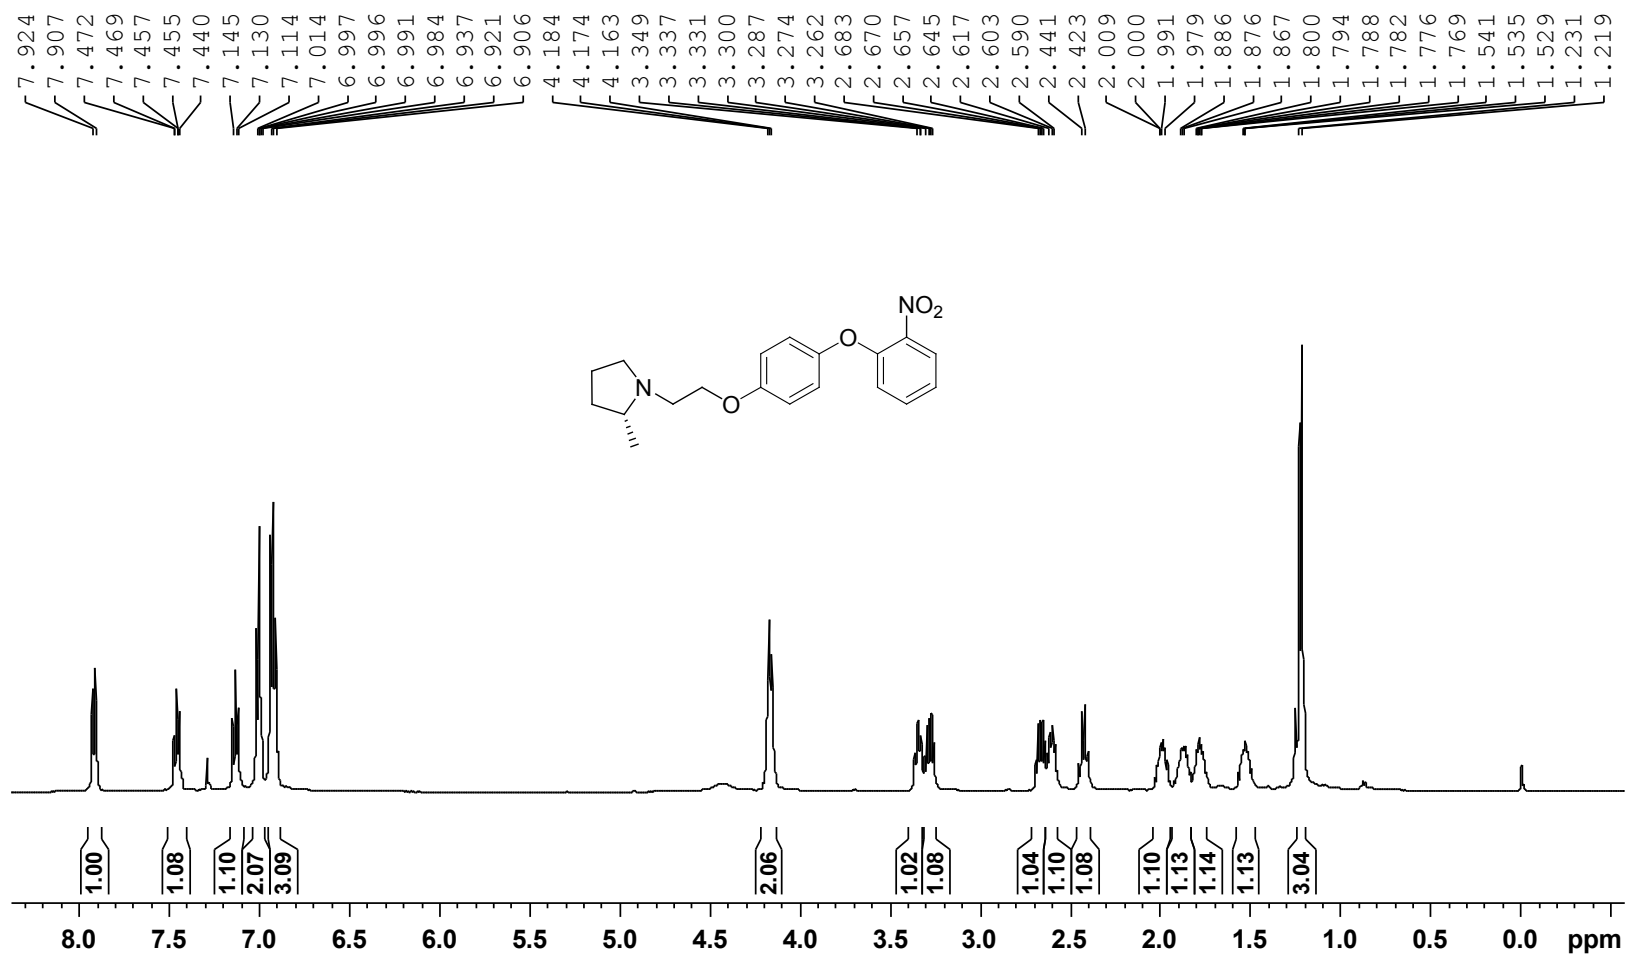

Figure 96. <sup>1</sup>H NMR (500MHz, CDCl<sub>3</sub>) of 7B'

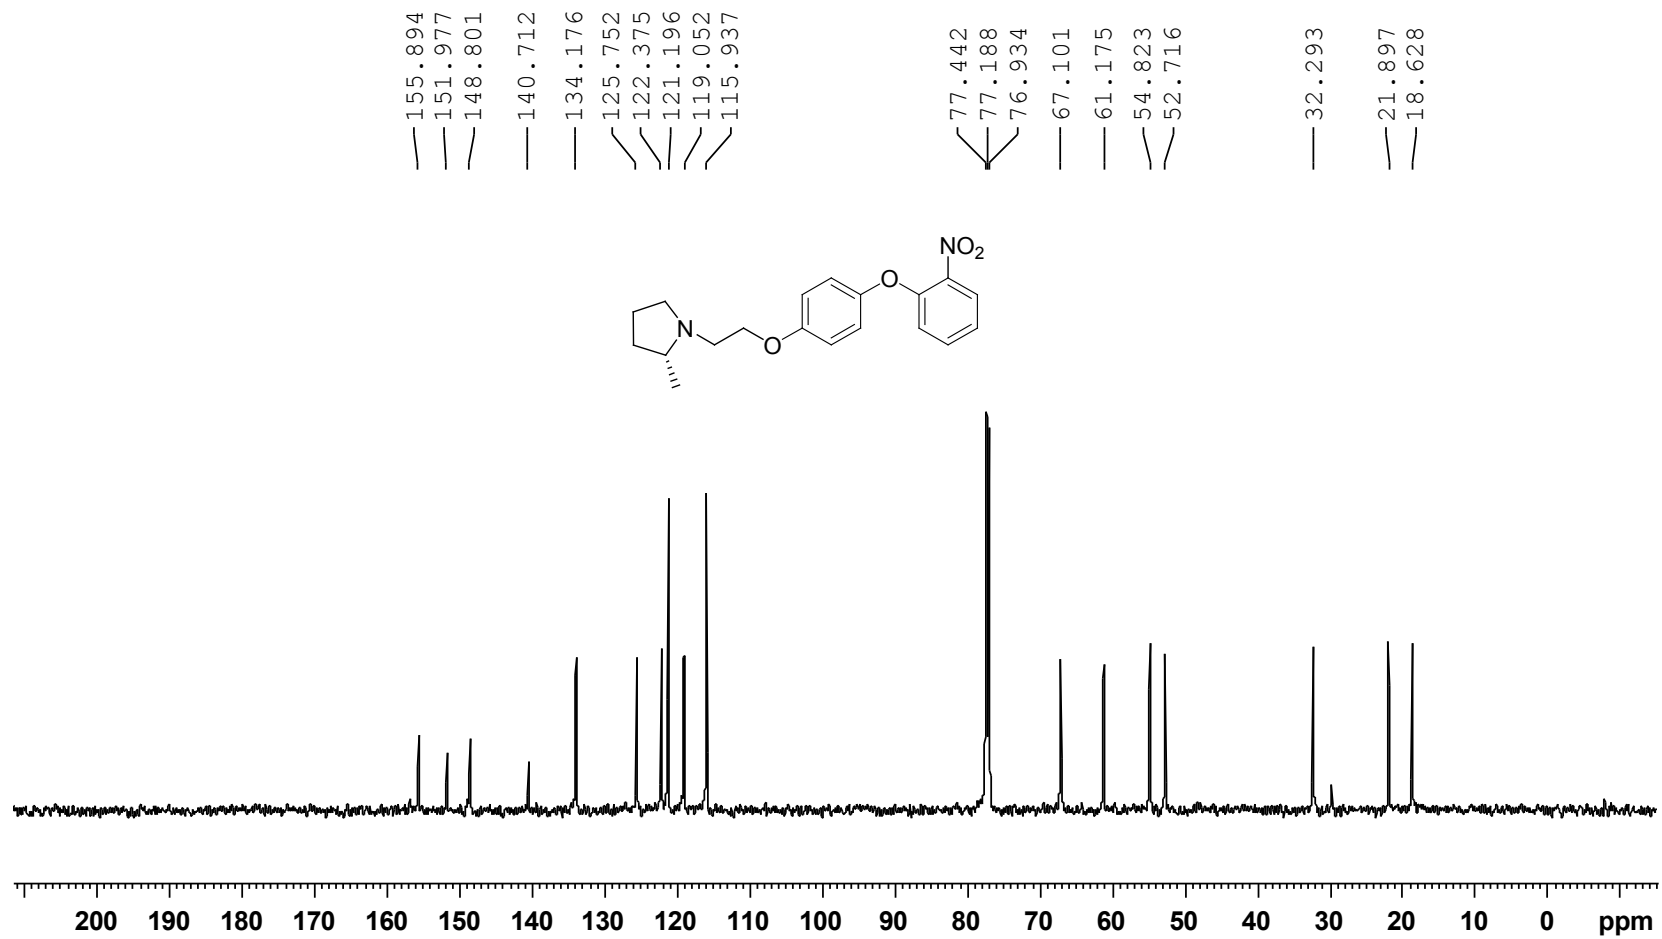

Figure 97. <sup>13</sup>C NMR (125MHz, CDCL<sub>3</sub>) of 7B'

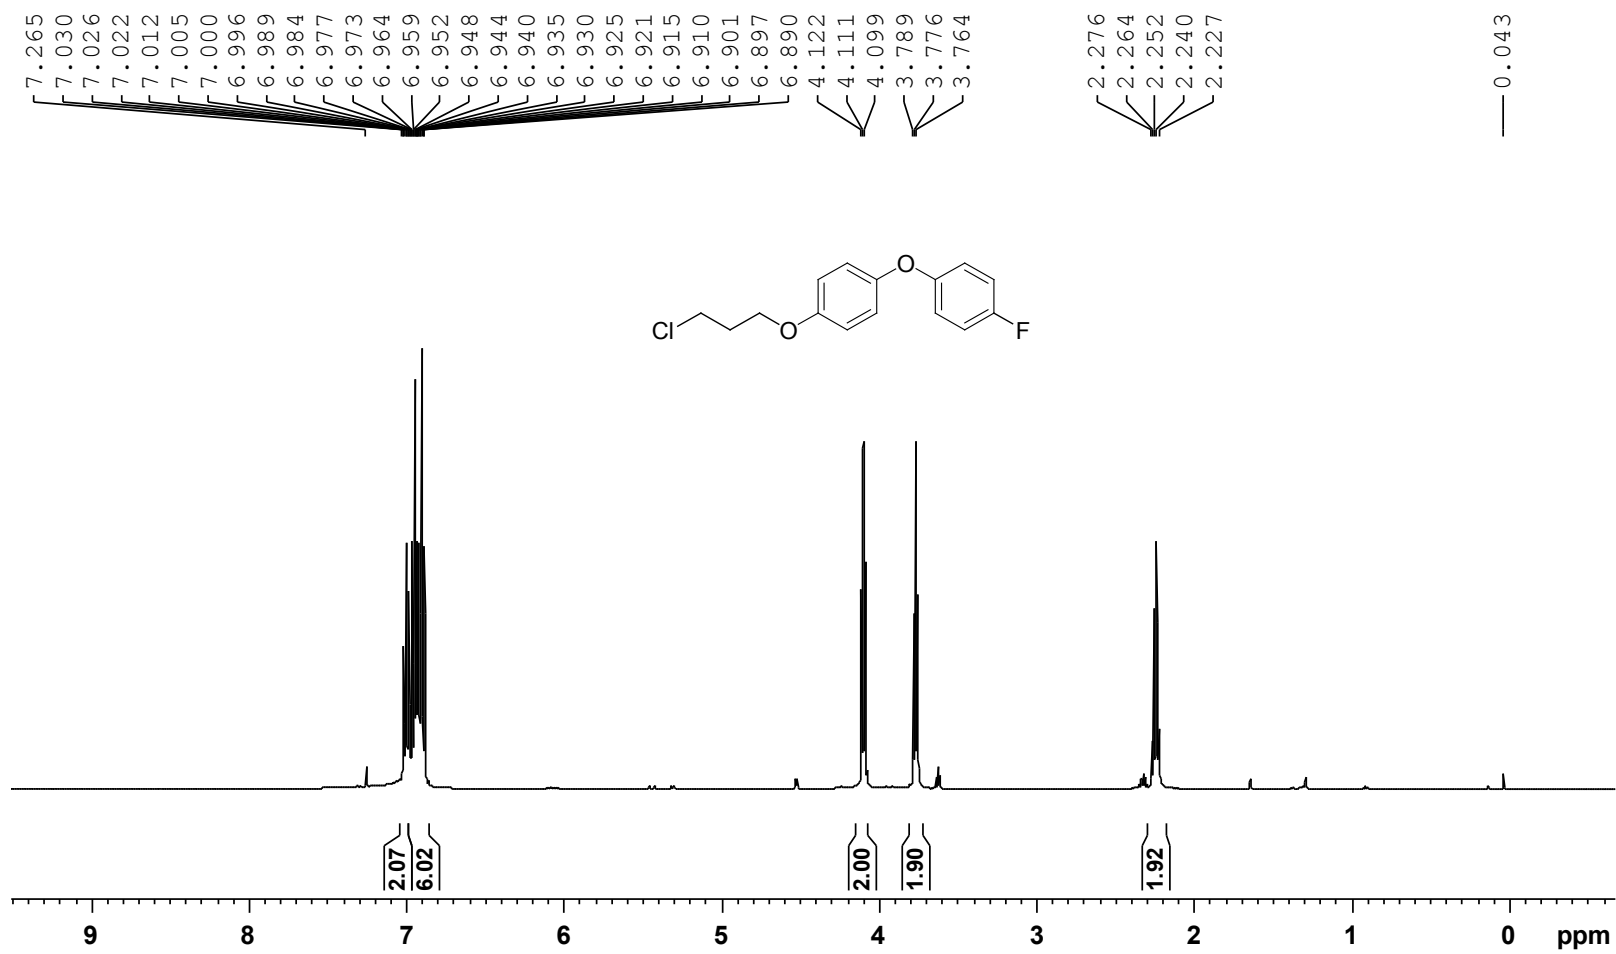

Figure 98. <sup>1</sup>H NMR (500MHz, CDCl<sub>3</sub>) of **6E**

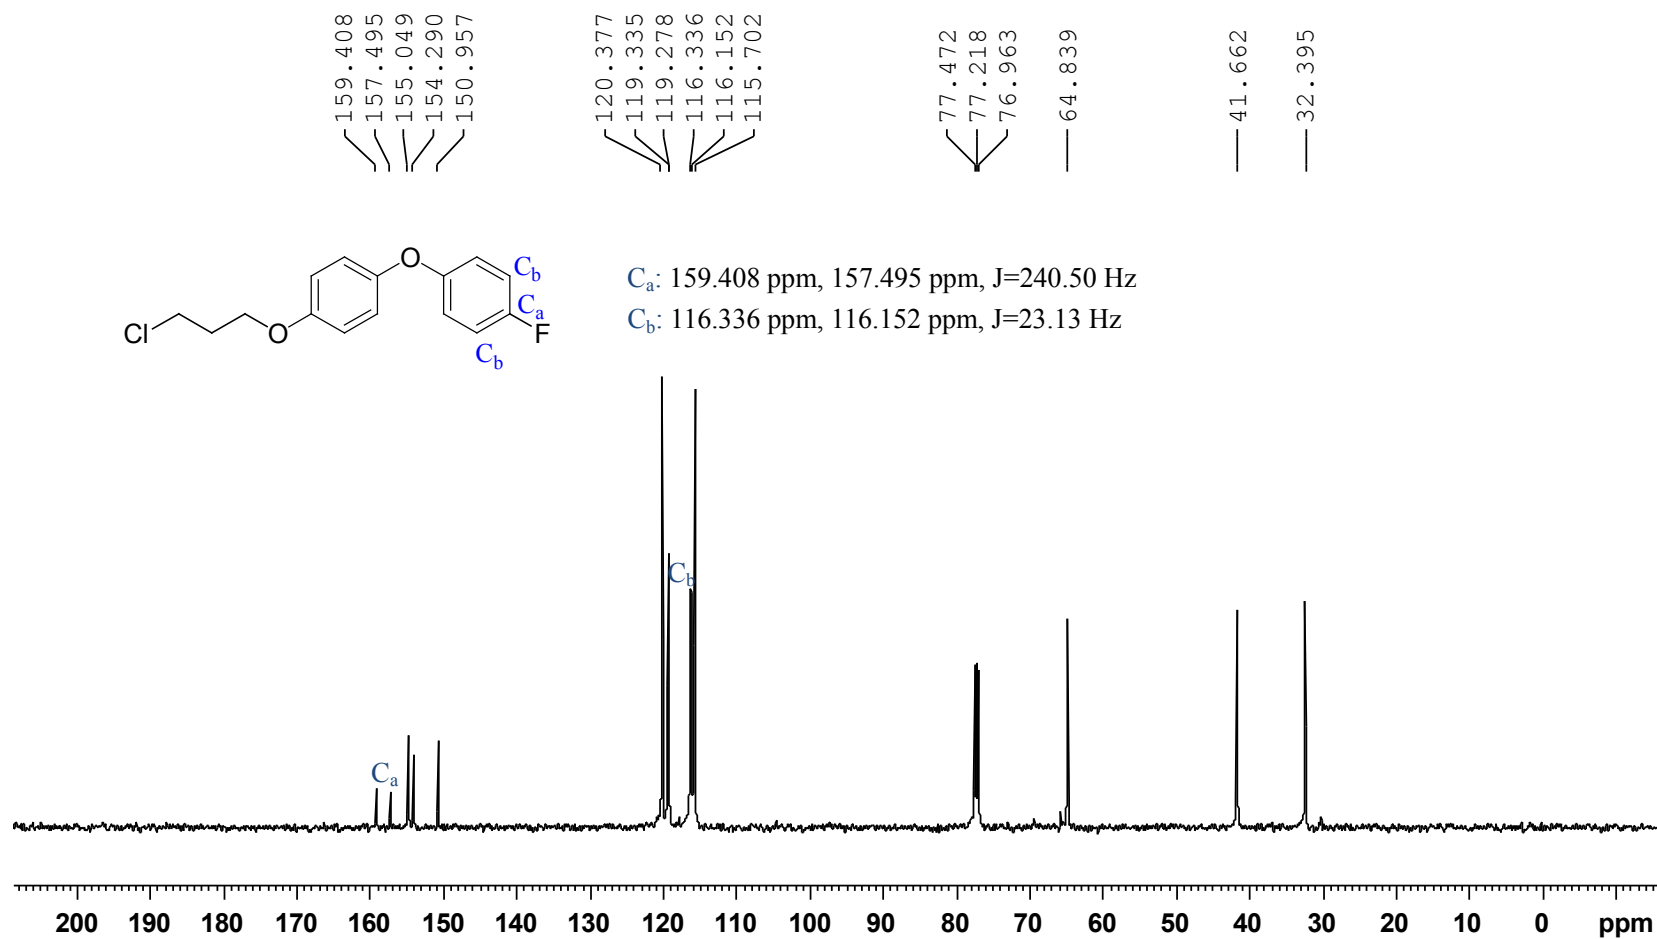

Figure 99.  $^{13}\text{C}$  NMR (125MHz,  $\text{CDCl}_3$ ) of **6E**

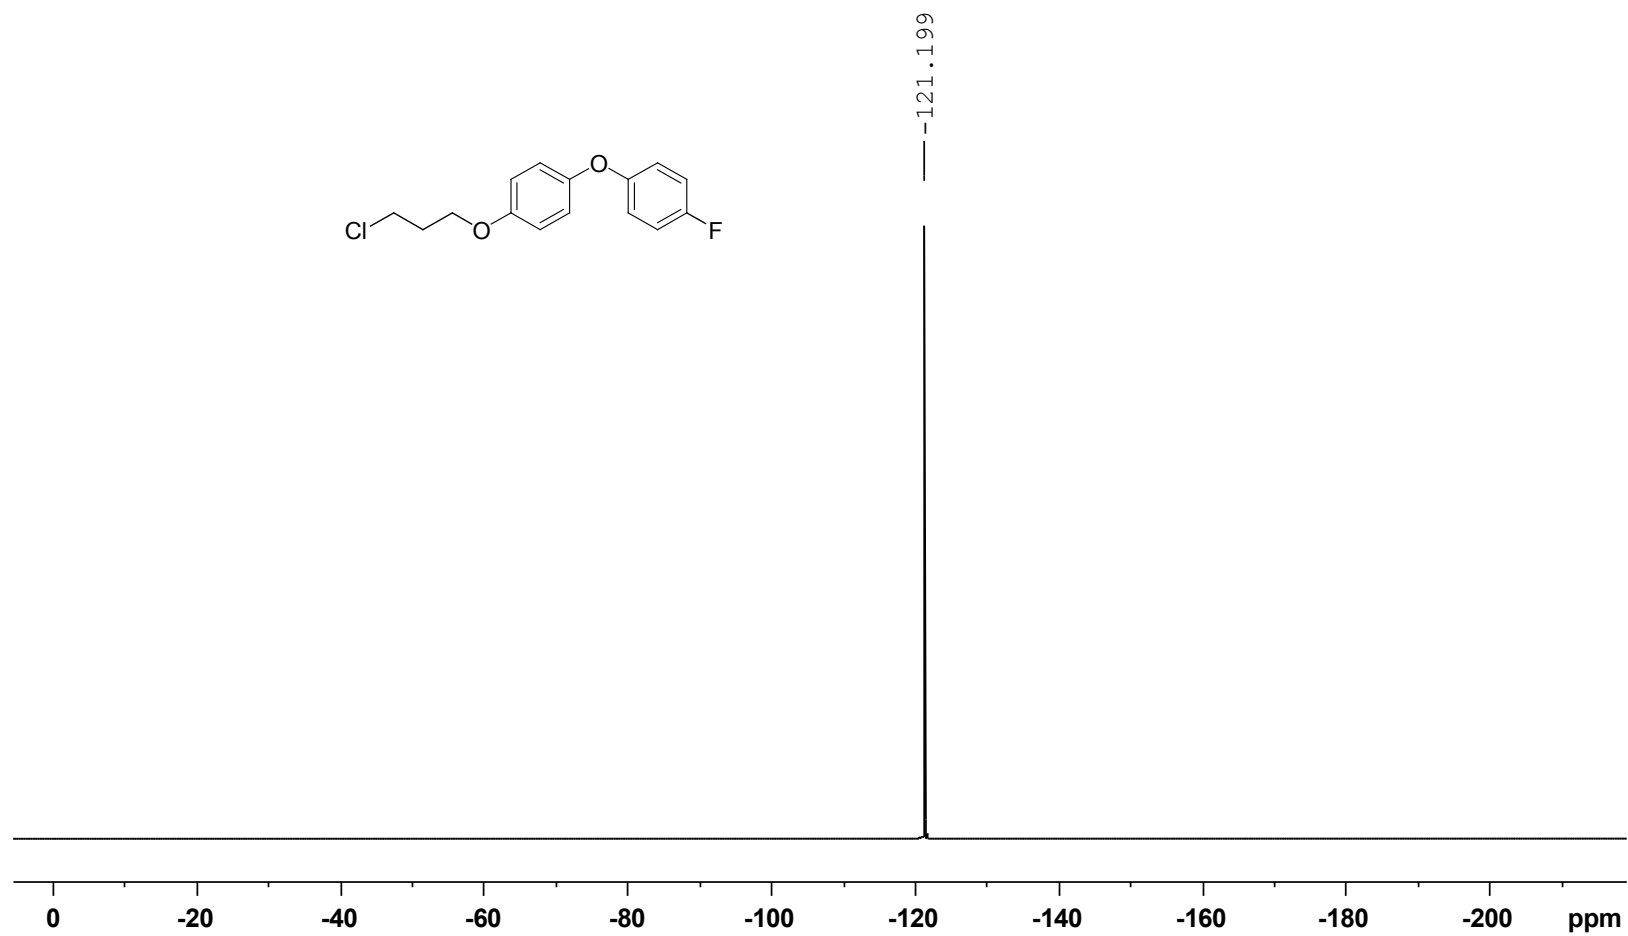

Figure 100.  $^{19}\text{F}$  NMR (470MHz,  $\text{CDCl}_3$ ) of **6E**



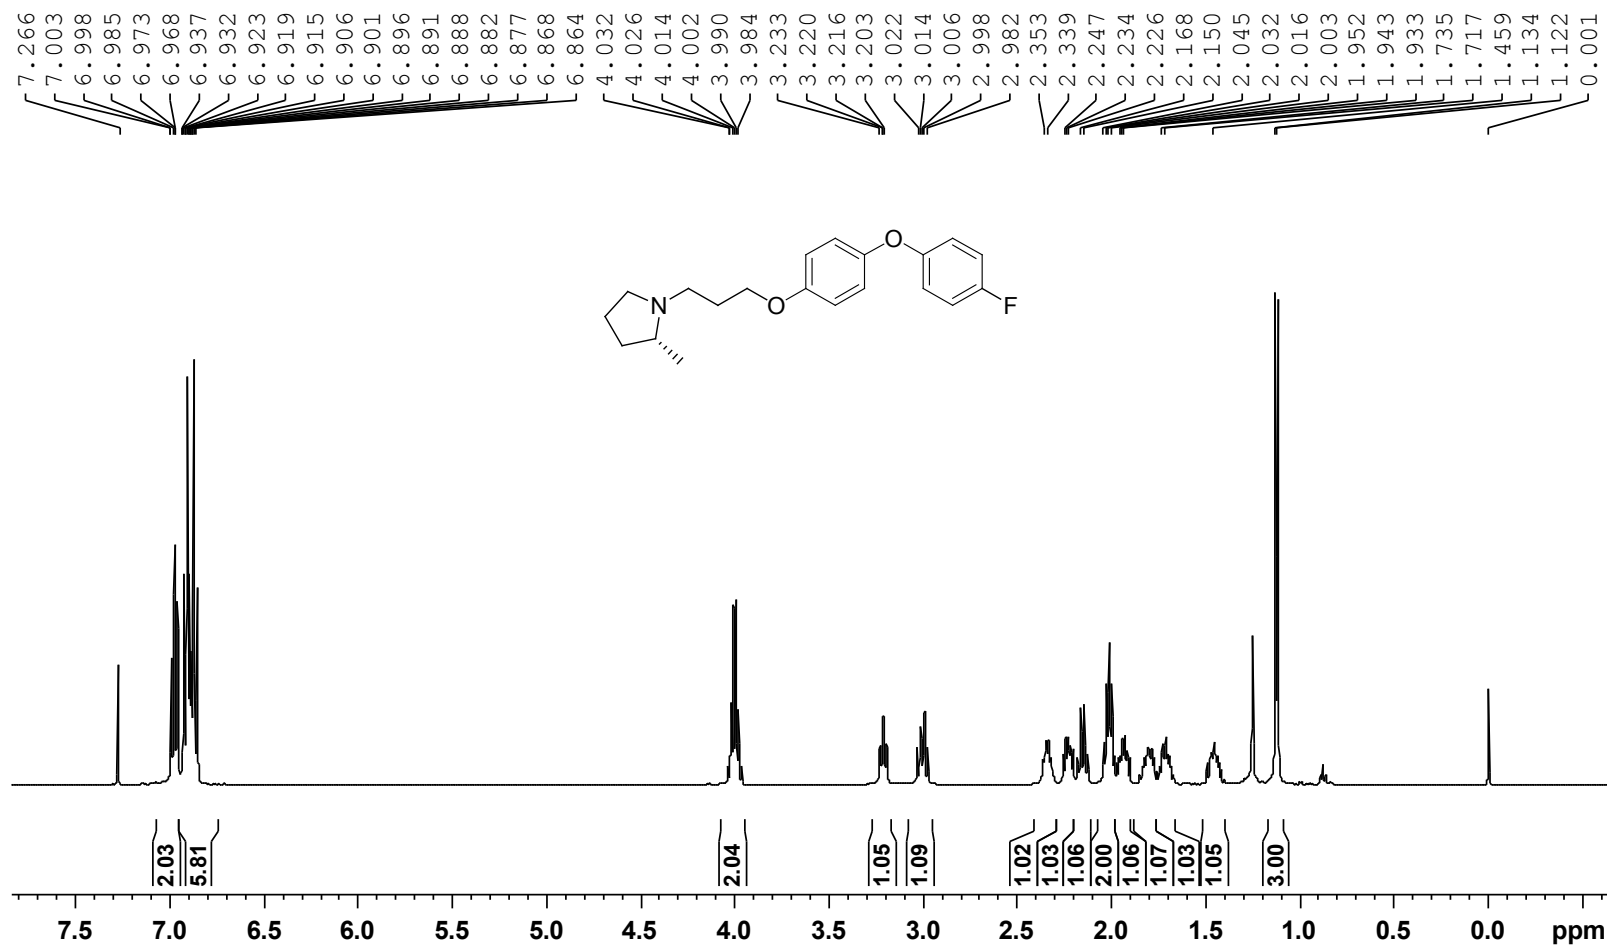

Figure 101.  $^1\text{H}$  NMR (500MHz,  $\text{CDCl}_3$ ) of 7E

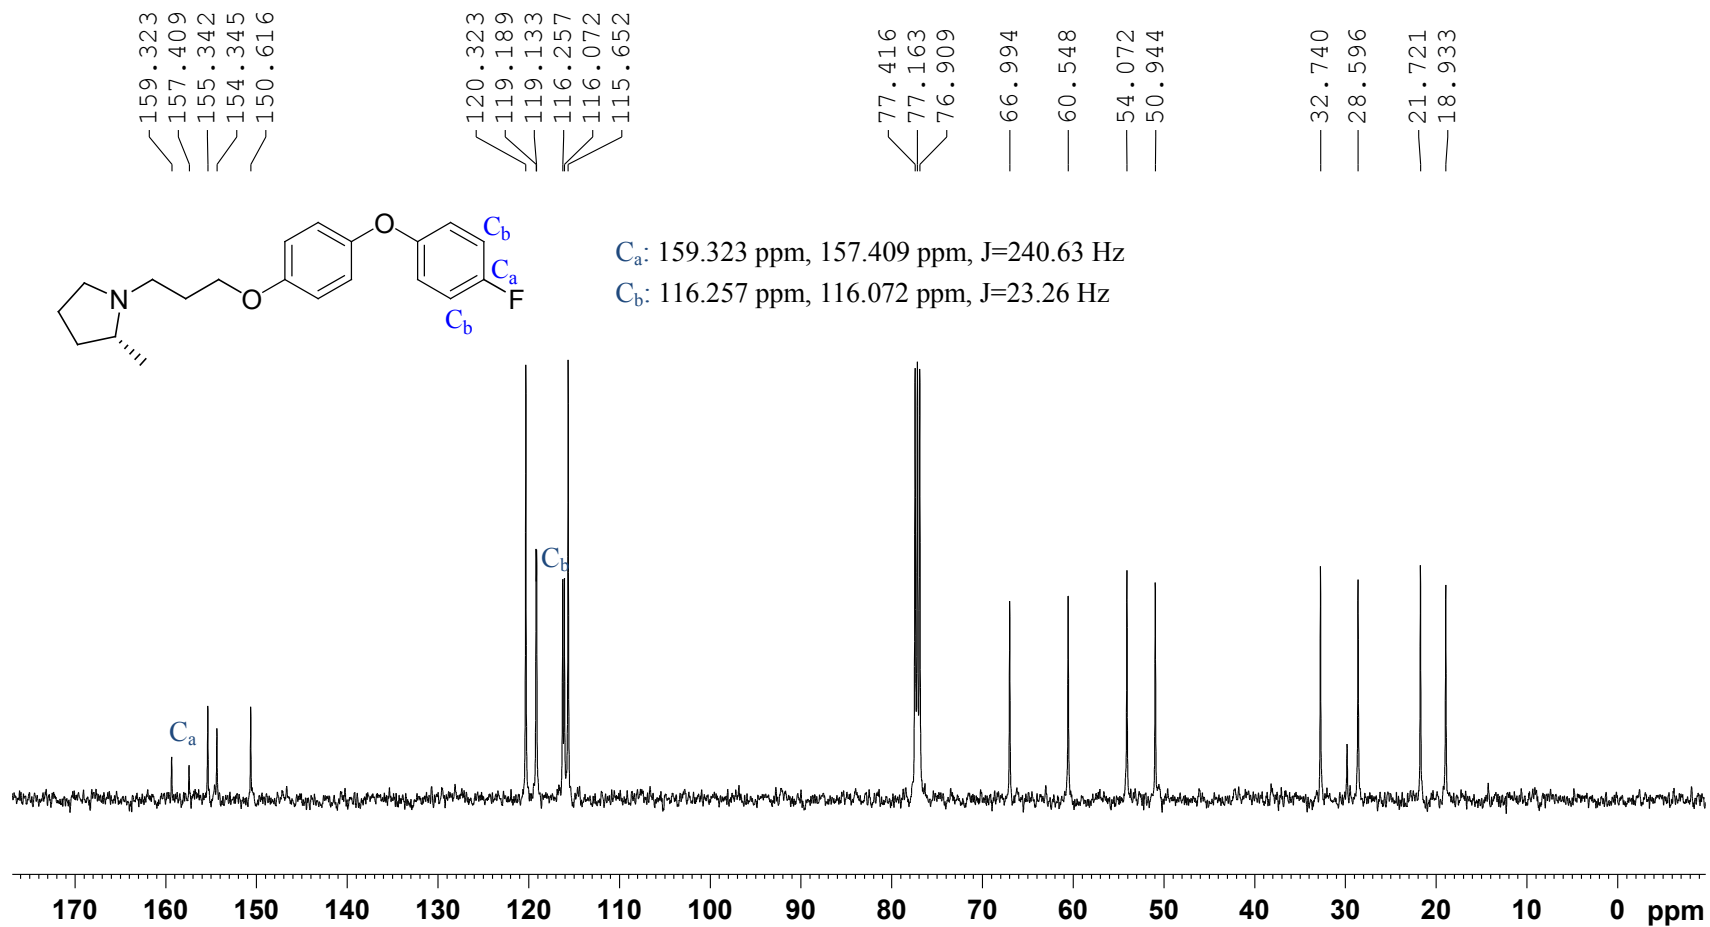

Figure 102.  $^{13}\text{C}$  NMR (125MHz,  $\text{CDCl}_3$ ) of 7E

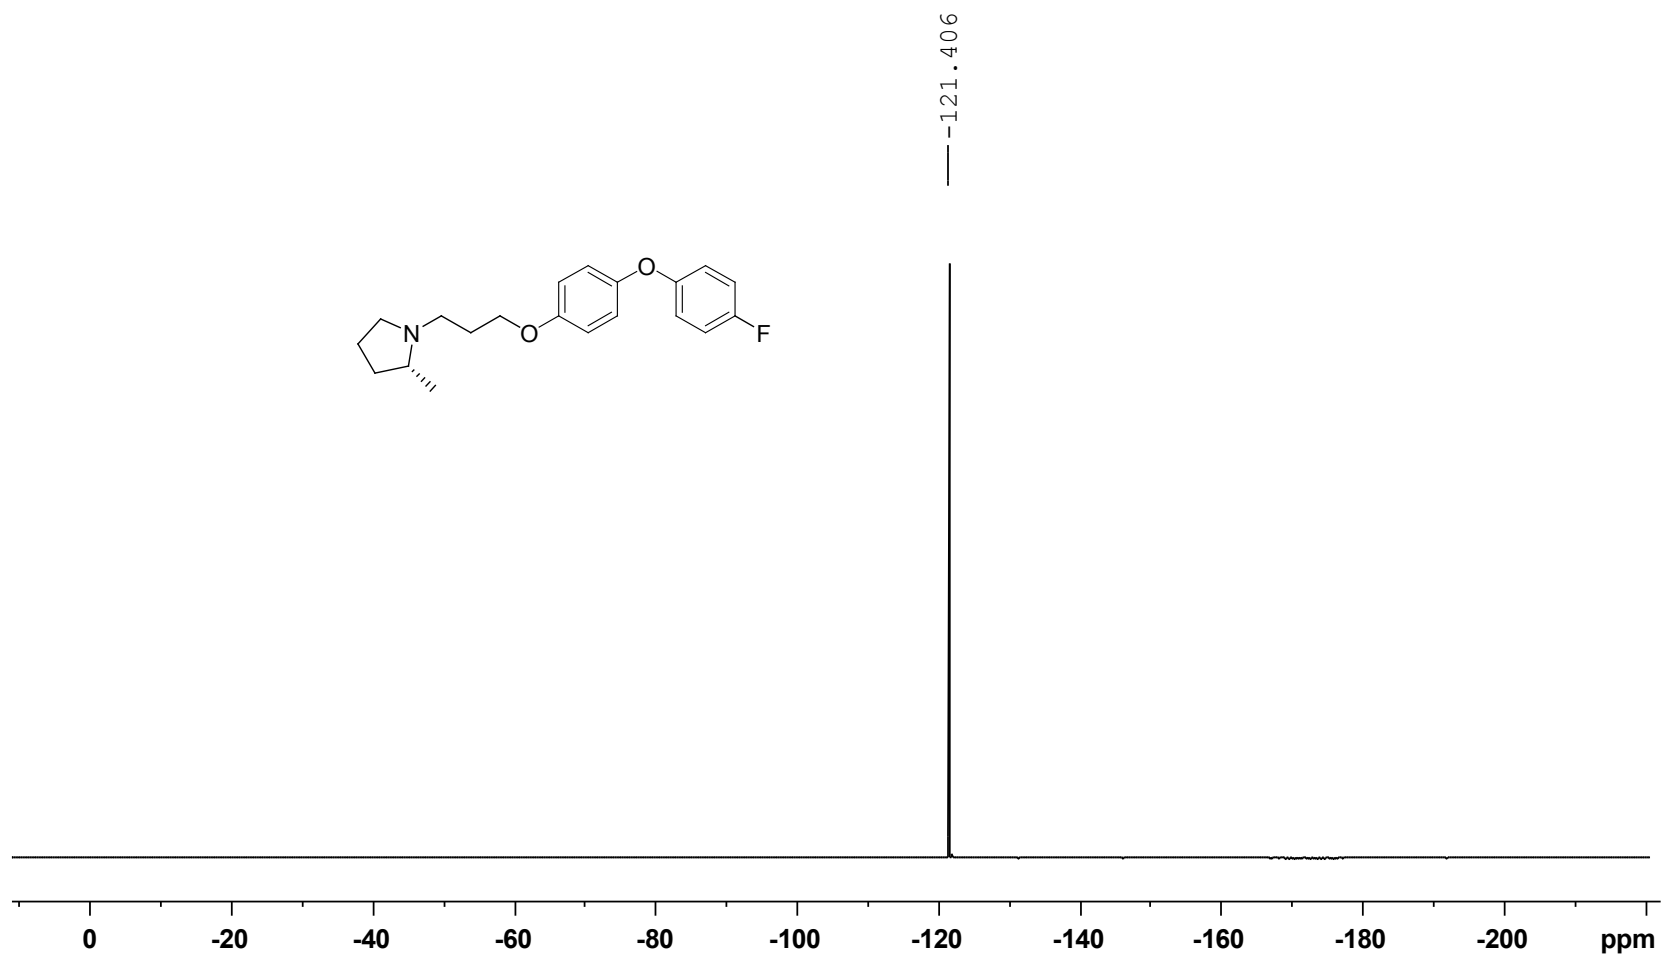

Figure 103.  $^{19}\text{F}$  NMR (470MHz,  $\text{CDCl}_3$ ) of **7E**

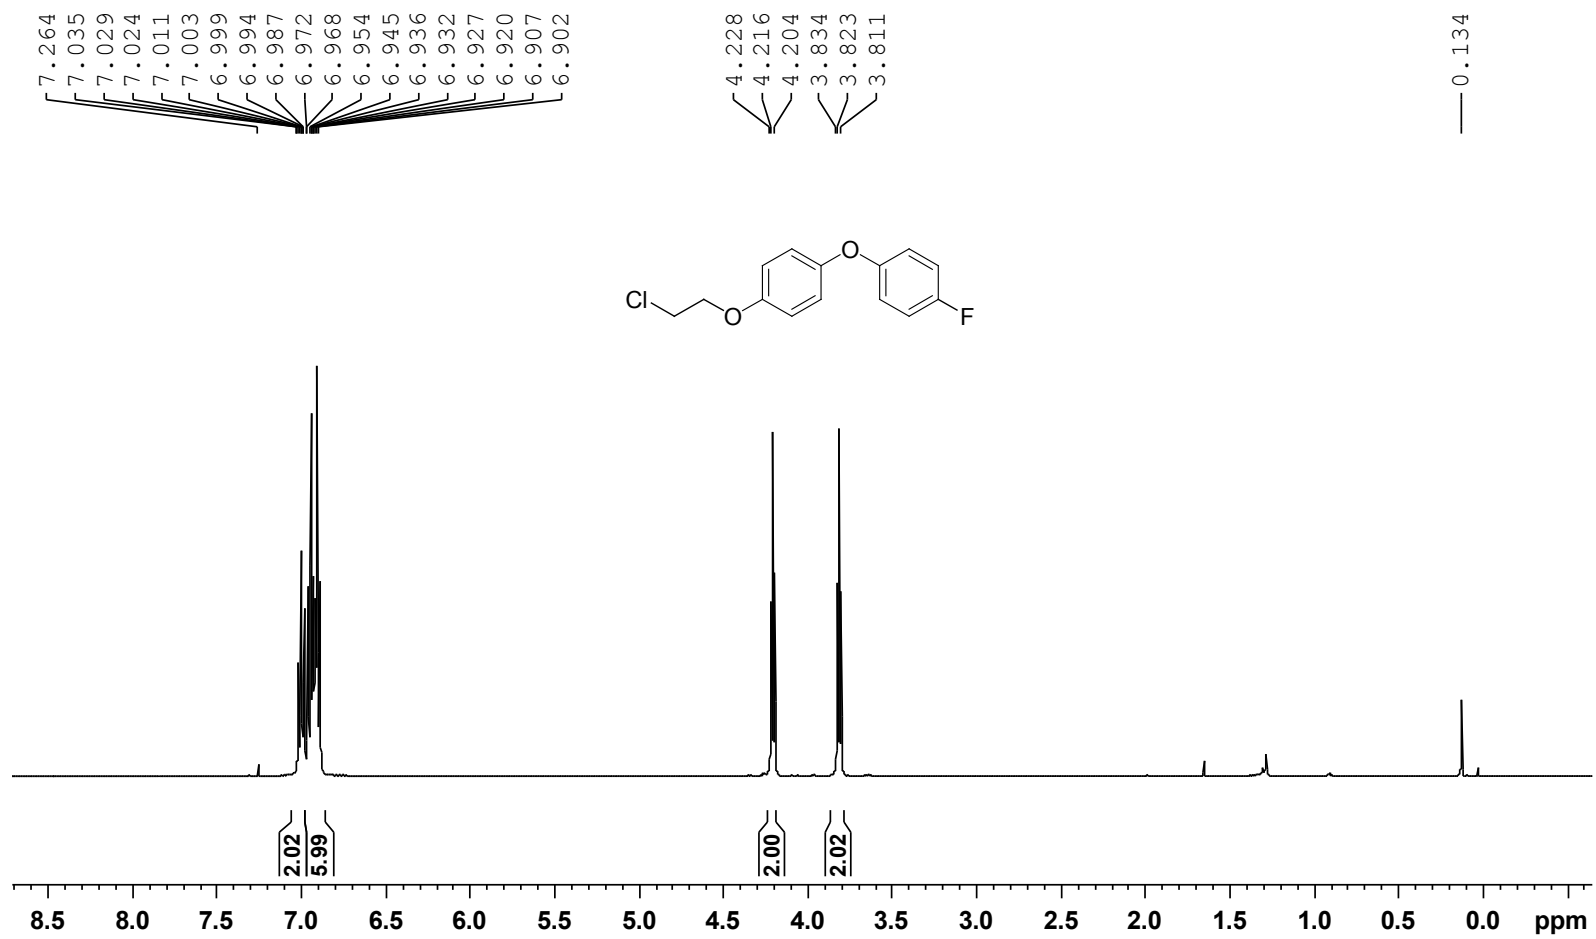

Figure 104. <sup>1</sup>H NMR (500MHz, CDCl<sub>3</sub>) of 6E'

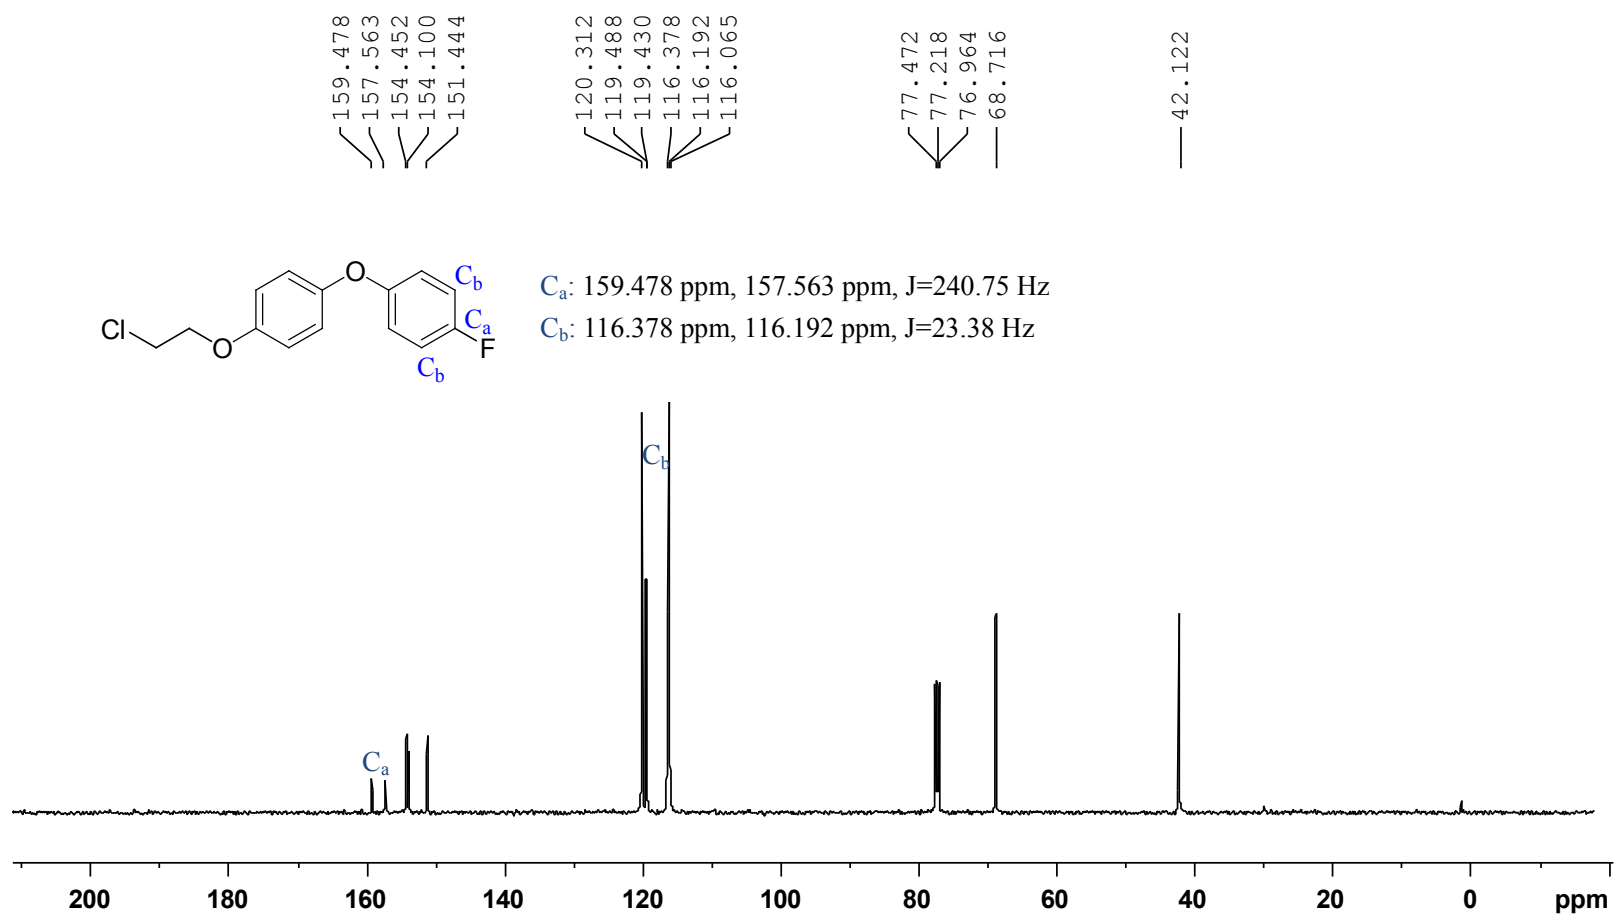

Figure 105.  $^{13}\text{C}$  NMR (125MHz,  $\text{CDCl}_3$ ) of **6E'**

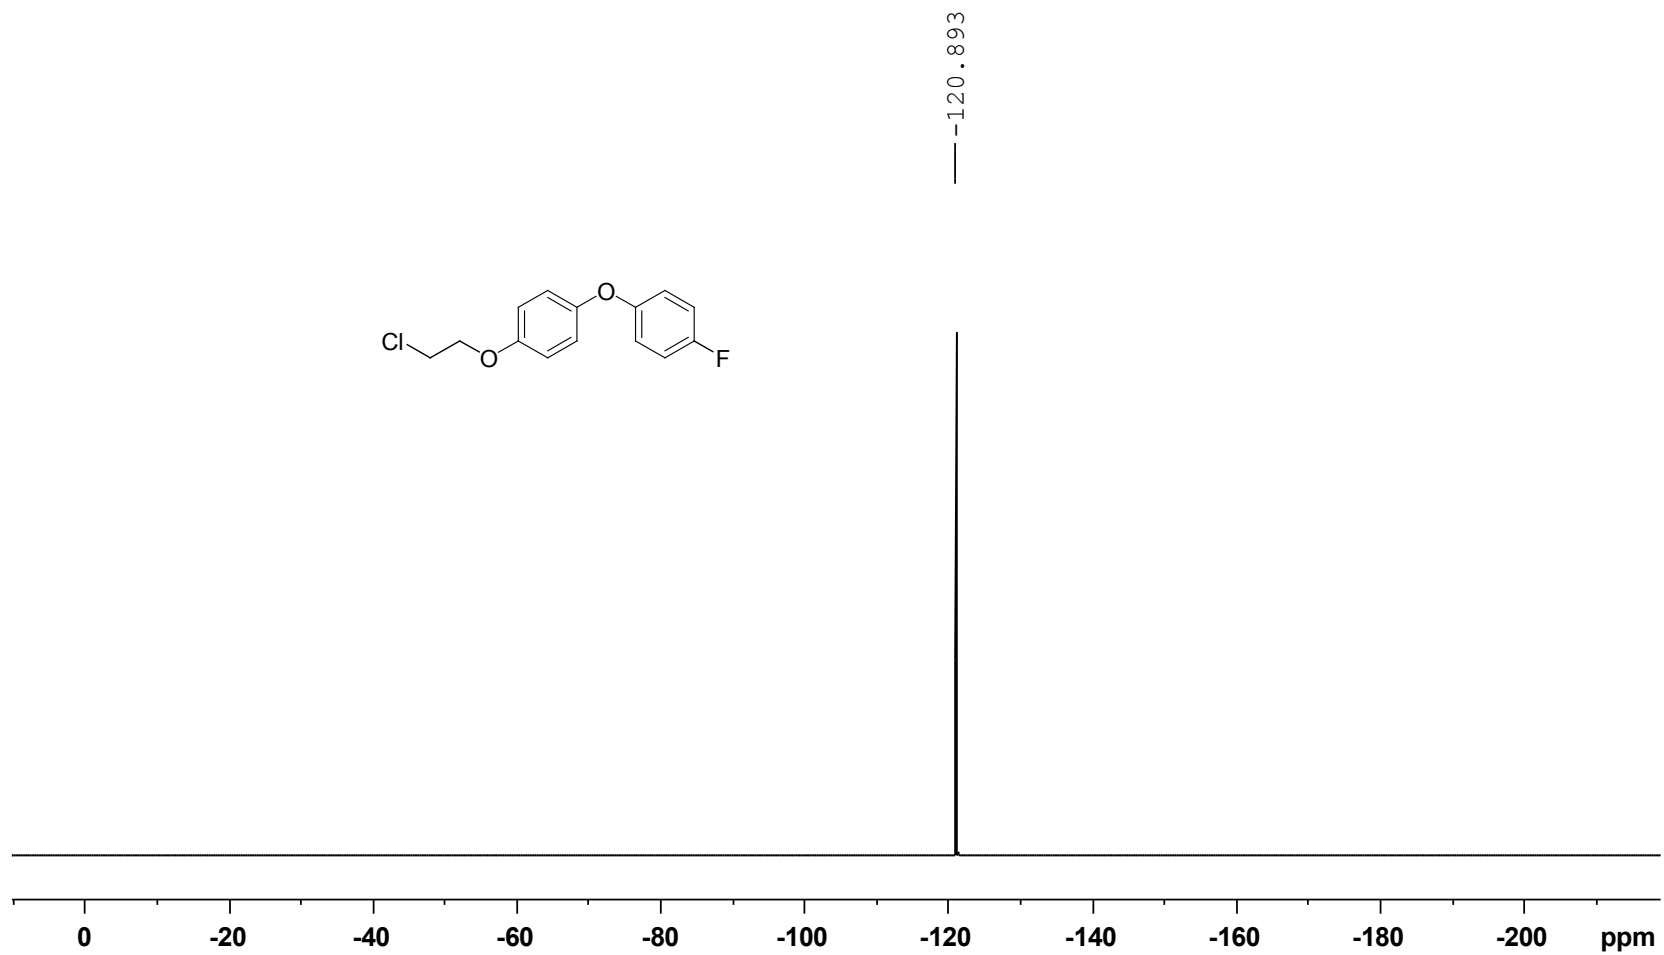

Figure 106.  $^{19}\text{F}$  NMR (470MHz,  $\text{CDCl}_3$ ) of **6E'**

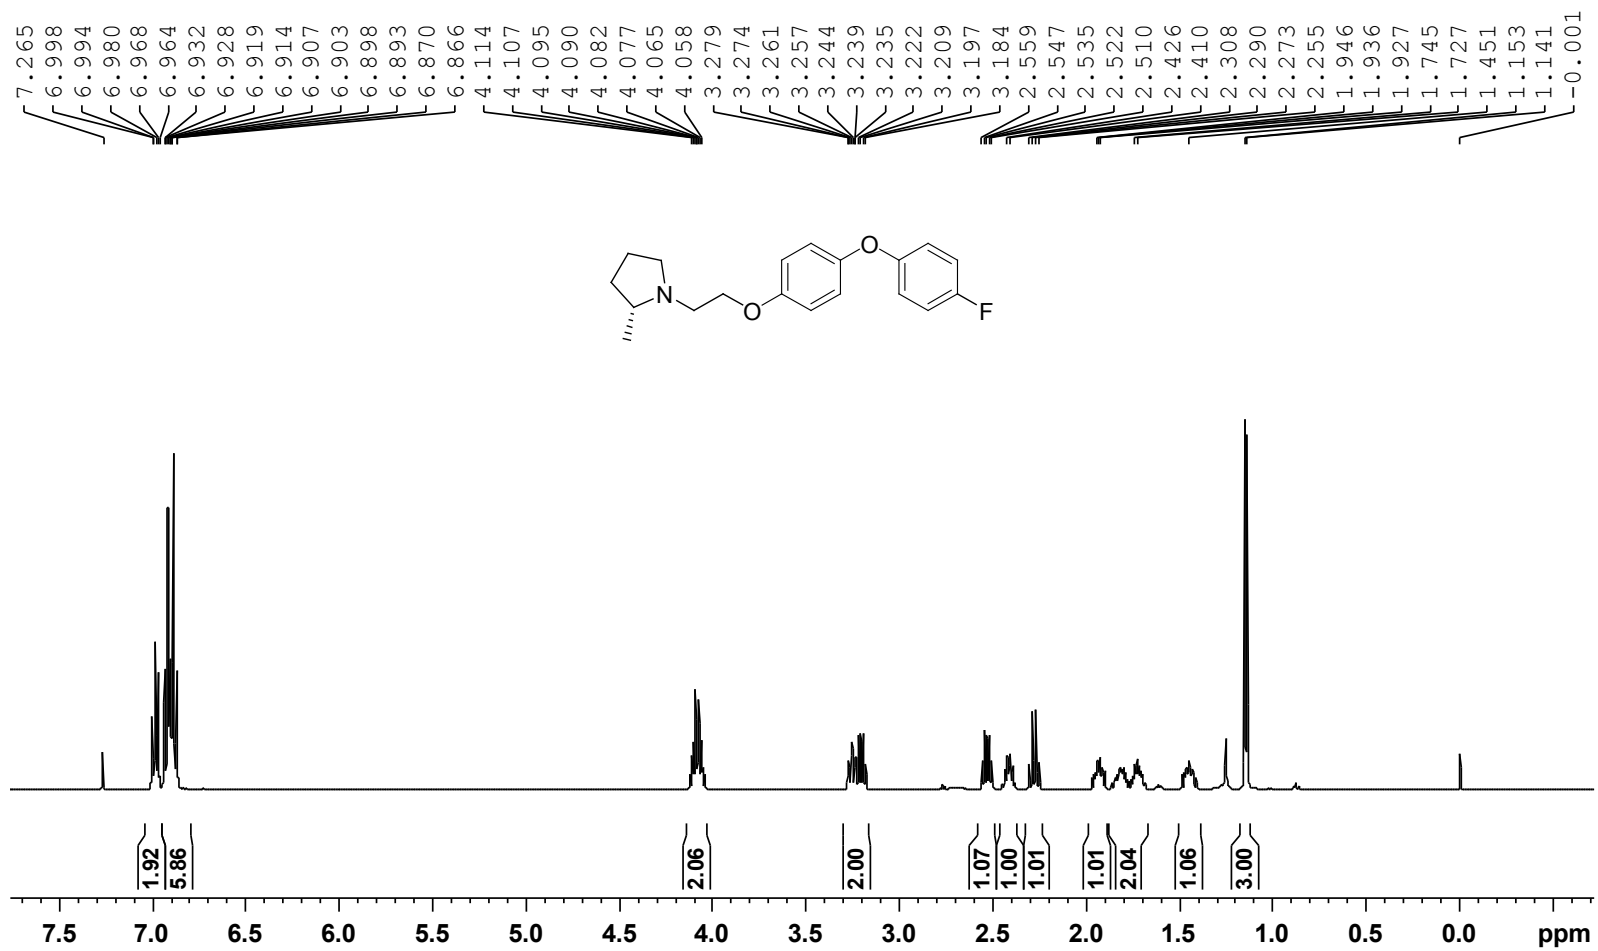

Figure 107. <sup>1</sup>H NMR (500MHz, CDCl<sub>3</sub>) of 7E'

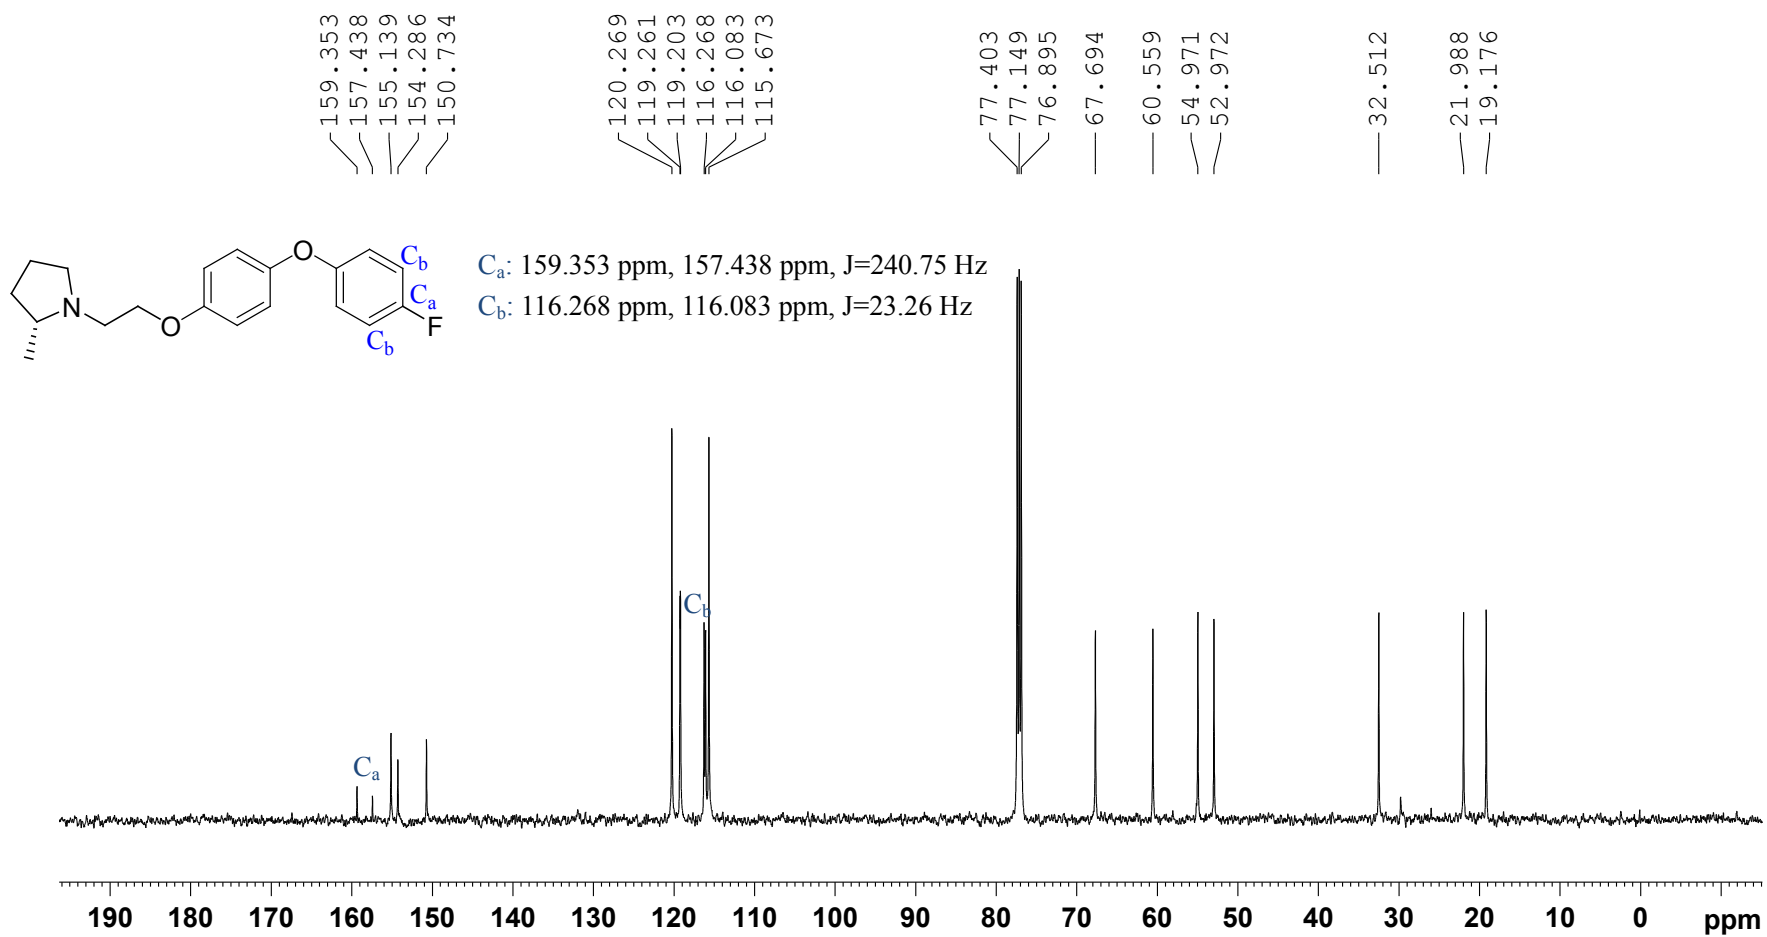

Figure 108. <sup>13</sup>C NMR (125MHz, CDCl<sub>3</sub>) of 7E'



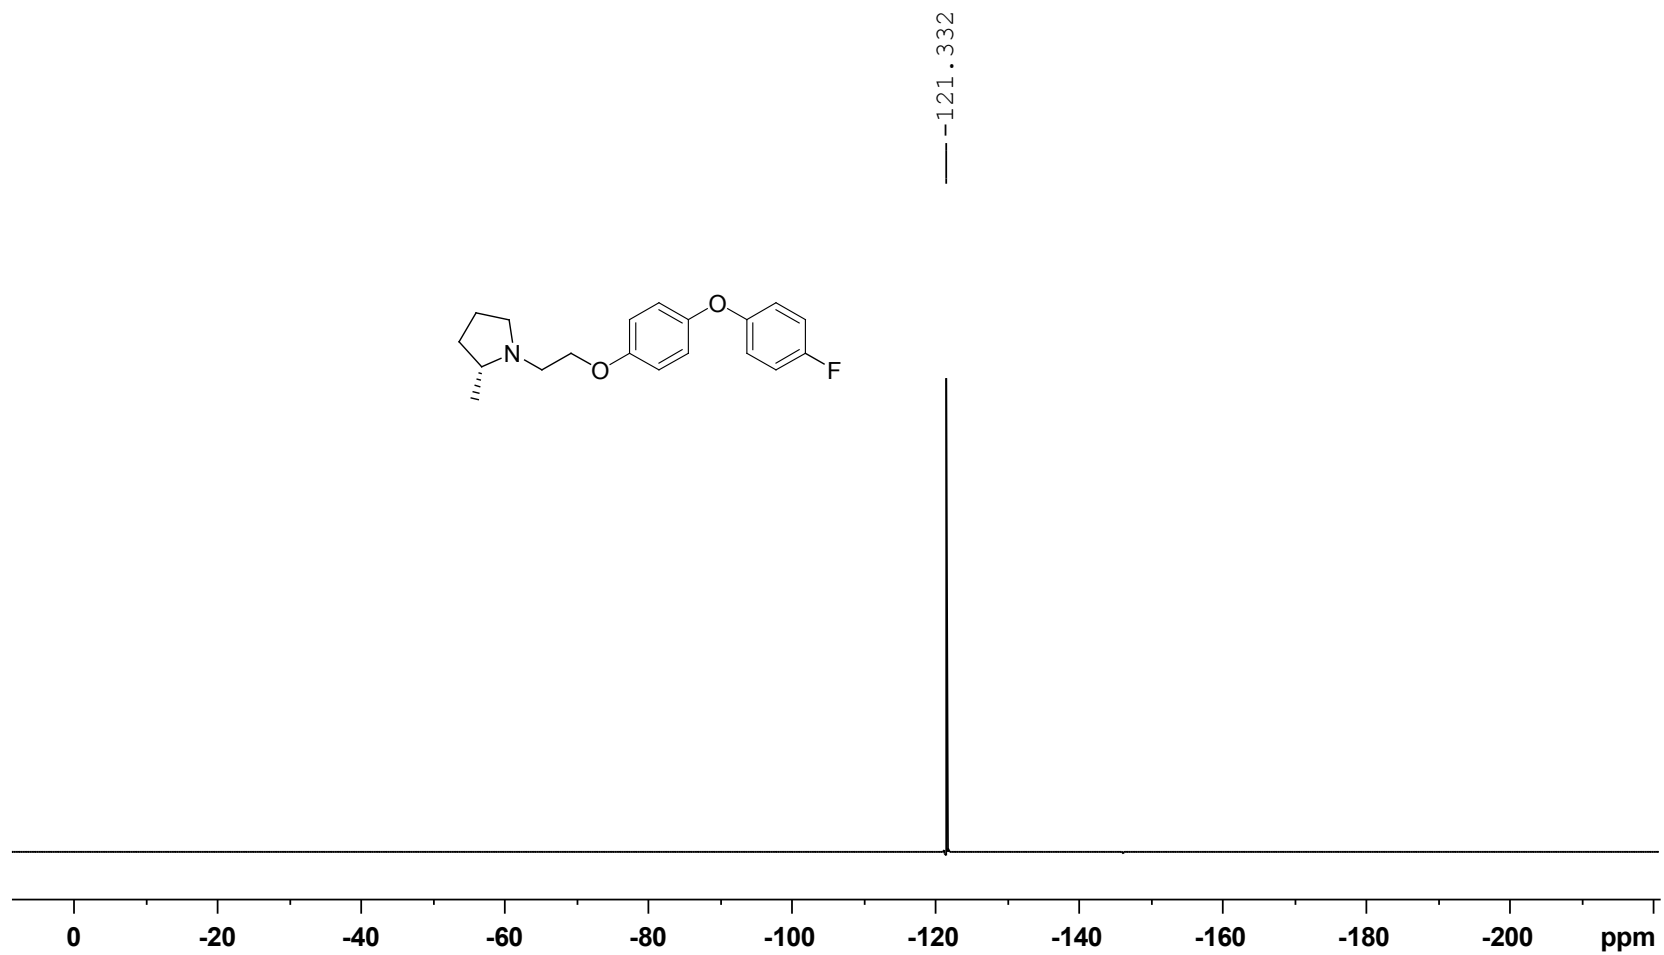

Figure 109.  $^{19}\text{F}$  NMR (470MHz,  $\text{CDCl}_3$ ) of **7E'**

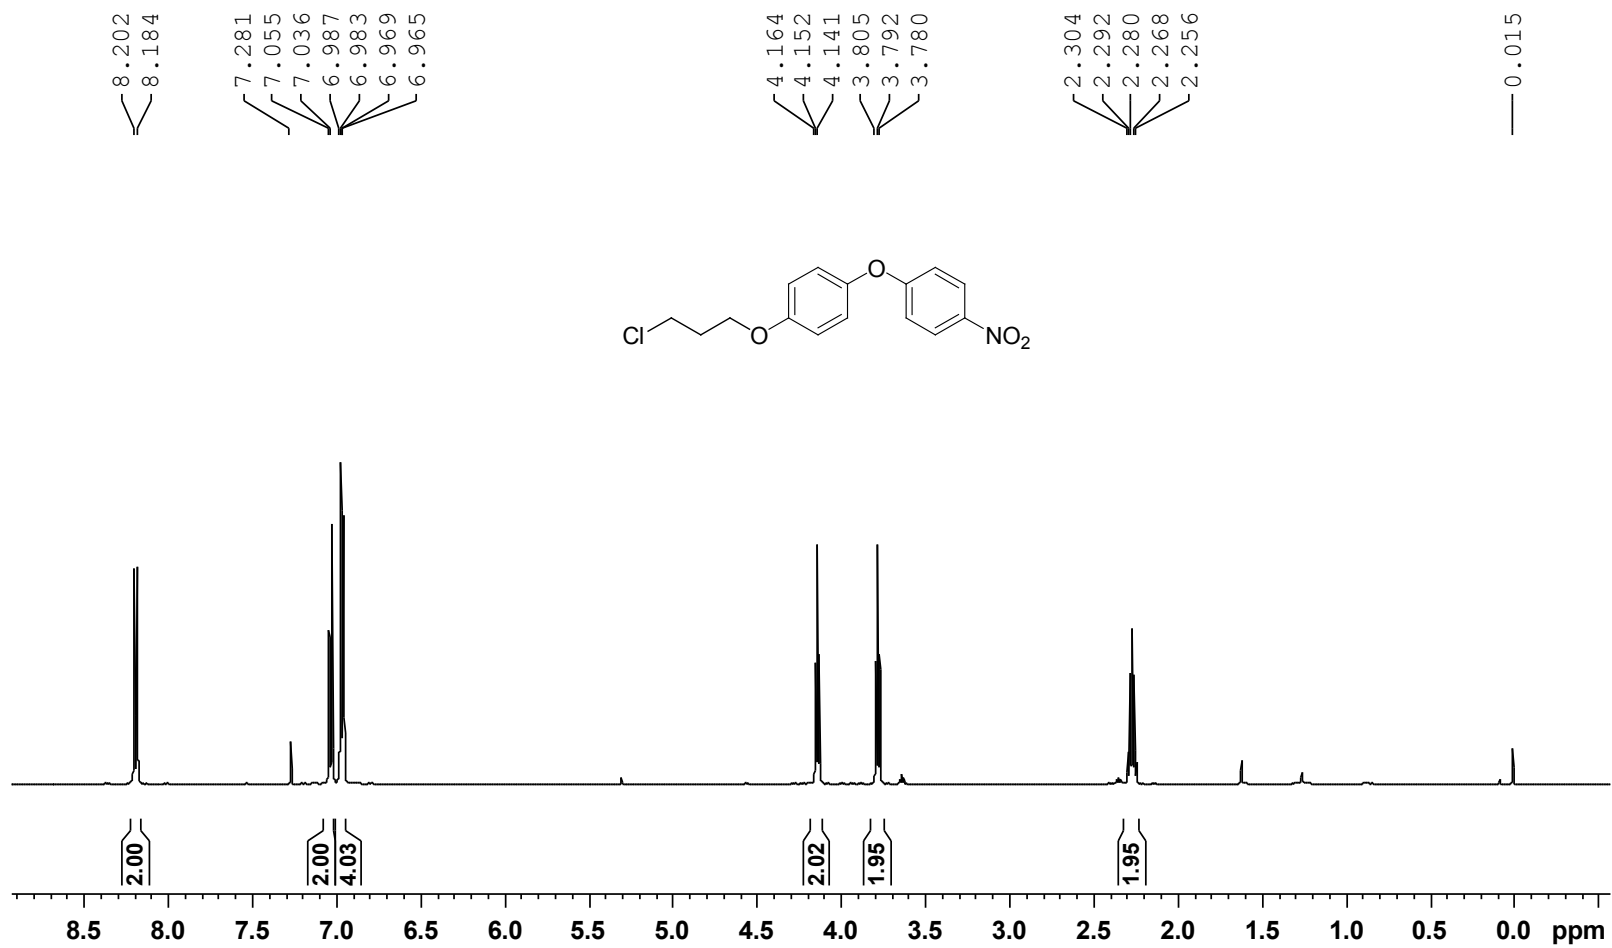

Figure 110. <sup>1</sup>H NMR (500MHz, CDCl<sub>3</sub>) of **6F**

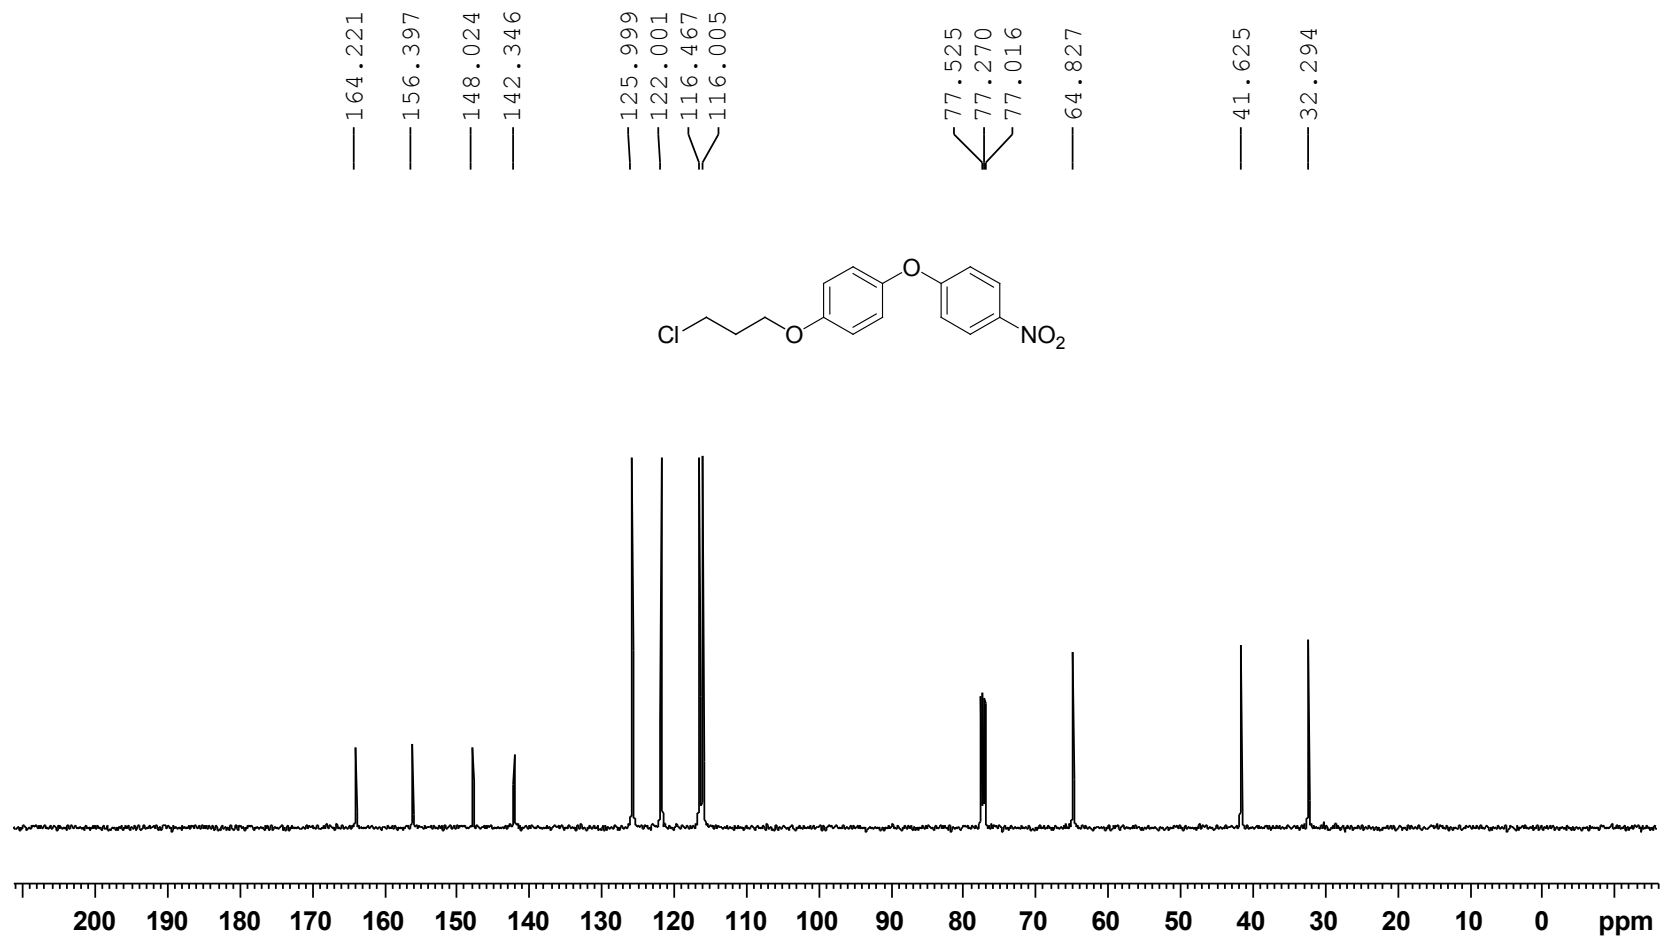

Figure 111. <sup>13</sup>C NMR (125MHz, CDCl<sub>3</sub>) of **6F**

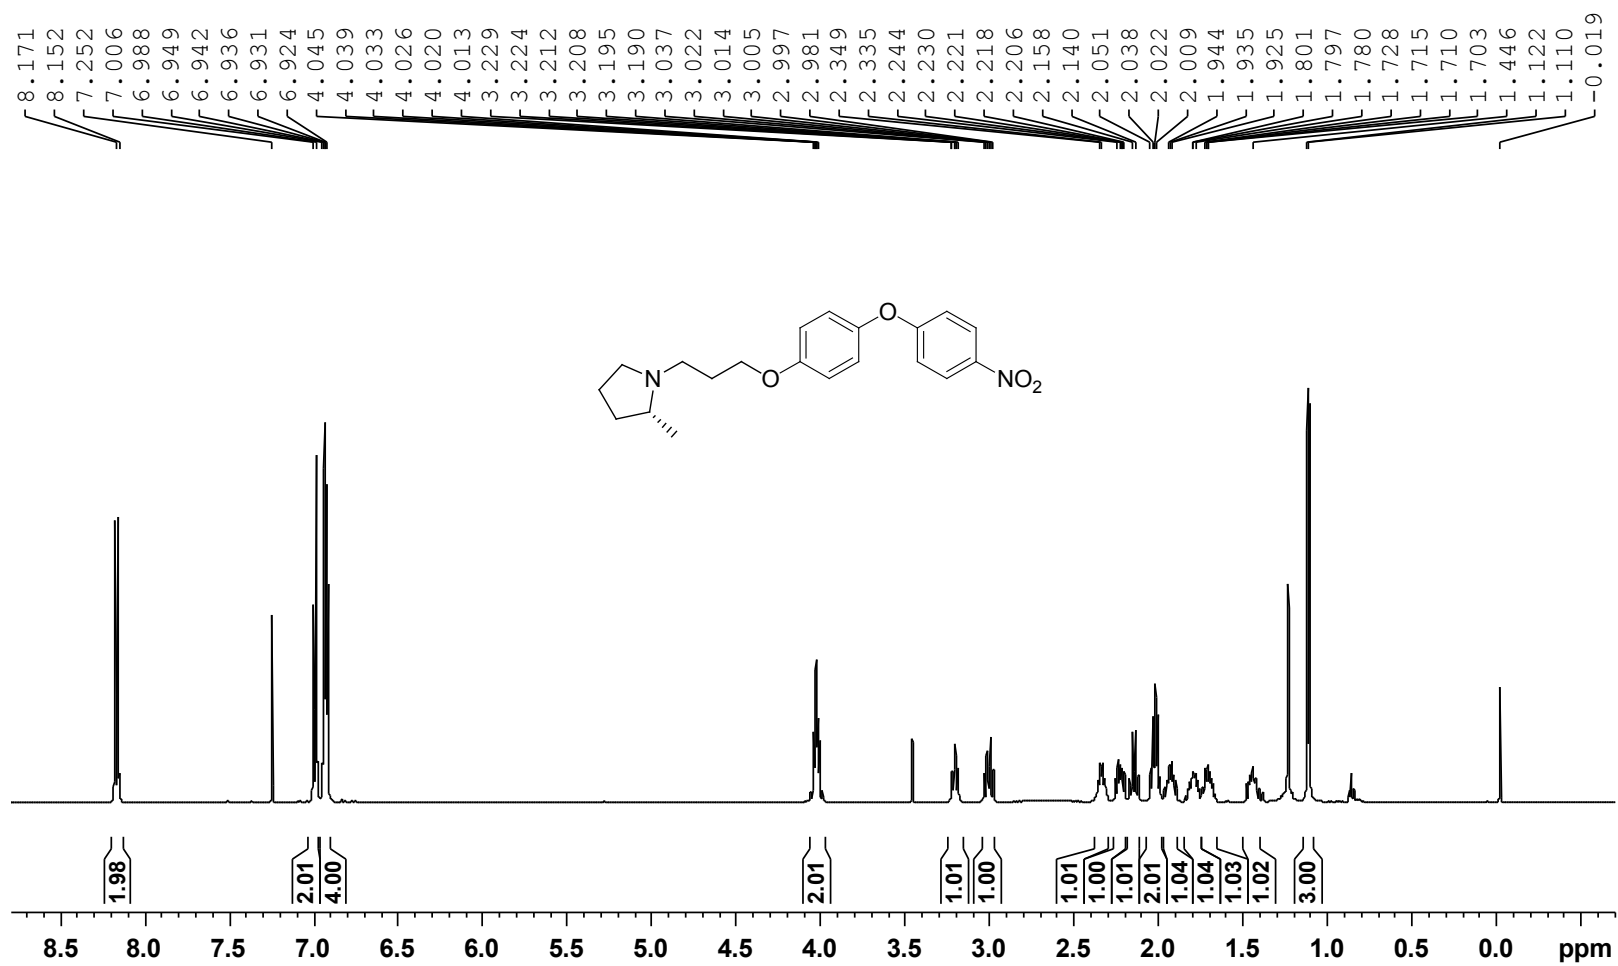

Figure 112. <sup>1</sup>H NMR (500MHz, CDCl<sub>3</sub>) of 7F

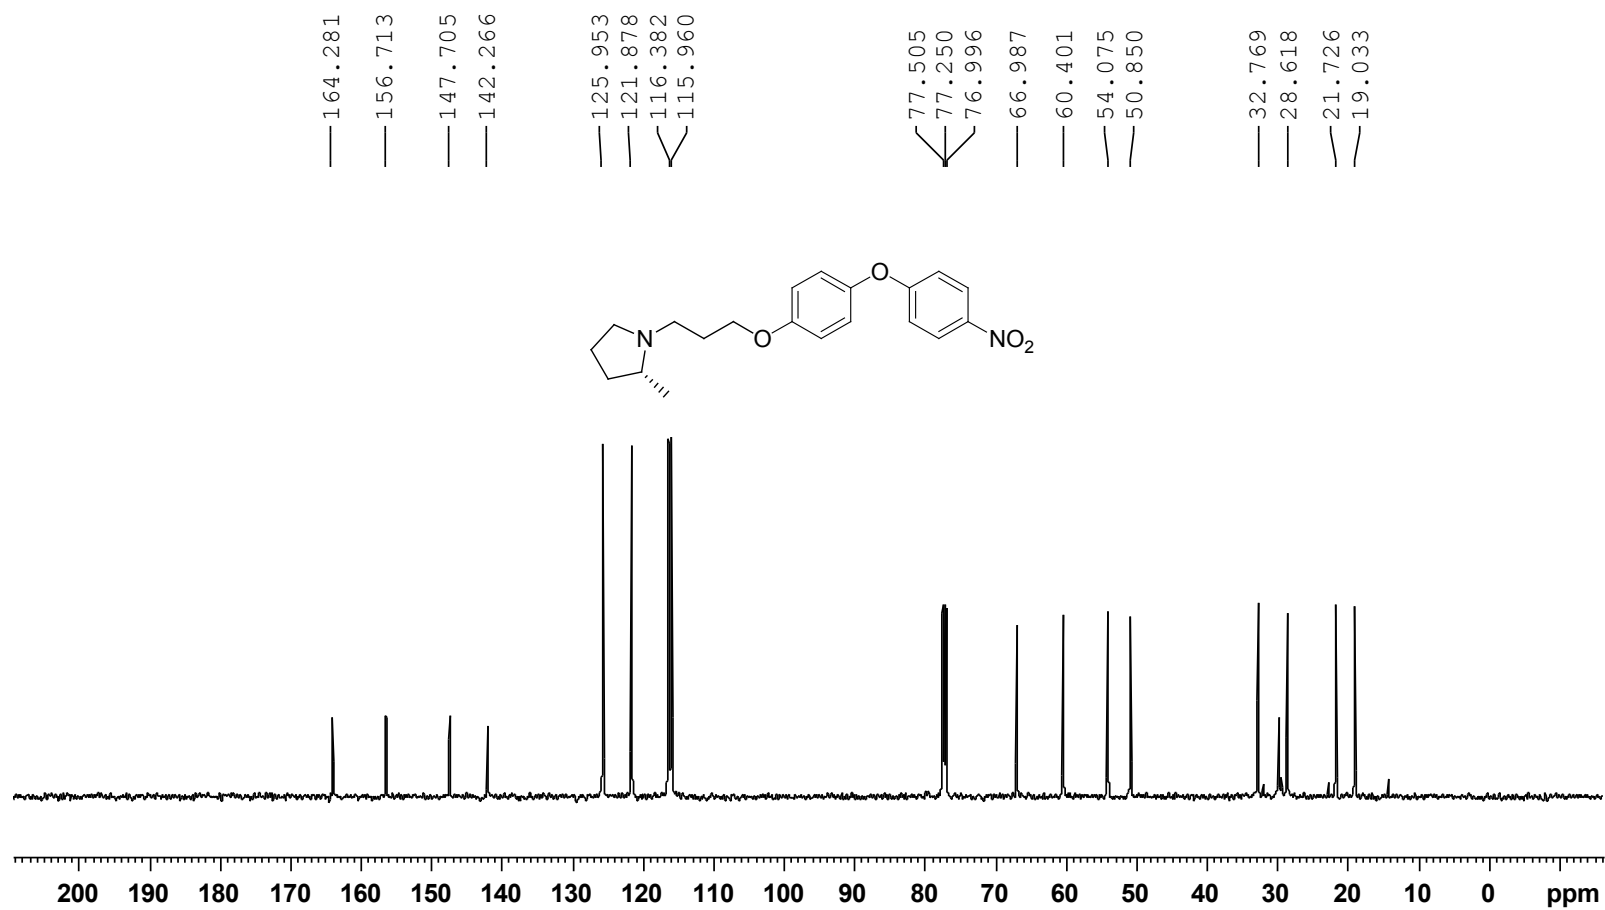

Figure 113.  $^{13}\text{C}$  NMR (125MHz,  $\text{CDCl}_3$ ) of 7F

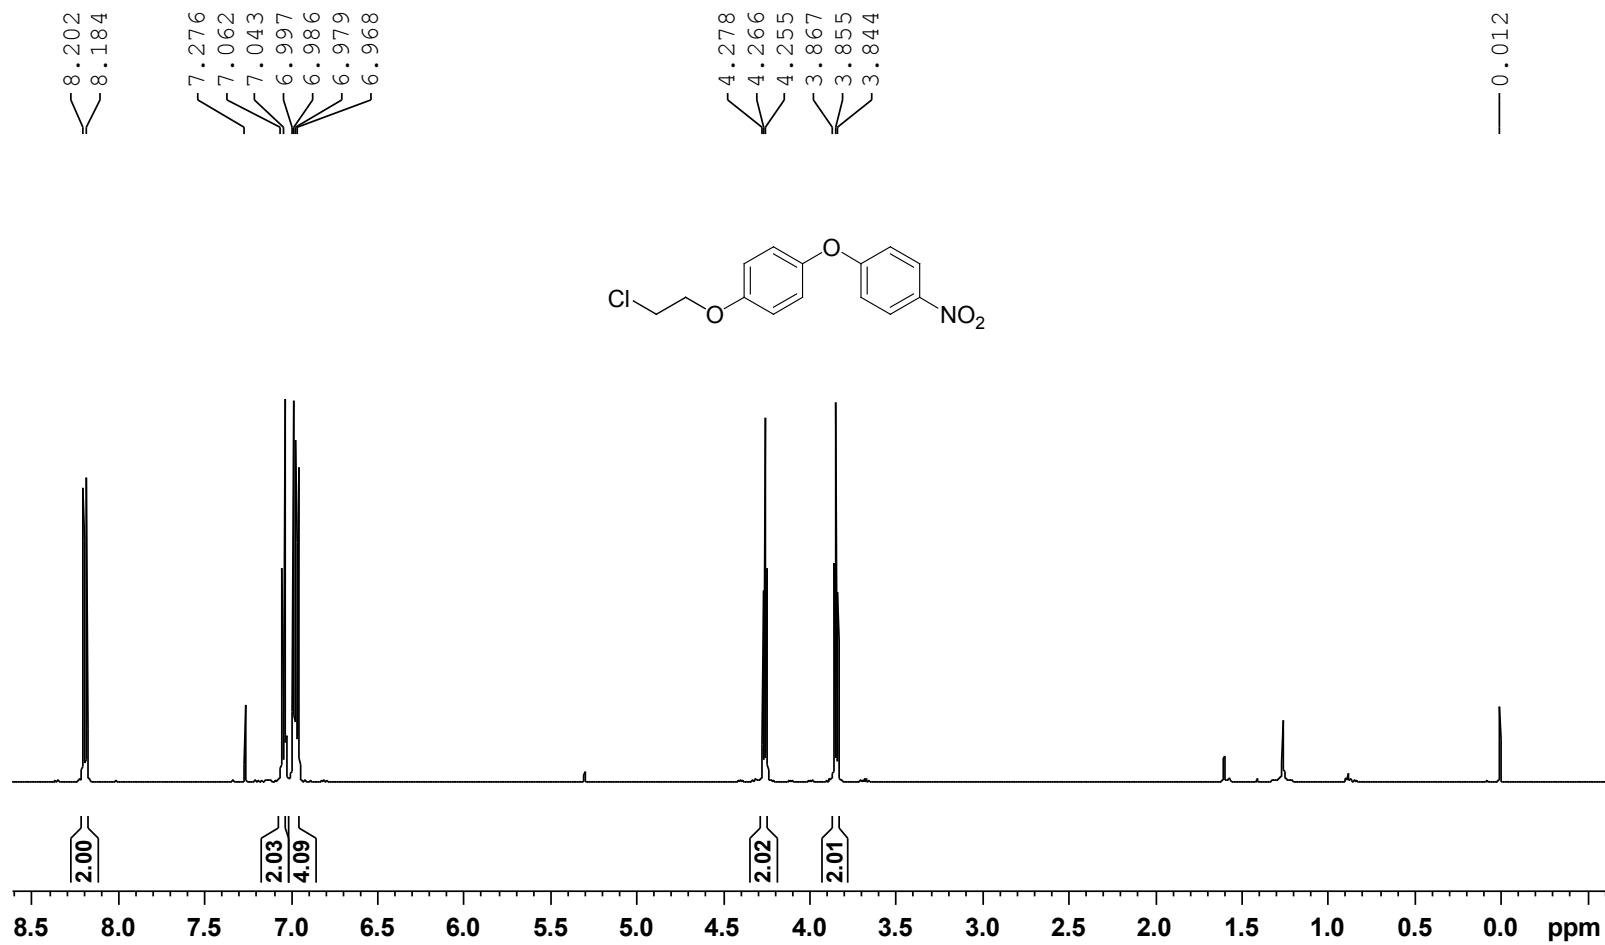

Figure 114. <sup>1</sup>H NMR (500MHz, CDCl<sub>3</sub>) of 6F'

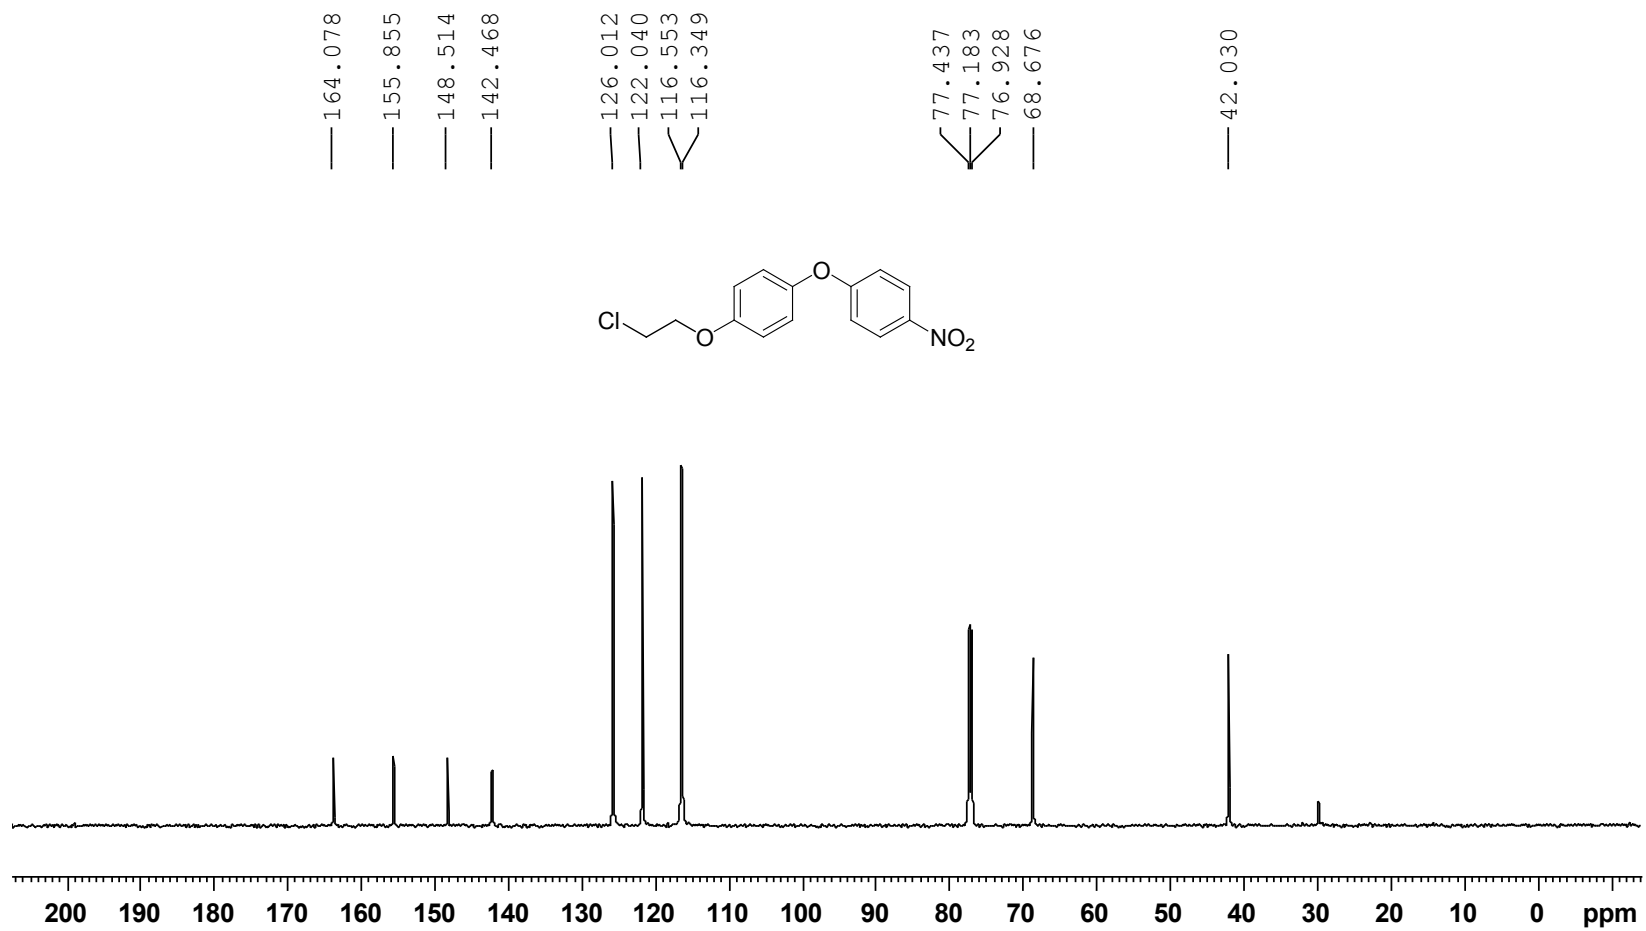

Figure 115.  $^{13}\text{C}$  NMR (125MHz,  $\text{CDCl}_3$ ) of **6F'**

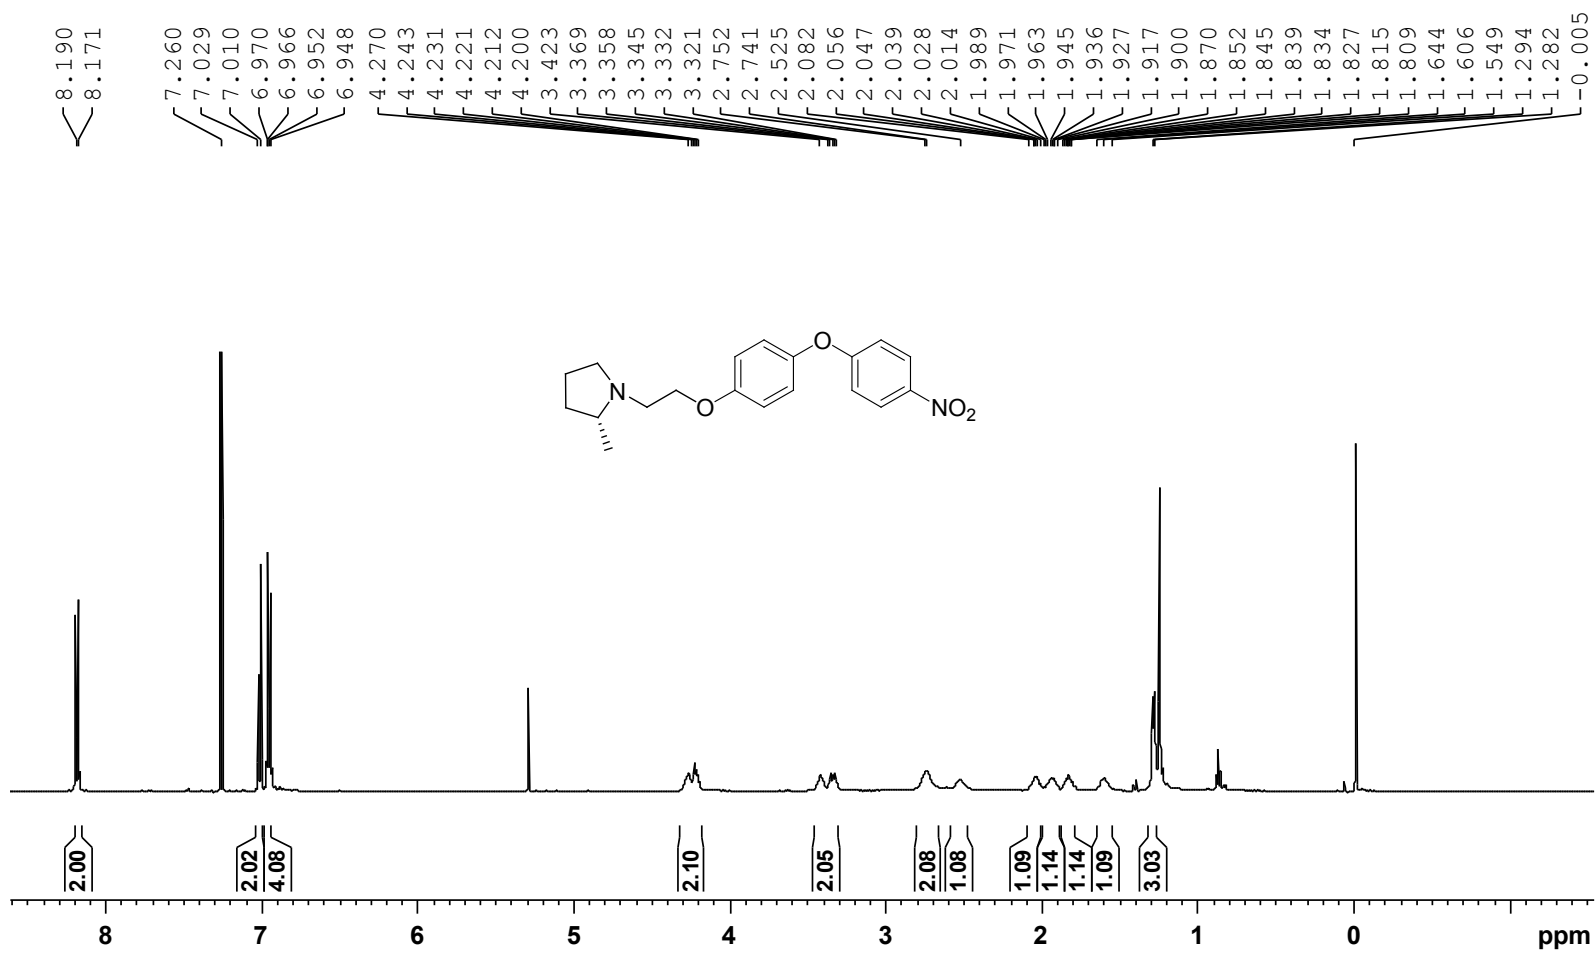

Figure 116. <sup>1</sup>H NMR (500MHz, CDCl<sub>3</sub>) of 7F'



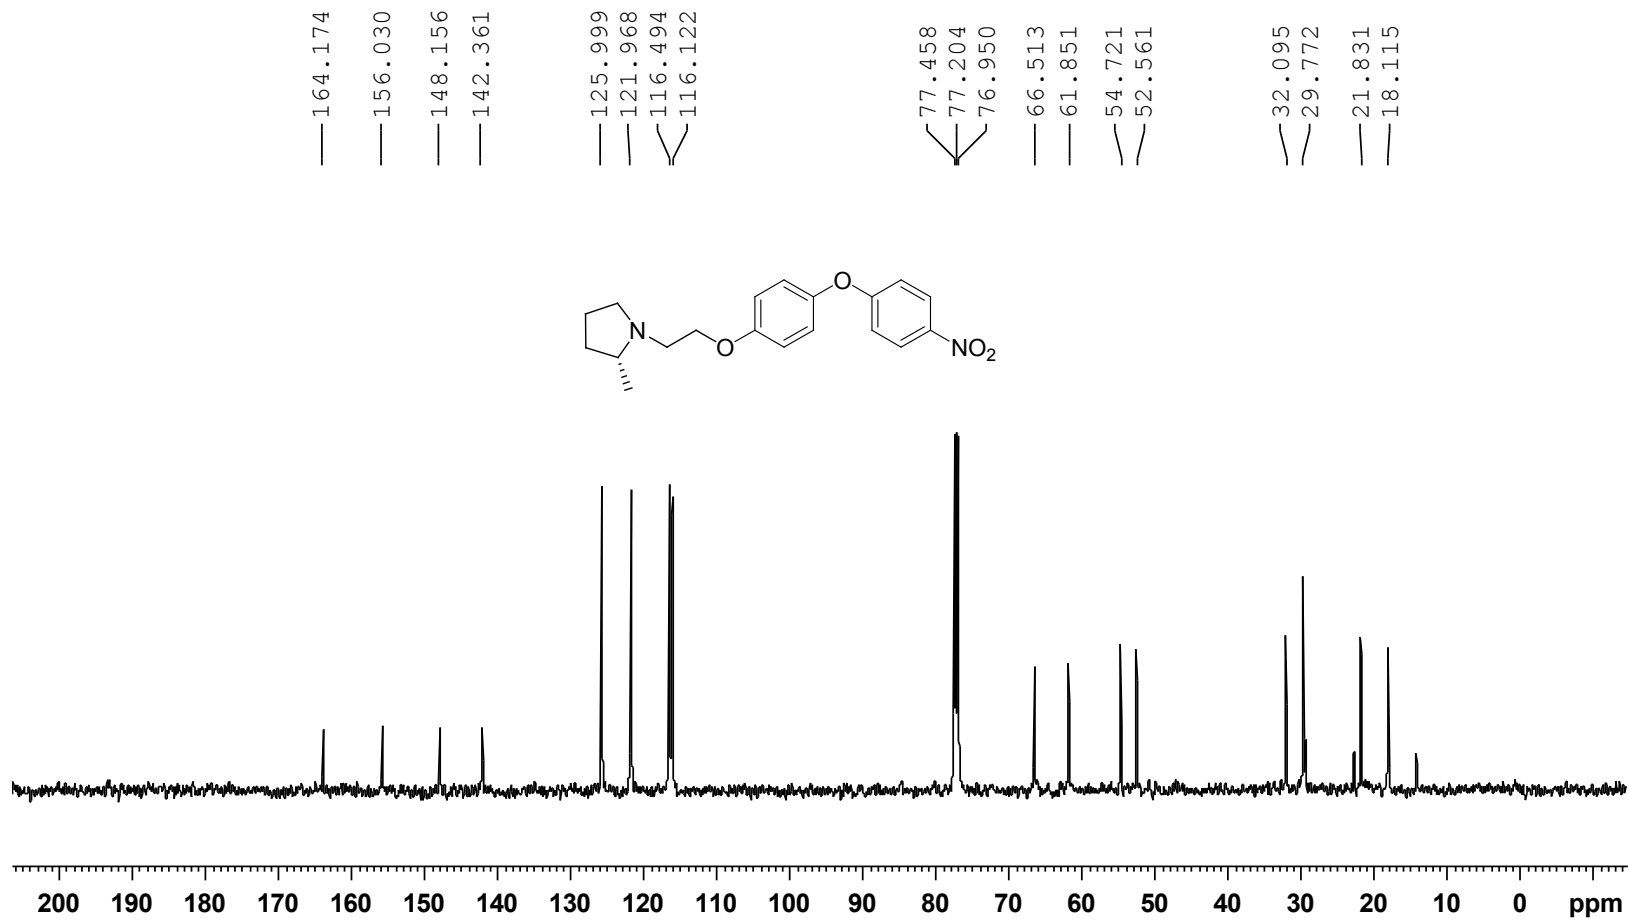

Supplement: c3ra46392c.pdf [file c3ra46392c.pdf]
